# Supplementary material
Source: publisher figshare collection journal article supplement (https://gsapubs.figshare.com/ndownloader/files/23319545)
Supplement: Supplementary file 1 [file 23319545]

## Sheet: PlotDat1
Source sheet	Summary	0.3	155.64	1	101.3	0.6
Plot name	Average1	37.7	155.64	2	101.3	0.6
Plot Type	15			3	101.3	0.9
1st free col	8			4	101.9	0.9
Sigma Level	2			5	102.6	0.9
Absolute Errs	TRUE			6	103.3	0.6
Symbol Type	1			7	103.4	1.9
Inverse Plot	FALSE			8	124.2	6.9
Color Plot	TRUE			9	141.9	6.8
3D plot	FALSE			10	143	16
Linear	FALSE			11	149.2	0.9
Data Range	F4:G40			12	149.6	0.8
Filled Symbols	FALSE			13	151.5	1.1
ConcAge	FALSE			14	151.7	7.9
ConcSwap	FALSE			15	152.4	0.8
1st Symbol-row	1			16	155.2	2.7
				17	156.3	3.8
				18	158	1.6
				19	162.5	1
				20	163.4	1.3
				21	165.8	1.7
				22	166.2	0.8
				23	168	0.9
				24	173.1	1.2
				25	179.5	1.4
				26	201.5	3.6
				27	204.4	1.2
				28	206	1.4
				29	209.7	1.9
				30	209.9	0.7
				31	210.6	1
				32	215.2	1
				33	216.2	1.1
				34	216.2	1
				35	218.7	0.7
				36	232.6	1.4
				37	253.3	1.7
				IsoLine	IsoLine	IsoLine	IsoLine

## Sheet: PlotDat2
Source sheet	ZirconData	0	0	87.5	0	0	0
Plot name	ProbDens2	1.75	0	175	0	3498.25	0
Plot Type	16	3.5	0	175	774
1st free col	9	5.25	0	87.5	774
Sigma Level	2	7	0	87.5	0
Absolute Errs	TRUE	8.75	0	ErrBox	ErrBox
Symbol Type	1	10.5	0	175	0
Inverse Plot	FALSE	12.25	0	262.5	0
Color Plot	TRUE	14	0	262.5	554
3D plot	FALSE	15.75	0	175	554
Linear	FALSE	17.5	0	175	0
Data Range	AA2:AB1498	19.25	6.78218e-10	ErrBox	ErrBox
Filled Symbols	FALSE	21	7.0232e-10	262.5	0
ConcAge	FALSE	22.75	7.27221e-10	350	0
ConcSwap	FALSE	24.5	7.52945e-10	350	20
1st Symbol-row	1	26.25	7.79515e-10	262.5	20
		28	8.06959e-10	262.5	0
		29.75	8.35301e-10	ErrBox	ErrBox
		31.5	8.6457e-10	350	0
		33.25	8.94792e-10	437.5	0
		35	9.25996e-10	437.5	23
		36.75	9.58211e-10	350	23
		38.5	9.91468e-10	350	0
		40.25	1.0258e-09	ErrBox	ErrBox
		42	1.06123e-09	437.5	0
		43.75	1.09779e-09	525	0
		45.5	1.13553e-09	525	18
		47.25	1.17447e-09	437.5	18
		49	1.21465e-09	437.5	0
		50.75	1.2561e-09	ErrBox	ErrBox
		52.5	1.29886e-09	525	0
		54.25	1.34296e-09	612.5	0
		56	1.38846e-09	612.5	5
		57.75	1.43538e-09	525	5
		59.5	1.48376e-09	525	0
		61.25	1.53366e-09	ErrBox	ErrBox
		63	1.5851e-09	612.5	0
		64.75	1.63814e-09	700	0
		66.5	1.69282e-09	700	5
		68.25	1.74918e-09	612.5	5
		70	1.80727e-09	612.5	0
		71.75	1.86715e-09	ErrBox	ErrBox
		73.5	1.92885e-09	700	0
		75.25	1.99243e-09	787.5	0
		77	2.05794e-09	787.5	8
		78.75	2.12543e-09	700	8
		80.5	2.19496e-09	700	0
		82.25	2.26658e-09	ErrBox	ErrBox
		84	2.59765e-08	787.5	0
		85.75	1.1006e-06	875	0
		87.5	1.7155e-05	875	6
		89.25	9.01104e-05	787.5	6
		91	0.000160959	787.5	0
		92.75	0.0001256	ErrBox	ErrBox
		94.5	0.000288708	875	0
		96.25	0.00164497	962.5	0
		98	0.00655168	962.5	3
		99.75	0.0158152	875	3
		101.5	0.0260501	875	0
		103.25	0.0248684	ErrBox	ErrBox
		105	0.0145355	962.5	0
		106.75	0.00709238	1050	0
		108.5	0.004206	1050	6
		110.25	0.00310785	962.5	6
		112	0.00165072	962.5	0
		113.75	0.000916144	ErrBox	ErrBox
		115.5	0.000811504	1050	0
		117.25	0.000912945	1137.5	0
		119	0.00115387	1137.5	6
		120.75	0.00224239	1050	6
		122.5	0.00335333	1050	0
		124.25	0.00314596	ErrBox	ErrBox
		126	0.00232314	1137.5	0
		127.75	0.00178766	1225	0
		129.5	0.00138816	1225	4
		131.25	0.000967491	1137.5	4
		133	0.000610105	1137.5	0
		134.75	0.000484973	ErrBox	ErrBox
		136.5	0.000785516	1225	0
		138.25	0.00103665	1312.5	0
		140	0.000940436	1312.5	6
		141.75	0.000871716	1225	6
		143.5	0.00121968	1225	0
		145.25	0.0029015	ErrBox	ErrBox
		147	0.00678237	1312.5	0
		148.75	0.0116194	1400	0
		150.5	0.0131507	1400	5
		152.25	0.0117052	1312.5	5
		154	0.00948658	1312.5	0
		155.75	0.00734811	ErrBox	ErrBox
		157.5	0.00660372	1487.5	0
		159.25	0.00775483	1575	0
		161	0.0098949	1575	3
		162.75	0.0121456	1487.5	3
		164.5	0.01361	1487.5	0
		166.25	0.0139106	ErrBox	ErrBox
		168	0.0120396	1575	0
		169.75	0.00959431	1662.5	0
		171.5	0.00756088	1662.5	7
		173.25	0.00572139	1575	7
		175	0.00441162	1575	0
		176.75	0.00383876	ErrBox	ErrBox
		178.5	0.00330002	1662.5	0
		180.25	0.00274236	1750	0
		182	0.00227088	1750	6
		183.75	0.00193399	1662.5	6
		185.5	0.00166137	1662.5	0
		187.25	0.00137194	ErrBox	ErrBox
		189	0.00119584	1750	0
		190.75	0.00117338	1837.5	0
		192.5	0.00119158	1837.5	5
		194.25	0.00126111	1750	5
		196	0.00165042	1750	0
		197.75	0.0025614	ErrBox	ErrBox
		199.5	0.00384303	1837.5	0
		201.25	0.00518229	1925	0
		203	0.00662033	1925	6
		204.75	0.00840797	1837.5	6
		206.5	0.0109437	1837.5	0
		208.25	0.01354	ErrBox	ErrBox
		210	0.0146885	1925	0
		211.75	0.0144137	2012.5	0
		213.5	0.0139556	2012.5	1
		215.25	0.013817	1925	1
		217	0.0132006	1925	0
		218.75	0.0112708	ErrBox	ErrBox
		220.5	0.0082009	2012.5	0
		222.25	0.00516667	2100	0
		224	0.00329443	2100	3
		225.75	0.00266214	2012.5	3
		227.5	0.00273876	2012.5	0
		229.25	0.00293096	ErrBox	ErrBox
		231	0.00287659	2100	0
		232.75	0.00259947	2187.5	0
		234.5	0.00223912	2187.5	1
		236.25	0.00184734	2100	1
		238	0.00146791	2100	0
		239.75	0.00117553	ErrBox	ErrBox
		241.5	0.00101085	2275	0
		243.25	0.000974667	2362.5	0
		245	0.00103322	2362.5	6
		246.75	0.00114824	2275	6
		248.5	0.00130959	2275	0
		250.25	0.00149513	ErrBox	ErrBox
		252	0.00164047	2362.5	0
		253.75	0.00168841	2450	0
		255.5	0.00162309	2450	2
		257.25	0.0014472	2362.5	2
		259	0.00118074	2362.5	0
		260.75	0.000877748	ErrBox	ErrBox
		262.5	0.000607041	2450	0
		264.25	0.000414249	2537.5	0
		266	0.000306766	2537.5	2
		267.75	0.000264451	2450	2
		269.5	0.000256715	2450	0
		271.25	0.000256654	ErrBox	ErrBox
		273	0.000250179	2537.5	0
		274.75	0.000236122	2625	0
		276.5	0.000218034	2625	5
		278.25	0.00019674	2537.5	5
		280	0.000170458	2537.5	0
		281.75	0.000139268	ErrBox	ErrBox
		283.5	0.000107185	2625	0
		285.25	7.99076e-05	2712.5	0
		287	6.13771e-05	2712.5	4
		288.75	5.22003e-05	2625	4
		290.5	5.0349e-05	2625	0
		292.25	5.28098e-05	ErrBox	ErrBox
		294	5.68804e-05	2712.5	0
		295.75	6.07185e-05	2800	0
		297.5	6.33674e-05	2800	2
		299.25	6.45748e-05	2712.5	2
		301	6.46274e-05	2712.5	0
		302.75	6.42388e-05	ErrBox	ErrBox
		304.5	6.44139e-05	2800	0
		306.25	6.62337e-05	2887.5	0
		308	7.05308e-05	2887.5	1
		309.75	7.75823e-05	2800	1
		311.5	8.70106e-05	2800	0
		313.25	9.79991e-05	ErrBox	ErrBox
		315	0.000109793
		316.75	0.000122228
		318.5	0.000136081
		320.25	0.000153122
		322	0.000175758
		323.75	0.000205913
		325.5	0.000242893
		327.25	0.000281052
		329	0.000309756
		330.75	0.000317815
		332.5	0.000300775
		334.25	0.000265353
		336	0.000226131
		337.75	0.000195938
		339.5	0.000177407
		341.25	0.000163003
		343	0.000143611
		344.75	0.000117335
		346.5	9.03158e-05
		348.25	7.05649e-05
		350	6.24455e-05
		351.75	6.5944e-05
		353.5	7.86134e-05
		355.25	9.71281e-05
		357	0.000118041
		358.75	0.000138455
		360.5	0.000156508
		362.25	0.00017103
		364	0.000180578
		365.75	0.000183093
		367.5	0.000176938
		369.25	0.000162471
		371	0.000142501
		372.75	0.000121078
		374.5	0.00010165
		376.25	8.59696e-05
		378	7.41797e-05
		379.75	6.55677e-05
		381.5	5.9399e-05
		383.25	5.54866e-05
		385	5.44072e-05
		386.75	5.73398e-05
		388.5	6.5563e-05
		390.25	7.9778e-05
		392	9.95578e-05
		393.75	0.000123248
		395.5	0.000148451
		397.25	0.000172926
		399	0.000195408
		400.75	0.000215876
		402.5	0.000234983
		404.25	0.000252988
		406	0.000268847
		407.75	0.00028014
		409.5	0.000284014
		411.25	0.00027866
		413	0.000264475
		414.75	0.000244305
		416.5	0.000222673
		418.25	0.00020452
		420	0.000193969
		421.75	0.000193461
		423.5	0.000203291
		425.25	0.000221554
		427	0.000244546
		428.75	0.000267656
		430.5	0.000286565
		432.25	0.000298348
		434	0.000302107
		435.75	0.000298899
		437.5	0.000291106
		439.25	0.000281532
		441	0.000272538
		442.75	0.000265456
		444.5	0.000260359
		446.25	0.000256202
		448	0.00025127
		449.75	0.000243772
		451.5	0.000232417
		453.25	0.00021678
		455	0.000197374
		456.75	0.000175471
		458.5	0.000152753
		460.25	0.000130946
		462	0.000111504
		463.75	9.53849e-05
		465.5	8.29536e-05
		467.25	7.39829e-05
		469	6.77863e-05
		470.75	6.34568e-05
		472.5	6.01393e-05
		474.25	5.7279e-05
		476	5.47628e-05
		477.75	5.29131e-05
		479.5	5.23361e-05
		481.25	5.36811e-05
		483	5.73751e-05
		484.75	6.34269e-05
		486.5	7.13511e-05
		488.25	8.02406e-05
		490	8.89712e-05
		491.75	9.64631e-05
		493.5	0.000101947
		495.25	0.000105133
		497	0.000106242
		498.75	0.000105903
		500.5	0.000104952
		502.25	0.000104229
		504	0.000104412
		505.75	0.000105949
		507.5	0.000109074
		509.25	0.00011387
		511	0.000120311
		512.75	0.00012825
		514.5	0.000137313
		516.25	0.000146734
		518	0.000155231
		519.75	0.000161085
		521.5	0.000162514
		523.25	0.000158289
		525	0.000148321
		526.75	0.000133886
		528.5	0.000117306
		530.25	0.000101201
		532	8.76669e-05
		533.75	7.77907e-05
		535.5	7.16229e-05
		537.25	6.85151e-05
		539	6.75563e-05
		540.75	6.7888e-05
		542.5	6.88207e-05
		544.25	6.98032e-05
		546	7.03516e-05
		547.75	7.00128e-05
		549.5	6.84027e-05
		551.25	6.52739e-05
		553	6.05894e-05
		554.75	5.45448e-05
		556.5	4.75452e-05
		558.25	4.01244e-05
		560	3.28519e-05
		561.75	2.6247e-05
		563.5	2.07215e-05
		565.25	1.65551e-05
		567	1.38989e-05
		568.75	1.27927e-05
		570.5	1.31843e-05
		572.25	1.49433e-05
		574	1.78637e-05
		575.75	2.16705e-05
		577.5	2.60293e-05
		579.25	3.05766e-05
		581	3.49548e-05
		582.75	3.88579e-05
		584.5	4.20761e-05
		586.25	4.45152e-05
		588	4.61947e-05
		589.75	4.72243e-05
		591.5	4.77645e-05
		593.25	4.79938e-05
		595	4.80907e-05
		596.75	4.82268e-05
		598.5	4.85787e-05
		600.25	4.93336e-05
		602	5.06817e-05
		603.75	5.27877e-05
		605.5	5.57468e-05
		607.25	5.95369e-05
		609	6.39855e-05
		610.75	6.87646e-05
		612.5	7.34202e-05
		614.25	7.74323e-05
		616	8.02888e-05
		617.75	8.15665e-05
		619.5	8.09905e-05
		621.25	7.84707e-05
		623	7.41071e-05
		624.75	6.8169e-05
		626.5	6.10494e-05
		628.25	5.32136e-05
		630	4.51379e-05
		631.75	3.72625e-05
		633.5	2.99503e-05
		635.25	2.34639e-05
		637	1.796e-05
		638.75	1.3495e-05
		640.5	1.0051e-05
		642.25	7.55486e-06
		644	5.90992e-06
		645.75	5.01858e-06
		647.5	4.80013e-06
		649.25	5.20067e-06
		651	6.19499e-06
		652.75	7.78118e-06
		654.5	9.96944e-06
		656.25	1.27666e-05
		658	1.61607e-05
		659.75	2.01023e-05
		661.5	2.44939e-05
		663.25	2.91826e-05
		665	3.39607e-05
		666.75	3.85758e-05
		668.5	4.27536e-05
		670.25	4.62167e-05
		672	4.87199e-05
		673.75	5.00767e-05
		675.5	5.01825e-05
		677.25	4.90278e-05
		679	4.66997e-05
		680.75	4.3371e-05
		682.5	3.92793e-05
		684.25	3.47e-05
		686	2.99133e-05
		687.75	2.51781e-05
		689.5	2.07132e-05
		691.25	1.66788e-05
		693	1.31785e-05
		694.75	1.02576e-05
		696.5	7.9155e-06
		698.25	6.12192e-06
		700	4.82632e-06
		701.75	3.97565e-06
		703.5	3.52377e-06
		705.25	3.44022e-06
		707	3.71524e-06
		708.75	4.36194e-06
		710.5	5.41559e-06
		712.25	6.93062e-06
		714	8.97595e-06
		715.75	1.16248e-05
		717.5	1.49497e-05
		719.25	1.90066e-05
		721	2.38225e-05
		722.75	2.93761e-05
		724.5	3.55886e-05
		726.25	4.23074e-05
		728	4.92995e-05
		729.75	5.62545e-05
		731.5	6.28029e-05
		733.25	6.85475e-05
		735	7.31077e-05
		736.75	7.61736e-05
		738.5	7.75546e-05
		740.25	7.7225e-05
		742	7.53412e-05
		743.75	7.22366e-05
		745.5	6.83869e-05
		747.25	6.43536e-05
		749	6.07102e-05
		750.75	5.79709e-05
		752.5	5.65276e-05
		754.25	5.66042e-05
		756	5.8236e-05
		757.75	6.12744e-05
		759.5	6.54119e-05
		761.25	7.02253e-05
		763	7.52245e-05
		764.75	7.99099e-05
		766.5	8.38198e-05
		768.25	8.65733e-05
		770	8.79026e-05
		771.75	8.76673e-05
		773.5	8.58543e-05
		775.25	8.25707e-05
		777	7.80176e-05
		778.75	7.24671e-05
		780.5	6.6229e-05
		782.25	5.96224e-05
		784	5.29533e-05
		785.75	4.6493e-05
		787.5	4.04675e-05
		789.25	3.50527e-05
		791	3.03762e-05
		792.75	2.65159e-05
		794.5	2.35108e-05
		796.25	2.13614e-05
		798	2.00411e-05
		799.75	1.94969e-05
		801.5	1.96569e-05
		803.25	2.04318e-05
		805	2.17191e-05
		806.75	2.34069e-05
		808.5	2.53785e-05
		810.25	2.75173e-05
		812	2.9713e-05
		813.75	3.18676e-05
		815.5	3.39011e-05
		817.25	3.57566e-05
		819	3.74052e-05
		820.75	3.88444e-05
		822.5	4.00998e-05
		824.25	4.12239e-05
		826	4.22843e-05
		827.75	4.33617e-05
		829.5	4.45416e-05
		831.25	4.59013e-05
		833	4.75039e-05
		834.75	4.93906e-05
		836.5	5.15725e-05
		838.25	5.40336e-05
		840	5.67293e-05
		841.75	5.95934e-05
		843.5	6.25476e-05
		845.25	6.55126e-05
		847	6.84176e-05
		848.75	7.12069e-05
		850.5	7.3838e-05
		852.25	7.62764e-05
		854	7.84802e-05
		855.75	8.03851e-05
		857.5	8.18854e-05
		859.25	8.28378e-05
		861	8.30665e-05
		862.75	8.23896e-05
		864.5	8.06548e-05
		866.25	7.7779e-05
		868	7.37797e-05
		869.75	6.87891e-05
		871.5	6.30467e-05
		873.25	5.68696e-05
		875	5.06085e-05
		876.75	4.46011e-05
		878.5	3.91275e-05
		880.25	3.43849e-05
		882	3.04769e-05
		883.75	2.74205e-05
		885.5	2.51634e-05
		887.25	2.36086e-05
		889	2.26346e-05
		890.75	2.21176e-05
		892.5	2.19401e-05
		894.25	2.2002e-05
		896	2.22182e-05
		897.75	2.25238e-05
		899.5	2.28644e-05
		901.25	2.32005e-05
		903	2.35023e-05
		904.75	2.37478e-05
		906.5	2.39246e-05
		908.25	2.4024e-05
		910	2.40466e-05
		911.75	2.39967e-05
		913.5	2.38845e-05
		915.25	2.37275e-05
		917	2.35461e-05
		918.75	2.3364e-05
		920.5	2.32104e-05
		922.25	2.31166e-05
		924	2.31157e-05
		925.75	2.3242e-05
		927.5	2.35274e-05
		929.25	2.40044e-05
		931	2.46987e-05
		932.75	2.56321e-05
		934.5	2.682e-05
		936.25	2.82668e-05
		938	2.99675e-05
		939.75	3.19051e-05
		941.5	3.40512e-05
		943.25	3.63655e-05
		945	3.87972e-05
		946.75	4.1287e-05
		948.5	4.37706e-05
		950.25	4.61801e-05
		952	4.84491e-05
		953.75	5.05192e-05
		955.5	5.23391e-05
		957.25	5.38706e-05
		959	5.50919e-05
		960.75	5.59977e-05
		962.5	5.65973e-05
		964.25	5.69173e-05
		966	5.69964e-05
		967.75	5.68829e-05
		969.5	5.66301e-05
		971.25	5.62926e-05
		973	5.59221e-05
		974.75	5.55611e-05
		976.5	5.52437e-05
		978.25	5.49909e-05
		980	5.48105e-05
		981.75	5.4697e-05
		983.5	5.46334e-05
		985.25	5.45932e-05
		987	5.45437e-05
		988.75	5.44491e-05
		990.5	5.42738e-05
		992.25	5.39877e-05
		994	5.35654e-05
		995.75	5.2991e-05
		997.5	5.22592e-05
		999.25	5.13726e-05
		1001	5.03455e-05
		1002.75	4.91998e-05
		1004.5	4.79638e-05
		1006.25	4.66696e-05
		1008	4.53511e-05
		1009.75	4.40417e-05
		1011.5	4.2772e-05
		1013.25	4.15682e-05
		1015	4.04517e-05
		1016.75	3.94375e-05
		1018.5	3.8535e-05
		1020.25	3.77481e-05
		1022	3.7075e-05
		1023.75	3.65122e-05
		1025.5	3.60508e-05
		1027.25	3.56809e-05
		1029	3.53916e-05
		1030.75	3.51716e-05
		1032.5	3.50102e-05
		1034.25	3.48973e-05
		1036	3.4824e-05
		1037.75	3.47826e-05
		1039.5	3.47668e-05
		1041.25	3.47713e-05
		1043	3.47921e-05
		1044.75	3.48254e-05
		1046.5	3.48703e-05
		1048.25	3.4924e-05
		1050	3.49856e-05
		1051.75	3.50539e-05
		1053.5	3.51284e-05
		1055.25	3.52087e-05
		1057	3.52944e-05
		1058.75	3.53851e-05
		1060.5	3.54799e-05
		1062.25	3.55802e-05
		1064	3.56845e-05
		1065.75	3.57927e-05
		1067.5	3.59045e-05
		1069.25	3.60194e-05
		1071	3.61372e-05
		1072.75	3.62575e-05
		1074.5	3.63799e-05
		1076.25	3.6504e-05
		1078	3.66295e-05
		1079.75	3.67559e-05
		1081.5	3.68829e-05
		1083.25	3.70101e-05
		1085	3.71372e-05
		1086.75	3.72638e-05
		1088.5	3.73896e-05
		1090.25	3.75144e-05
		1092	3.76384e-05
		1093.75	3.77603e-05
		1095.5	3.78802e-05
		1097.25	3.79982e-05
		1099	3.81139e-05
		1100.75	3.82273e-05
		1102.5	3.83381e-05
		1104.25	3.84463e-05
		1106	3.85517e-05
		1107.75	3.86544e-05
		1109.5	3.87542e-05
		1111.25	3.8851e-05
		1113	3.8945e-05
		1114.75	3.90359e-05
		1116.5	3.9124e-05
		1118.25	3.92091e-05
		1120	3.92913e-05
		1121.75	3.93706e-05
		1123.5	3.94471e-05
		1125.25	3.95208e-05
		1127	3.95918e-05
		1128.75	3.96602e-05
		1130.5	3.97259e-05
		1132.25	3.97892e-05
		1134	3.985e-05
		1135.75	3.99091e-05
		1137.5	3.99654e-05
		1139.25	4.00194e-05
		1141	4.00713e-05
		1142.75	4.01211e-05
		1144.5	4.0169e-05
		1146.25	4.02144e-05
		1148	4.02587e-05
		1149.75	4.03012e-05
		1151.5	4.03421e-05
		1153.25	4.03814e-05
		1155	4.04191e-05
		1156.75	4.0456e-05
		1158.5	4.04908e-05
		1160.25	4.05243e-05
		1162	4.05565e-05
		1163.75	4.05873e-05
		1165.5	4.0617e-05
		1167.25	4.06454e-05
		1169	4.06727e-05
		1170.75	4.06989e-05
		1172.5	4.07239e-05
		1174.25	4.07479e-05
		1176	4.07707e-05
		1177.75	4.07925e-05
		1179.5	4.08132e-05
		1181.25	4.08328e-05
		1183	4.08513e-05
		1184.75	4.08687e-05
		1186.5	4.08849e-05
		1188.25	4.09001e-05
		1190	4.09147e-05
		1191.75	4.09275e-05
		1193.5	4.0939e-05
		1195.25	4.09493e-05
		1197	4.09582e-05
		1198.75	4.09658e-05
		1200.5	4.09719e-05
		1202.25	4.09766e-05
		1204	4.09797e-05
		1205.75	4.09811e-05
		1207.5	4.09809e-05
		1209.25	4.0979e-05
		1211	4.09752e-05
		1212.75	4.09695e-05
		1214.5	4.09619e-05
		1216.25	4.09522e-05
		1218	4.09403e-05
		1219.75	4.09263e-05
		1221.5	4.09099e-05
		1223.25	4.08912e-05
		1225	4.087e-05
		1226.75	4.08462e-05
		1228.5	4.08205e-05
		1230.25	4.07914e-05
		1232	4.07595e-05
		1233.75	4.07247e-05
		1235.5	4.06869e-05
		1237.25	4.0646e-05
		1239	4.0602e-05
		1240.75	4.05547e-05
		1242.5	4.05041e-05
		1244.25	4.04501e-05
		1246	4.03927e-05
		1247.75	4.03317e-05
		1249.5	4.02671e-05
		1251.25	4.01988e-05
		1253	4.01268e-05
		1254.75	4.00516e-05
		1256.5	3.99719e-05
		1258.25	3.98883e-05
		1260	3.98008e-05
		1261.75	3.97092e-05
		1263.5	3.96136e-05
		1265.25	3.95138e-05
		1267	3.94099e-05
		1268.75	3.93019e-05
		1270.5	3.91896e-05
		1272.25	3.90731e-05
		1274	3.89531e-05
		1275.75	3.88282e-05
		1277.5	3.86991e-05
		1279.25	3.85657e-05
		1281	3.8428e-05
		1282.75	3.82861e-05
		1284.5	3.814e-05
		1286.25	3.79897e-05
		1288	3.78352e-05
		1289.75	3.76766e-05
		1291.5	3.75138e-05
		1293.25	3.7347e-05
		1295	3.71761e-05
		1296.75	3.70013e-05
		1298.5	3.68239e-05
		1300.25	3.66414e-05
		1302	3.64551e-05
		1303.75	3.62644e-05
		1305.5	3.60708e-05
		1307.25	3.58736e-05
		1309	3.56737e-05
		1310.75	3.54697e-05
		1312.5	3.52631e-05
		1314.25	3.50528e-05
		1316	3.48393e-05
		1317.75	3.46229e-05
		1319.5	3.44036e-05
		1321.25	3.41815e-05
		1323	3.39569e-05
		1324.75	3.37297e-05
		1326.5	3.35009e-05
		1328.25	3.32692e-05
		1330	3.30354e-05
		1331.75	3.27996e-05
		1333.5	3.25627e-05
		1335.25	3.23235e-05
		1337	3.20827e-05
		1338.75	3.18406e-05
		1340.5	3.15979e-05
		1342.25	3.13535e-05
		1344	3.11082e-05
		1345.75	3.08621e-05
		1347.5	3.06154e-05
		1349.25	3.03682e-05
		1351	3.01207e-05
		1352.75	2.98731e-05
		1354.5	2.96255e-05
		1356.25	2.93781e-05
		1358	2.91311e-05
		1359.75	2.88845e-05
		1361.5	2.86386e-05
		1363.25	2.8393e-05
		1365	2.8149e-05
		1366.75	2.79061e-05
		1368.5	2.76646e-05
		1370.25	2.74245e-05
		1372	2.71861e-05
		1373.75	2.69495e-05
		1375.5	2.67148e-05
		1377.25	2.64816e-05
		1379	2.62513e-05
		1380.75	2.60235e-05
		1382.5	2.57982e-05
		1384.25	2.55756e-05
		1386	2.53559e-05
		1387.75	2.51392e-05
		1389.5	2.49257e-05
		1391.25	2.47154e-05
		1393	2.4508e-05
		1394.75	2.43048e-05
		1396.5	2.41047e-05
		1398.25	2.39091e-05
		1400	2.37175e-05
		1401.75	2.353e-05
		1403.5	2.33461e-05
		1405.25	2.31672e-05
		1407	2.29934e-05
		1408.75	2.28236e-05
		1410.5	2.26585e-05
		1412.25	2.24981e-05
		1414	2.23427e-05
		1415.75	2.21923e-05
		1417.5	2.20471e-05
		1419.25	2.19077e-05
		1421	2.17731e-05
		1422.75	2.16445e-05
		1424.5	2.15202e-05
		1426.25	2.14021e-05
		1428	2.12905e-05
		1429.75	2.1184e-05
		1431.5	2.10833e-05
		1433.25	2.09886e-05
		1435	2.08998e-05
		1436.75	2.08165e-05
		1438.5	2.07399e-05
		1440.25	2.06696e-05
		1442	2.06055e-05
		1443.75	2.05476e-05
		1445.5	2.04961e-05
		1447.25	2.0451e-05
		1449	2.04123e-05
		1450.75	2.03808e-05
		1452.5	2.03551e-05
		1454.25	2.0336e-05
		1456	2.03234e-05
		1457.75	2.03174e-05
		1459.5	2.03181e-05
		1461.25	2.03253e-05
		1463	2.03392e-05
		1464.75	2.03597e-05
		1466.5	2.03868e-05
		1468.25	2.04206e-05
		1470	2.0461e-05
		1471.75	2.05074e-05
		1473.5	2.05611e-05
		1475.25	2.06215e-05
		1477	2.06883e-05
		1478.75	2.07618e-05
		1480.5	2.08417e-05
		1482.25	2.09288e-05
		1484	2.10218e-05
		1485.75	2.11211e-05
		1487.5	2.12269e-05
		1489.25	2.13382e-05
		1491	2.14565e-05
		1492.75	2.15804e-05
		1494.5	2.17111e-05
		1496.25	2.18479e-05
		1498	2.19906e-05
		1499.75	2.21392e-05
		1501.5	2.22936e-05
		1503.25	2.24537e-05
		1505	2.26202e-05
		1506.75	2.27916e-05
		1508.5	2.29684e-05
		1510.25	2.31505e-05
		1512	2.33379e-05
		1513.75	2.35304e-05
		1515.5	2.37279e-05
		1517.25	2.39302e-05
		1519	2.41373e-05
		1520.75	2.4349e-05
		1522.5	2.45652e-05
		1524.25	2.4785e-05
		1526	2.50098e-05
		1527.75	2.52386e-05
		1529.5	2.54713e-05
		1531.25	2.5707e-05
		1533	2.59471e-05
		1534.75	2.61905e-05
		1536.5	2.64372e-05
		1538.25	2.6687e-05
		1540	2.69397e-05
		1541.75	2.71952e-05
		1543.5	2.74525e-05
		1545.25	2.77129e-05
		1547	2.79755e-05
		1548.75	2.82401e-05
		1550.5	2.85066e-05
		1552.25	2.87741e-05
		1554	2.90437e-05
		1555.75	2.93152e-05
		1557.5	2.95872e-05
		1559.25	2.98601e-05
		1561	3.01337e-05
		1562.75	3.04078e-05
		1564.5	3.06822e-05
		1566.25	3.09568e-05
		1568	3.12312e-05
		1569.75	3.15054e-05
		1571.5	3.17791e-05
		1573.25	3.20522e-05
		1575	3.23245e-05
		1576.75	3.25957e-05
		1578.5	3.28657e-05
		1580.25	3.31343e-05
		1582	3.34013e-05
		1583.75	3.36666e-05
		1585.5	3.39299e-05
		1587.25	3.41911e-05
		1589	3.44494e-05
		1590.75	3.47059e-05
		1592.5	3.49598e-05
		1594.25	3.52109e-05
		1596	3.5459e-05
		1597.75	3.5704e-05
		1599.5	3.59458e-05
		1601.25	3.61841e-05
		1603	3.64196e-05
		1604.75	3.66508e-05
		1606.5	3.68782e-05
		1608.25	3.71017e-05
		1610	3.73205e-05
		1611.75	3.75357e-05
		1613.5	3.77467e-05
		1615.25	3.79531e-05
		1617	3.81551e-05
		1618.75	3.83524e-05
		1620.5	3.8545e-05
		1622.25	3.87327e-05
		1624	3.89162e-05
		1625.75	3.90941e-05
		1627.5	3.9267e-05
		1629.25	3.94347e-05
		1631	3.95972e-05
		1632.75	3.97545e-05
		1634.5	3.99064e-05
		1636.25	4.0053e-05
		1638	4.01942e-05
		1639.75	4.03299e-05
		1641.5	4.04602e-05
		1643.25	4.0585e-05
		1645	4.07042e-05
		1646.75	4.08179e-05
		1648.5	4.09261e-05
		1650.25	4.10286e-05
		1652	4.11256e-05
		1653.75	4.12171e-05
		1655.5	4.13029e-05
		1657.25	4.13832e-05
		1659	4.14573e-05
		1660.75	4.15266e-05
		1662.5	4.15904e-05
		1664.25	4.16493e-05
		1666	4.17022e-05
		1667.75	4.17496e-05
		1669.5	4.1791e-05
		1671.25	4.18278e-05
		1673	4.18592e-05
		1674.75	4.18854e-05
		1676.5	4.19063e-05
		1678.25	4.19221e-05
		1680	4.19327e-05
		1681.75	4.19383e-05
		1683.5	4.19389e-05
		1685.25	4.19346e-05
		1687	4.19253e-05
		1688.75	4.19113e-05
		1690.5	4.18925e-05
		1692.25	4.18691e-05
		1694	4.1841e-05
		1695.75	4.18085e-05
		1697.5	4.17714e-05
		1699.25	4.173e-05
		1701	4.16842e-05
		1702.75	4.16343e-05
		1704.5	4.15801e-05
		1706.25	4.15213e-05
		1708	4.14591e-05
		1709.75	4.13924e-05
		1711.5	4.13226e-05
		1713.25	4.1249e-05
		1715	4.11717e-05
		1716.75	4.10908e-05
		1718.5	4.10065e-05
		1720.25	4.09187e-05
		1722	4.08276e-05
		1723.75	4.07332e-05
		1725.5	4.06356e-05
		1727.25	4.0535e-05
		1729	4.04307e-05
		1730.75	4.03242e-05
		1732.5	4.02148e-05
		1734.25	4.01021e-05
		1736	3.99873e-05
		1737.75	3.987e-05
		1739.5	3.97509e-05
		1741.25	3.96287e-05
		1743	3.95041e-05
		1744.75	3.93773e-05
		1746.5	3.92483e-05
		1748.25	3.91173e-05
		1750	3.89842e-05
		1751.75	3.88491e-05
		1753.5	3.87123e-05
		1755.25	3.85736e-05
		1757	3.84332e-05
		1758.75	3.82912e-05
		1760.5	3.81477e-05
		1762.25	3.80027e-05
		1764	3.78563e-05
		1765.75	3.77086e-05
		1767.5	3.75596e-05
		1769.25	3.74095e-05
		1771	3.72576e-05
		1772.75	3.7106e-05
		1774.5	3.69529e-05
		1776.25	3.67989e-05
		1778	3.66441e-05
		1779.75	3.64885e-05
		1781.5	3.63323e-05
		1783.25	3.61754e-05
		1785	3.6018e-05
		1786.75	3.58601e-05
		1788.5	3.57018e-05
		1790.25	3.55432e-05
		1792	3.53842e-05
		1793.75	3.52251e-05
		1795.5	3.50658e-05
		1797.25	3.49063e-05
		1799	3.47468e-05
		1800.75	3.45874e-05
		1802.5	3.44279e-05
		1804.25	3.42686e-05
		1806	3.41095e-05
		1807.75	3.39506e-05
		1809.5	3.37919e-05
		1811.25	3.36336e-05
		1813	3.34756e-05
		1814.75	3.3318e-05
		1816.5	3.31609e-05
		1818.25	3.30042e-05
		1820	3.28481e-05
		1821.75	3.26925e-05
		1823.5	3.25375e-05
		1825.25	3.23831e-05
		1827	3.22293e-05
		1828.75	3.20763e-05
		1830.5	3.19239e-05
		1832.25	3.17722e-05
		1834	3.16213e-05
		1835.75	3.14711e-05
		1837.5	3.13216e-05
		1839.25	3.11729e-05
		1841	3.1025e-05
		1842.75	3.08779e-05
		1844.5	3.07315e-05
		1846.25	3.0586e-05
		1848	3.04412e-05
		1849.75	3.02971e-05
		1851.5	3.01551e-05
		1853.25	3.00141e-05
		1855	2.98753e-05
		1856.75	2.97401e-05
		1858.5	2.9611e-05
		1860.25	2.94921e-05
		1862	2.939e-05
		1863.75	2.93153e-05
		1865.5	2.92847e-05
		1867.25	2.93197e-05
		1869	2.94518e-05
		1870.75	2.9721e-05
		1872.5	3.01762e-05
		1874.25	3.08731e-05
		1876	3.18697e-05
		1877.75	3.32205e-05
		1879.5	3.49675e-05
		1881.25	3.71316e-05
		1883	3.9703e-05
		1884.75	4.26388e-05
		1886.5	4.58571e-05
		1888.25	4.92456e-05
		1890	5.2667e-05
		1891.75	5.59774e-05
		1893.5	5.90373e-05
		1895.25	6.17278e-05
		1897	6.39546e-05
		1898.75	6.56525e-05
		1900.5	6.67811e-05
		1902.25	6.73179e-05
		1904	6.72511e-05
		1905.75	6.65752e-05
		1907.5	6.52917e-05
		1909.25	6.34147e-05
		1911	6.09788e-05
		1912.75	5.8047e-05
		1914.5	5.4714e-05
		1916.25	5.11036e-05
		1918	4.7362e-05
		1919.75	4.36406e-05
		1921.5	4.00826e-05
		1923.25	3.68077e-05
		1925	3.39017e-05
		1926.75	3.14122e-05
		1928.5	2.93492e-05
		1930.25	2.7692e-05
		1932	2.6397e-05
		1933.75	2.5409e-05
		1935.5	2.46664e-05
		1937.25	2.41121e-05
		1939	2.36971e-05
		1940.75	2.33795e-05
		1942.5	2.31272e-05
		1944.25	2.29185e-05
		1946	2.27363e-05
		1947.75	2.25699e-05
		1949.5	2.24128e-05
		1951.25	2.22607e-05
		1953	2.21114e-05
		1954.75	2.19635e-05
		1956.5	2.18158e-05
		1958.25	2.16694e-05
		1960	2.15224e-05
		1961.75	2.13756e-05
		1963.5	2.12298e-05
		1965.25	2.10842e-05
		1967	2.09389e-05
		1968.75	2.0794e-05
		1970.5	2.06489e-05
		1972.25	2.05044e-05
		1974	2.03612e-05
		1975.75	2.02186e-05
		1977.5	2.00766e-05
		1979.25	1.99355e-05
		1981	1.97951e-05
		1982.75	1.96556e-05
		1984.5	1.9517e-05
		1986.25	1.93801e-05
		1988	1.92436e-05
		1989.75	1.91082e-05
		1991.5	1.89739e-05
		1993.25	1.88408e-05
		1995	1.87089e-05
		1996.75	1.85784e-05
		1998.5	1.84492e-05
		2000.25	1.83214e-05
		2002	1.81949e-05
		2003.75	1.80698e-05
		2005.5	1.79462e-05
		2007.25	1.7824e-05
		2009	1.77033e-05
		2010.75	1.75841e-05
		2012.5	1.74664e-05
		2014.25	1.73502e-05
		2016	1.72355e-05
		2017.75	1.71223e-05
		2019.5	1.70114e-05
		2021.25	1.69013e-05
		2023	1.67928e-05
		2024.75	1.66857e-05
		2026.5	1.65802e-05
		2028.25	1.64755e-05
		2030	1.6373e-05
		2031.75	1.62719e-05
		2033.5	1.61722e-05
		2035.25	1.60739e-05
		2037	1.5977e-05
		2038.75	1.58808e-05
		2040.5	1.57866e-05
		2042.25	1.56937e-05
		2044	1.56027e-05
		2045.75	1.55123e-05
		2047.5	1.54231e-05
		2049.25	1.53357e-05
		2051	1.52488e-05
		2052.75	1.51637e-05
		2054.5	1.50789e-05
		2056.25	1.49952e-05
		2058	1.49124e-05
		2059.75	1.48306e-05
		2061.5	1.47497e-05
		2063.25	1.46697e-05
		2065	1.45905e-05
		2066.75	1.45122e-05
		2068.5	1.44346e-05
		2070.25	1.43577e-05
		2072	1.42817e-05
		2073.75	1.42063e-05
		2075.5	1.41316e-05
		2077.25	1.40576e-05
		2079	1.39842e-05
		2080.75	1.39115e-05
		2082.5	1.38401e-05
		2084.25	1.37688e-05
		2086	1.3698e-05
		2087.75	1.36279e-05
		2089.5	1.35577e-05
		2091.25	1.3489e-05
		2093	1.34215e-05
		2094.75	1.33541e-05
		2096.5	1.32874e-05
		2098.25	1.32213e-05
		2100	1.31561e-05
		2101.75	1.30915e-05
		2103.5	1.30278e-05
		2105.25	1.29649e-05
		2107	1.29029e-05
		2108.75	1.28424e-05
		2110.5	1.27823e-05
		2112.25	1.27232e-05
		2114	1.26651e-05
		2115.75	1.26082e-05
		2117.5	1.25512e-05
		2119.25	1.24968e-05
		2121	1.24437e-05
		2122.75	1.23919e-05
		2124.5	1.23416e-05
		2126.25	1.22928e-05
		2128	1.22456e-05
		2129.75	1.22001e-05
		2131.5	1.21563e-05
		2133.25	1.21143e-05
		2135	1.20742e-05
		2136.75	1.2036e-05
		2138.5	1.2e-05
		2140.25	1.19661e-05
		2142	1.19344e-05
		2143.75	1.19045e-05
		2145.5	1.18776e-05
		2147.25	1.18532e-05
		2149	1.18314e-05
		2150.75	1.18123e-05
		2152.5	1.17959e-05
		2154.25	1.17824e-05
		2156	1.17718e-05
		2157.75	1.17642e-05
		2159.5	1.1759e-05
		2161.25	1.17576e-05
		2163	1.17595e-05
		2164.75	1.17647e-05
		2166.5	1.1774e-05
		2168.25	1.17861e-05
		2170	1.18017e-05
		2171.75	1.18209e-05
		2173.5	1.18437e-05
		2175.25	1.18703e-05
		2177	1.19006e-05
		2178.75	1.19347e-05
		2180.5	1.19726e-05
		2182.25	1.20145e-05
		2184	1.20603e-05
		2185.75	1.211e-05
		2187.5	1.21638e-05
		2189.25	1.22216e-05
		2191	1.22834e-05
		2192.75	1.23493e-05
		2194.5	1.24192e-05
		2196.25	1.24933e-05
		2198	1.25714e-05
		2199.75	1.26535e-05
		2201.5	1.27397e-05
		2203.25	1.283e-05
		2205	1.29242e-05
		2206.75	1.30225e-05
		2208.5	1.31246e-05
		2210.25	1.32307e-05
		2212	1.334e-05
		2213.75	1.34538e-05
		2215.5	1.35721e-05
		2217.25	1.36927e-05
		2219	1.38177e-05
		2220.75	1.39455e-05
		2222.5	1.40775e-05
		2224.25	1.42129e-05
		2226	1.43515e-05
		2227.75	1.44934e-05
		2229.5	1.46383e-05
		2231.25	1.47861e-05
		2233	1.49376e-05
		2234.75	1.50911e-05
		2236.5	1.52479e-05
		2238.25	1.54066e-05
		2240	1.55677e-05
		2241.75	1.57309e-05
		2243.5	1.58963e-05
		2245.25	1.60629e-05
		2247	1.6232e-05
		2248.75	1.64028e-05
		2250.5	1.65749e-05
		2252.25	1.67484e-05
		2254	1.6923e-05
		2255.75	1.70986e-05
		2257.5	1.7275e-05
		2259.25	1.74519e-05
		2261	1.76287e-05
		2262.75	1.78064e-05
		2264.5	1.79849e-05
		2266.25	1.8162e-05
		2268	1.83395e-05
		2269.75	1.85165e-05
		2271.5	1.86929e-05
		2273.25	1.88684e-05
		2275	1.90429e-05
		2276.75	1.92162e-05
		2278.5	1.93881e-05
		2280.25	1.95584e-05
		2282	1.9727e-05
		2283.75	1.98936e-05
		2285.5	2.00582e-05
		2287.25	2.02204e-05
		2289	2.03802e-05
		2290.75	2.05367e-05
		2292.5	2.0691e-05
		2294.25	2.08424e-05
		2296	2.09907e-05
		2297.75	2.11357e-05
		2299.5	2.12773e-05
		2301.25	2.14154e-05
		2303	2.15497e-05
		2304.75	2.16801e-05
		2306.5	2.18066e-05
		2308.25	2.19291e-05
		2310	2.20473e-05
		2311.75	2.21611e-05
		2313.5	2.22706e-05
		2315.25	2.23763e-05
		2317	2.24767e-05
		2318.75	2.25724e-05
		2320.5	2.26641e-05
		2322.25	2.27503e-05
		2324	2.28317e-05
		2325.75	2.29082e-05
		2327.5	2.29791e-05
		2329.25	2.30457e-05
		2331	2.31073e-05
		2332.75	2.31639e-05
		2334.5	2.32154e-05
		2336.25	2.3262e-05
		2338	2.33036e-05
		2339.75	2.33395e-05
		2341.5	2.33712e-05
		2343.25	2.3398e-05
		2345	2.34199e-05
		2346.75	2.34371e-05
		2348.5	2.34495e-05
		2350.25	2.34572e-05
		2352	2.34611e-05
		2353.75	2.34599e-05
		2355.5	2.34543e-05
		2357.25	2.34445e-05
		2359	2.34304e-05
		2360.75	2.34124e-05
		2362.5	2.33905e-05
		2364.25	2.33648e-05
		2366	2.33355e-05
		2367.75	2.33027e-05
		2369.5	2.32666e-05
		2371.25	2.32274e-05
		2373	2.31852e-05
		2374.75	2.31402e-05
		2376.5	2.30925e-05
		2378.25	2.30425e-05
		2380	2.29901e-05
		2381.75	2.29357e-05
		2383.5	2.28794e-05
		2385.25	2.28207e-05
		2387	2.27613e-05
		2388.75	2.27005e-05
		2390.5	2.26387e-05
		2392.25	2.2576e-05
		2394	2.25126e-05
		2395.75	2.24487e-05
		2397.5	2.2384e-05
		2399.25	2.23198e-05
		2401	2.22558e-05
		2402.75	2.21921e-05
		2404.5	2.21283e-05
		2406.25	2.20659e-05
		2408	2.20044e-05
		2409.75	2.19441e-05
		2411.5	2.18851e-05
		2413.25	2.18275e-05
		2415	2.17717e-05
		2416.75	2.17177e-05
		2418.5	2.16658e-05
		2420.25	2.16168e-05
		2422	2.15695e-05
		2423.75	2.15248e-05
		2425.5	2.14827e-05
		2427.25	2.14435e-05
		2429	2.14074e-05
		2430.75	2.13743e-05
		2432.5	2.13445e-05
		2434.25	2.1318e-05
		2436	2.12951e-05
		2437.75	2.12757e-05
		2439.5	2.12601e-05
		2441.25	2.12483e-05
		2443	2.12403e-05
		2444.75	2.12363e-05
		2446.5	2.12363e-05
		2448.25	2.12405e-05
		2450	2.12487e-05
		2451.75	2.12612e-05
		2453.5	2.12779e-05
		2455.25	2.12989e-05
		2457	2.13242e-05
		2458.75	2.13537e-05
		2460.5	2.13876e-05
		2462.25	2.14258e-05
		2464	2.14682e-05
		2465.75	2.1515e-05
		2467.5	2.15659e-05
		2469.25	2.16212e-05
		2471	2.16805e-05
		2472.75	2.1744e-05
		2474.5	2.18116e-05
		2476.25	2.18832e-05
		2478	2.19587e-05
		2479.75	2.20381e-05
		2481.5	2.21212e-05
		2483.25	2.22081e-05
		2485	2.22985e-05
		2486.75	2.23924e-05
		2488.5	2.24896e-05
		2490.25	2.25902e-05
		2492	2.26938e-05
		2493.75	2.28005e-05
		2495.5	2.29101e-05
		2497.25	2.30224e-05
		2499	2.31373e-05
		2500.75	2.32546e-05
		2502.5	2.33743e-05
		2504.25	2.34961e-05
		2506	2.362e-05
		2507.75	2.37457e-05
		2509.5	2.3873e-05
		2511.25	2.40019e-05
		2513	2.41321e-05
		2514.75	2.42636e-05
		2516.5	2.4396e-05
		2518.25	2.45292e-05
		2520	2.46625e-05
		2521.75	2.4797e-05
		2523.5	2.49317e-05
		2525.25	2.50666e-05
		2527	2.52015e-05
		2528.75	2.53361e-05
		2530.5	2.54703e-05
		2532.25	2.56039e-05
		2534	2.57368e-05
		2535.75	2.58688e-05
		2537.5	2.60003e-05
		2539.25	2.613e-05
		2541	2.62582e-05
		2542.75	2.63848e-05
		2544.5	2.65097e-05
		2546.25	2.66326e-05
		2548	2.67534e-05
		2549.75	2.68719e-05
		2551.5	2.69881e-05
		2553.25	2.71016e-05
		2555	2.72125e-05
		2556.75	2.73205e-05
		2558.5	2.74254e-05
		2560.25	2.75273e-05
		2562	2.76258e-05
		2563.75	2.7721e-05
		2565.5	2.78126e-05
		2567.25	2.79005e-05
		2569	2.79847e-05
		2570.75	2.80649e-05
		2572.5	2.81412e-05
		2574.25	2.82127e-05
		2576	2.82807e-05
		2577.75	2.83444e-05
		2579.5	2.84037e-05
		2581.25	2.84586e-05
		2583	2.85089e-05
		2584.75	2.85546e-05
		2586.5	2.85956e-05
		2588.25	2.86318e-05
		2590	2.86626e-05
		2591.75	2.86892e-05
		2593.5	2.8711e-05
		2595.25	2.87278e-05
		2597	2.87396e-05
		2598.75	2.87464e-05
		2600.5	2.87482e-05
		2602.25	2.87449e-05
		2604	2.87366e-05
		2605.75	2.87232e-05
		2607.5	2.87048e-05
		2609.25	2.86813e-05
		2611	2.86527e-05
		2612.75	2.86192e-05
		2614.5	2.85806e-05
		2616.25	2.8537e-05
		2618	2.84885e-05
		2619.75	2.84351e-05
		2621.5	2.83768e-05
		2623.25	2.83137e-05
		2625	2.82458e-05
		2626.75	2.81731e-05
		2628.5	2.80959e-05
		2630.25	2.8014e-05
		2632	2.79276e-05
		2633.75	2.78368e-05
		2635.5	2.77416e-05
		2637.25	2.76421e-05
		2639	2.75384e-05
		2640.75	2.74306e-05
		2642.5	2.73188e-05
		2644.25	2.7203e-05
		2646	2.70835e-05
		2647.75	2.69589e-05
		2649.5	2.68314e-05
		2651.25	2.67011e-05
		2653	2.65674e-05
		2654.75	2.64304e-05
		2656.5	2.62902e-05
		2658.25	2.61469e-05
		2660	2.60007e-05
		2661.75	2.58517e-05
		2663.5	2.57e-05
		2665.25	2.55456e-05
		2667	2.53889e-05
		2668.75	2.52297e-05
		2670.5	2.50684e-05
		2672.25	2.4905e-05
		2674	2.47397e-05
		2675.75	2.45725e-05
		2677.5	2.44036e-05
		2679.25	2.42332e-05
		2681	2.40606e-05
		2682.75	2.38874e-05
		2684.5	2.37131e-05
		2686.25	2.35376e-05
		2688	2.33612e-05
		2689.75	2.3184e-05
		2691.5	2.3006e-05
		2693.25	2.28275e-05
		2695	2.26485e-05
		2696.75	2.24692e-05
		2698.5	2.22896e-05
		2700.25	2.21098e-05
		2702	2.193e-05
		2703.75	2.17504e-05
		2705.5	2.15709e-05
		2707.25	2.13916e-05
		2709	2.12128e-05
		2710.75	2.10344e-05
		2712.5	2.08566e-05
		2714.25	2.06795e-05
		2716	2.05031e-05
		2717.75	2.03275e-05
		2719.5	2.01528e-05
		2721.25	1.99791e-05
		2723	1.98064e-05
		2724.75	1.96348e-05
		2726.5	1.94644e-05
		2728.25	1.92951e-05
		2730	1.91272e-05
		2731.75	1.89606e-05
		2733.5	1.87953e-05
		2735.25	1.86314e-05
		2737	1.8469e-05
		2738.75	1.8308e-05
		2740.5	1.81485e-05
		2742.25	1.79905e-05
		2744	1.7834e-05
		2745.75	1.76791e-05
		2747.5	1.75257e-05
		2749.25	1.73738e-05
		2751	1.72235e-05
		2752.75	1.70748e-05
		2754.5	1.69275e-05
		2756.25	1.67818e-05
		2758	1.66375e-05
		2759.75	1.64941e-05
		2761.5	1.63528e-05
		2763.25	1.62129e-05
		2765	1.60744e-05
		2766.75	1.59372e-05
		2768.5	1.58014e-05
		2770.25	1.56667e-05
		2772	1.55333e-05
		2773.75	1.5401e-05
		2775.5	1.52692e-05
		2777.25	1.51391e-05
		2779	1.501e-05
		2780.75	1.48818e-05
		2782.5	1.47545e-05
		2784.25	1.4628e-05
		2786	1.45016e-05
		2787.75	1.43766e-05
		2789.5	1.42521e-05
		2791.25	1.41282e-05
		2793	1.40048e-05
		2794.75	1.38818e-05
		2796.5	1.37591e-05
		2798.25	1.36367e-05
		2800	1.35145e-05
		2801.75	1.33925e-05
		2803.5	1.32706e-05
		2805.25	1.31487e-05
		2807	1.30267e-05
		2808.75	1.29047e-05
		2810.5	1.27825e-05
		2812.25	1.26601e-05
		2814	1.25375e-05
		2815.75	1.24146e-05
		2817.5	1.22913e-05
		2819.25	1.21677e-05
		2821	1.20436e-05
		2822.75	1.19184e-05
		2824.5	1.17935e-05
		2826.25	1.1668e-05
		2828	1.15419e-05
		2829.75	1.14153e-05
		2831.5	1.12875e-05
		2833.25	1.11598e-05
		2835	1.10315e-05
		2836.75	1.09025e-05
		2838.5	1.0773e-05
		2840.25	1.06428e-05
		2842	1.0512e-05
		2843.75	1.03807e-05
		2845.5	1.02487e-05
		2847.25	1.01162e-05
		2849	9.98314e-06
		2850.75	9.84957e-06
		2852.5	9.71551e-06
		2854.25	9.581e-06
		2856	9.44607e-06
		2857.75	9.31076e-06
		2859.5	9.17512e-06
		2861.25	9.03917e-06
		2863	8.90298e-06
		2864.75	8.76659e-06
		2866.5	8.63005e-06
		2868.25	8.49342e-06
		2870	8.35608e-06
		2871.75	8.2195e-06
		2873.5	8.08298e-06
		2875.25	7.9466e-06
		2877	7.81041e-06
		2878.75	7.67448e-06
		2880.5	7.53887e-06
		2882.25	7.40364e-06
		2884	7.26887e-06
		2885.75	7.1346e-06
		2887.5	7.00091e-06
		2889.25	6.86786e-06
		2891	6.73551e-06
		2892.75	6.60393e-06
		2894.5	6.47317e-06
		2896.25	6.3433e-06
		2898	6.21438e-06
		2899.75	6.08646e-06
		2901.5	5.95961e-06
		2903.25	5.83387e-06
		2905	5.70868e-06
		2906.75	5.5854e-06
		2908.5	5.46339e-06
		2910.25	5.34269e-06
		2912	5.22335e-06
		2913.75	5.10541e-06
		2915.5	4.98893e-06
		2917.25	4.87392e-06
		2919	4.76044e-06
		2920.75	4.64852e-06
		2922.5	4.53819e-06
		2924.25	4.42947e-06
		2926	4.3224e-06
		2927.75	4.217e-06
		2929.5	4.11329e-06
		2931.25	4.01129e-06
		2933	3.91036e-06
		2934.75	3.81189e-06
		2936.5	3.71517e-06
		2938.25	3.62021e-06
		2940	3.52702e-06
		2941.75	3.4356e-06
		2943.5	3.34595e-06
		2945.25	3.25807e-06
		2947	3.17134e-06
		2948.75	3.08705e-06
		2950.5	3.00452e-06
		2952.25	2.92375e-06
		2954	2.84473e-06
		2955.75	2.76744e-06
		2957.5	2.69188e-06
		2959.25	2.61803e-06
		2961	2.54588e-06
		2962.75	2.4754e-06
		2964.5	2.40659e-06
		2966.25	2.33942e-06
		2968	2.27387e-06
		2969.75	2.20992e-06
		2971.5	2.14754e-06
		2973.25	2.08673e-06
		2975	2.02744e-06
		2976.75	1.96966e-06
		2978.5	1.91336e-06
		2980.25	1.85852e-06
		2982	1.80511e-06
		2983.75	1.75247e-06
		2985.5	1.70188e-06
		2987.25	1.65264e-06
		2989	1.60471e-06
		2990.75	1.55807e-06
		2992.5	1.5127e-06
		2994.25	1.46856e-06
		2996	1.42562e-06
		2997.75	1.38387e-06
		2999.5	1.34327e-06
		3001.25	1.30316e-06
		3003	1.26485e-06
		3004.75	1.2276e-06
		3006.5	1.19139e-06
		3008.25	1.1562e-06
		3010	1.12199e-06
		3011.75	1.08875e-06
		3013.5	1.05645e-06
		3015.25	1.02506e-06
		3017	9.94564e-07
		3018.75	9.64933e-07
		3020.5	9.36145e-07
		3022.25	9.08179e-07
		3024	8.81012e-07
		3025.75	8.54621e-07
		3027.5	8.28986e-07
		3029.25	8.03438e-07
		3031	7.79291e-07
		3032.75	7.55837e-07
		3034.5	7.33056e-07
		3036.25	7.10928e-07
		3038	6.89437e-07
		3039.75	6.68564e-07
		3041.5	6.48291e-07
		3043.25	6.28602e-07
		3045	6.09479e-07
		3046.75	5.90908e-07
		3048.5	5.72873e-07
		3050.25	5.55357e-07
		3052	5.38348e-07
		3053.75	5.21829e-07
		3055.5	5.05788e-07
		3057.25	4.90211e-07
		3059	4.75085e-07
		3060.75	4.59734e-07
		3062.5	4.45512e-07
		3064.25	4.31702e-07
		3066	4.18292e-07
		3067.75	4.05271e-07
		3069.5	3.92627e-07
		3071.25	3.8035e-07
		3073	3.68431e-07
		3074.75	3.56859e-07
		3076.5	3.45624e-07
		3078.25	3.34717e-07
		3080	3.2413e-07
		3081.75	3.13852e-07
		3083.5	3.03877e-07
		3085.25	2.94195e-07
		3087	2.84798e-07
		3088.75	2.75678e-07
		3090.5	2.66828e-07
		3092.25	2.58241e-07
		3094	2.49908e-07
		3095.75	2.41824e-07
		3097.5	2.33981e-07
		3099.25	2.26373e-07
		3101	2.18993e-07
		3102.75	2.11834e-07
		3104.5	2.04892e-07
		3106.25	1.98159e-07
		3108	1.9163e-07
		3109.75	1.853e-07
		3111.5	1.79162e-07
		3113.25	1.73212e-07
		3115	1.67444e-07
		3116.75	1.61243e-07
		3118.5	1.55886e-07
		3120.25	1.5069e-07
		3122	1.45652e-07
		3123.75	1.40768e-07
		3125.5	1.36033e-07
		3127.25	1.31443e-07
		3129	1.26995e-07
		3130.75	1.22685e-07
		3132.5	1.18508e-07
		3134.25	1.14462e-07
		3136	1.10543e-07
		3137.75	1.06748e-07
		3139.5	1.03072e-07
		3141.25	9.95132e-08
		3143	9.60676e-08
		3144.75	9.27322e-08
		3146.5	8.95038e-08
		3148.25	8.63794e-08
		3150	8.33561e-08
		3151.75	8.04308e-08
		3153.5	7.76009e-08
		3155.25	7.48634e-08
		3157	7.22157e-08
		3158.75	6.96552e-08
		3160.5	6.71792e-08
		3162.25	6.47853e-08
		3164	6.2471e-08
		3165.75	6.02338e-08
		3167.5	5.80716e-08
		3169.25	5.59819e-08
		3171	5.39626e-08
		3172.75	5.20115e-08
		3174.5	5.01266e-08
		3176.25	4.83057e-08
		3178	4.65469e-08
		3179.75	4.48482e-08
		3181.5	4.32079e-08
		3183.25	4.16239e-08
		3185	4.00946e-08
		3186.75	3.86182e-08
		3188.5	3.7193e-08
		3190.25	3.58174e-08
		3192	3.44898e-08
		3193.75	3.32086e-08
		3195.5	3.19724e-08
		3197.25	3.07797e-08
		3199	2.9629e-08
		3200.75	2.8519e-08
		3202.5	2.74483e-08
		3204.25	2.64157e-08
		3206	2.54199e-08
		3207.75	2.44597e-08
		3209.5	2.35338e-08
		3211.25	2.26412e-08
		3213	2.17807e-08
		3214.75	2.09512e-08
		3216.5	2.01518e-08
		3218.25	1.93813e-08
		3220	1.86388e-08
		3221.75	1.79233e-08
		3223.5	1.72339e-08
		3225.25	1.65698e-08
		3227	1.593e-08
		3228.75	1.53137e-08
		3230.5	1.47201e-08
		3232.25	1.41484e-08
		3234	1.35979e-08
		3235.75	1.30677e-08
		3237.5	1.25573e-08
		3239.25	1.20659e-08
		3241	1.15928e-08
		3242.75	1.11374e-08
		3244.5	1.0699e-08
		3246.25	9.61279e-09
		3248	9.24635e-09
		3249.75	8.89299e-09
		3251.5	8.55229e-09
		3253.25	8.22383e-09
		3255	7.9072e-09
		3256.75	7.60201e-09
		3258.5	7.30787e-09
		3260.25	7.02442e-09
		3262	6.7513e-09
		3263.75	6.48816e-09
		3265.5	6.23466e-09
		3267.25	5.99047e-09
		3269	5.09275e-09
		3270.75	4.90064e-09
		3272.5	4.71524e-09
		3274.25	4.53634e-09
		3276	4.36373e-09
		3277.75	4.19721e-09
		3279.5	4.03659e-09
		3281.25	3.88167e-09
		3283	3.73227e-09
		3284.75	3.58822e-09
		3286.5	3.44933e-09
		3288.25	3.31544e-09
		3290	3.18639e-09
		3291.75	3.06201e-09
		3293.5	2.94216e-09
		3295.25	2.82667e-09
		3297	2.71541e-09
		3298.75	2.60823e-09
		3300.5	2.505e-09
		3302.25	2.40557e-09
		3304	2.30984e-09
		3305.75	2.21766e-09
		3307.5	2.12892e-09
		3309.25	2.04349e-09
		3311	1.96127e-09
		3312.75	1.88215e-09
		3314.5	1.80601e-09
		3316.25	1.73276e-09
		3318	1.66229e-09
		3319.75	1.5945e-09
		3321.5	1.52931e-09
		3323.25	1.46661e-09
		3325	1.40632e-09
		3326.75	7.05268e-10
		3328.5	6.766e-10
		3330.25	0
		3332	0
		3333.75	0
		3335.5	0
		3337.25	0
		3339	0
		3340.75	0
		3342.5	0
		3344.25	0
		3346	0
		3347.75	0
		3349.5	0
		3351.25	0
		3353	0
		3354.75	0
		3356.5	0
		3358.25	0
		3360	0
		3361.75	0
		3363.5	0
		3365.25	0
		3367	0
		3368.75	0
		3370.5	0
		3372.25	0
		3374	0
		3375.75	0
		3377.5	0
		3379.25	0
		3381	0
		3382.75	0
		3384.5	0
		3386.25	0
		3388	0
		3389.75	0
		3391.5	0
		3393.25	0
		3395	0
		3396.75	0
		3398.5	0
		3400.25	0
		3402	0
		3403.75	0
		3405.5	0
		3407.25	0
		3409	0
		3410.75	0
		3412.5	0
		3414.25	0
		3416	0
		3417.75	0
		3419.5	0
		3421.25	0
		3423	0
		3424.75	0
		3426.5	0
		3428.25	0
		3430	0
		3431.75	0
		3433.5	0
		3435.25	0
		3437	0
		3438.75	0
		3440.5	0
		3442.25	0
		3444	0
		3445.75	0
		3447.5	0
		3449.25	0
		3451	0
		3452.75	0
		3454.5	0
		3456.25	0
		3458	0
		3459.75	0
		3461.5	0
		3463.25	0
		3465	0
		3466.75	0
		3468.5	0
		3470.25	0
		3472	0
		3473.75	0
		3475.5	0
		3477.25	0
		3479	0
		3480.75	0
		3482.5	0
		3484.25	0
		3486	0
		3487.75	0
		3489.5	0
		3491.25	0
		3493	0
		3494.75	0
		3496.5	0
		3498.25	0
[truncated: 1 more rows]

## Sheet: PlotDat4
Source sheet	ZirconData	0	0	90	0	0	0
Plot name	ProbDens4	0.15	0	97.5	0	299.85	0
Plot Type	16	0.3	0	97.5	5
1st free col	9	0.45	0	90	5
Sigma Level	2	0.6	0	90	0
Absolute Errs	TRUE	0.75	0	ErrBox	ErrBox
Symbol Type	1	0.9	0	97.5	0
Inverse Plot	FALSE	1.05	0	105	0
Color Plot	TRUE	1.2	0	105	228
3D plot	FALSE	1.35	0	97.5	228
Linear	FALSE	1.5	0	97.5	0
Data Range	AA2:AB1336	1.65	0	ErrBox	ErrBox
Filled Symbols	FALSE	1.8	0	105	0
ConcAge	FALSE	1.95	0	112.5	0
ConcSwap	FALSE	2.1	0	112.5	45
1st Symbol-row	1	2.25	0	105	45
		2.4	0	105	0
		2.55	0	ErrBox	ErrBox
		2.7	0	112.5	0
		2.85	0	120	0
		3	0	120	10
		3.15	0	112.5	10
		3.3	0	112.5	0
		3.45	0	ErrBox	ErrBox
		3.6	0	120	0
		3.75	0	127.5	0
		3.9	0	127.5	30
		4.05	0	120	30
		4.2	0	120	0
		4.35	0	ErrBox	ErrBox
		4.5	0	127.5	0
		4.65	0	135	0
		4.8	0	135	12
		4.95	0	127.5	12
		5.1	0	127.5	0
		5.25	0	ErrBox	ErrBox
		5.4	0	135	0
		5.55	0	142.5	0
		5.7	0	142.5	11
		5.85	0	135	11
		6	0	135	0
		6.15	0	ErrBox	ErrBox
		6.3	0	142.5	0
		6.45	0	150	0
		6.6	0	150	67
		6.75	0	142.5	67
		6.9	0	142.5	0
		7.05	0	ErrBox	ErrBox
		7.2	0	150	0
		7.35	0	157.5	0
		7.5	0	157.5	109
		7.65	0	150	109
		7.8	0	150	0
		7.95	0	ErrBox	ErrBox
		8.1	0	157.5	0
		8.25	0	165	0
		8.4	0	165	115
		8.55	0	157.5	115
		8.7	0	157.5	0
		8.85	0	ErrBox	ErrBox
		9	0	165	0
		9.15	0	172.5	0
		9.3	0	172.5	125
		9.45	0	165	125
		9.6	0	165	0
		9.75	0	ErrBox	ErrBox
		9.9	0	172.5	0
		10.05	0	180	0
		10.2	0	180	44
		10.35	0	172.5	44
		10.5	0	172.5	0
		10.65	0	ErrBox	ErrBox
		10.8	0	180	0
		10.95	0	187.5	0
		11.1	0	187.5	23
		11.25	0	180	23
		11.4	0	180	0
		11.55	0	ErrBox	ErrBox
		11.7	0	187.5	0
		11.85	0	195	0
		12	0	195	12
		12.15	0	187.5	12
		12.3	0	187.5	0
		12.45	0	ErrBox	ErrBox
		12.6	0	195	0
		12.75	0	202.5	0
		12.9	0	202.5	33
		13.05	0	195	33
		13.2	0	195	0
		13.35	0	ErrBox	ErrBox
		13.5	0	202.5	0
		13.65	0	210	0
		13.8	0	210	122
		13.95	0	202.5	122
		14.1	0	202.5	0
		14.25	0	ErrBox	ErrBox
		14.4	0	210	0
		14.55	0	217.5	0
		14.7	0	217.5	170
		14.85	0	210	170
		15	0	210	0
		15.15	0	ErrBox	ErrBox
		15.3	0	217.5	0
		15.45	0	225	0
		15.6	0	225	72
		15.75	0	217.5	72
		15.9	0	217.5	0
		16.05	0	ErrBox	ErrBox
		16.2	0	225	0
		16.35	0	232.5	0
		16.5	0	232.5	29
		16.65	0	225	29
		16.8	0	225	0
		16.95	0	ErrBox	ErrBox
		17.1	0	232.5	0
		17.25	0	240	0
		17.4	0	240	24
		17.55	0	232.5	24
		17.7	0	232.5	0
		17.85	0	ErrBox	ErrBox
		18	0	240	0
		18.15	0	247.5	0
		18.3	0	247.5	11
		18.45	0	240	11
		18.6	0	240	0
		18.75	0	ErrBox	ErrBox
		18.9	0	247.5	0
		19.05	0	255	0
		19.2	0	255	14
		19.35	0	247.5	14
		19.5	0	247.5	0
		19.65	0	ErrBox	ErrBox
		19.8	0	255	0
		19.95	0	262.5	0
		20.1	0	262.5	17
		20.25	0	255	17
		20.4	0	255	0
		20.55	0	ErrBox	ErrBox
		20.7	0	262.5	0
		20.85	0	270	0
		21	0	270	2
		21.15	0	262.5	2
		21.3	0	262.5	0
		21.45	0	ErrBox	ErrBox
		21.6	0	270	0
		21.75	0	277.5	0
		21.9	0	277.5	3
		22.05	0	270	3
		22.2	0	270	0
		22.35	0	ErrBox	ErrBox
		22.5	0	277.5	0
		22.65	0	285	0
		22.8	0	285	2
		22.95	0	277.5	2
		23.1	0	277.5	0
		23.25	0	ErrBox	ErrBox
		23.4	0
		23.55	0
		23.7	0
		23.85	0
		24	0
		24.15	0
		24.3	0
		24.45	0
		24.6	0
		24.75	0
		24.9	0
		25.05	0
		25.2	0
		25.35	0
		25.5	0
		25.65	0
		25.8	0
		25.95	0
		26.1	0
		26.25	0
		26.4	0
		26.55	0
		26.7	0
		26.85	0
		27	0
		27.15	0
		27.3	0
		27.45	0
		27.6	0
		27.75	0
		27.9	0
		28.05	0
		28.2	0
		28.35	0
		28.5	0
		28.65	0
		28.8	0
		28.95	0
		29.1	0
		29.25	0
		29.4	0
		29.55	0
		29.7	0
		29.85	0
		30	0
		30.15	0
		30.3	0
		30.45	0
		30.6	0
		30.75	0
		30.9	0
		31.05	0
		31.2	0
		31.35	0
		31.5	0
		31.65	0
		31.8	0
		31.95	0
		32.1	0
		32.25	0
		32.4	0
		32.55	0
		32.7	0
		32.85	0
		33	0
		33.15	0
		33.3	0
		33.45	0
		33.6	0
		33.75	0
		33.9	0
		34.05	0
		34.2	0
		34.35	0
		34.5	0
		34.65	0
		34.8	0
		34.95	0
		35.1	0
		35.25	0
		35.4	0
		35.55	0
		35.7	0
		35.85	0
		36	0
		36.15	0
		36.3	0
		36.45	0
		36.6	0
		36.75	0
		36.9	0
		37.05	0
		37.2	0
		37.35	0
		37.5	0
		37.65	0
		37.8	0
		37.95	0
		38.1	0
		38.25	0
		38.4	0
		38.55	0
		38.7	0
		38.85	0
		39	0
		39.15	0
		39.3	0
		39.45	0
		39.6	0
		39.75	0
		39.9	0
		40.05	0
		40.2	0
		40.35	0
		40.5	0
		40.65	0
		40.8	0
		40.95	0
		41.1	0
		41.25	0
		41.4	0
		41.55	0
		41.7	0
		41.85	0
		42	0
		42.15	0
		42.3	0
		42.45	0
		42.6	0
		42.75	0
		42.9	0
		43.05	0
		43.2	0
		43.35	0
		43.5	0
		43.65	0
		43.8	0
		43.95	0
		44.1	0
		44.25	0
		44.4	0
		44.55	0
		44.7	0
		44.85	0
		45	0
		45.15	0
		45.3	0
		45.45	0
		45.6	0
		45.75	0
		45.9	0
		46.05	0
		46.2	0
		46.35	0
		46.5	0
		46.65	0
		46.8	0
		46.95	0
		47.1	0
		47.25	0
		47.4	0
		47.55	0
		47.7	0
		47.85	0
		48	0
		48.15	0
		48.3	0
		48.45	0
		48.6	0
		48.75	0
		48.9	0
		49.05	0
		49.2	0
		49.35	0
		49.5	0
		49.65	0
		49.8	0
		49.95	0
		50.1	0
		50.25	0
		50.4	0
		50.55	0
		50.7	0
		50.85	0
		51	0
		51.15	0
		51.3	0
		51.45	0
		51.6	0
		51.75	0
		51.9	0
		52.05	0
		52.2	0
		52.35	0
		52.5	0
		52.65	0
		52.8	0
		52.95	0
		53.1	0
		53.25	0
		53.4	0
		53.55	0
		53.7	0
		53.85	0
		54	0
		54.15	0
		54.3	0
		54.45	0
		54.6	0
		54.75	0
		54.9	0
		55.05	0
		55.2	0
		55.35	0
		55.5	0
		55.65	0
		55.8	0
		55.95	0
		56.1	0
		56.25	0
		56.4	0
		56.55	0
		56.7	0
		56.85	0
		57	0
		57.15	0
		57.3	0
		57.45	0
		57.6	0
		57.75	0
		57.9	0
		58.05	0
		58.2	0
		58.35	0
		58.5	0
		58.65	0
		58.8	0
		58.95	0
		59.1	0
		59.25	0
		59.4	0
		59.55	0
		59.7	0
		59.85	0
		60	0
		60.15	0
		60.3	0
		60.45	0
		60.6	0
		60.75	0
		60.9	0
		61.05	0
		61.2	0
		61.35	0
		61.5	0
		61.65	0
		61.8	0
		61.95	0
		62.1	0
		62.25	0
		62.4	0
		62.55	0
		62.7	0
		62.85	0
		63	0
		63.15	0
		63.3	0
		63.45	0
		63.6	0
		63.75	0
		63.9	0
		64.05	0
		64.2	0
		64.35	0
		64.5	0
		64.65	0
		64.8	0
		64.95	0
		65.1	0
		65.25	0
		65.4	0
		65.55	0
		65.7	0
		65.85	0
		66	0
		66.15	0
		66.3	0
		66.45	0
		66.6	0
		66.75	0
		66.9	0
		67.05	0
		67.2	0
		67.35	0
		67.5	0
		67.65	0
		67.8	0
		67.95	0
		68.1	0
		68.25	0
		68.4	0
		68.55	0
		68.7	0
		68.85	0
		69	0
		69.15	0
		69.3	0
		69.45	0
		69.6	0
		69.75	0
		69.9	0
		70.05	0
		70.2	0
		70.35	0
		70.5	0
		70.65	0
		70.8	0
		70.95	0
		71.1	0
		71.25	0
		71.4	0
		71.55	0
		71.7	0
		71.85	0
		72	0
		72.15	0
		72.3	0
		72.45	0
		72.6	0
		72.75	0
		72.9	0
		73.05	0
		73.2	0
		73.35	0
		73.5	0
		73.65	0
		73.8	0
		73.95	0
		74.1	0
		74.25	0
		74.4	0
		74.55	0
		74.7	0
		74.85	0
		75	0
		75.15	0
		75.3	0
		75.45	0
		75.6	0
		75.75	0
		75.9	0
		76.05	0
		76.2	0
		76.35	0
		76.5	0
		76.65	0
		76.8	0
		76.95	0
		77.1	0
		77.25	0
		77.4	0
		77.55	0
		77.7	0
		77.85	0
		78	0
		78.15	0
		78.3	0
		78.45	0
		78.6	0
		78.75	0
		78.9	0
		79.05	0
		79.2	0
		79.35	0
		79.5	0
		79.65	0
		79.8	0
		79.95	0
		80.1	0
		80.25	0
		80.4	0
		80.55	0
		80.7	0
		80.85	0
		81	0
		81.15	0
		81.3	0
		81.45	0
		81.6	0
		81.75	0
		81.9	0
		82.05	0
		82.2	0
		82.35	0
		82.5	0
		82.65	0
		82.8	1.01516e-09
		82.95	1.56966e-09
		83.1	2.40769e-09
		83.25	3.66366e-09
		83.4	5.53036e-09
		83.55	8.28156e-09
		83.7	1.23025e-08
		83.85	1.81299e-08
		84	2.65045e-08
		84.15	3.84384e-08
		84.3	5.53009e-08
		84.45	7.89261e-08
		84.6	1.11746e-07
		84.75	1.56951e-07
		84.9	2.18684e-07
		85.05	3.02268e-07
		85.2	4.14466e-07
		85.35	5.63777e-07
		85.5	7.60759e-07
		85.65	1.01838e-06
		85.8	1.35236e-06
		85.95	1.78155e-06
		86.1	2.32822e-06
		86.25	3.01836e-06
		86.4	3.88187e-06
		86.55	4.95259e-06
		86.7	6.26824e-06
		86.85	7.8701e-06
		87	9.80249e-06
		87.15	1.2112e-05
		87.3	1.48461e-05
		87.45	1.80524e-05
		87.6	2.1776e-05
		87.75	2.6059e-05
		87.9	3.09349e-05
		88.05	3.64303e-05
		88.2	4.25598e-05
		88.35	4.93244e-05
		88.5	5.67085e-05
		88.65	6.46787e-05
		88.8	7.31814e-05
		88.95	8.21429e-05
		89.1	9.14682e-05
		89.25	0.000101043
		89.4	0.000110735
		89.55	0.000120394
		89.7	0.000129859
		89.85	0.000138965
		90	0.000147538
		90.15	0.000155415
		90.3	0.000162437
		90.45	0.000168467
		90.6	0.000173386
		90.75	0.000177103
		90.9	0.000179561
		91.05	0.00018074
		91.2	0.000180657
		91.35	0.000179369
		91.5	0.000176983
		91.65	0.000173626
		91.8	0.000169479
		91.95	0.000164753
		92.1	0.000159687
		92.25	0.000154551
		92.4	0.000149639
		92.55	0.000145264
		92.7	0.000141754
		92.85	0.000139466
		93	0.000138765
		93.15	0.000140043
		93.3	0.000143717
		93.45	0.000150237
		93.6	0.000160087
		93.75	0.000173804
		93.9	0.000191985
		94.05	0.000215285
		94.2	0.000244444
		94.35	0.00028029
		94.5	0.00032374
		94.65	0.000375814
		94.8	0.000437645
		94.95	0.000510471
		95.1	0.000595649
		95.25	0.000694665
		95.4	0.000809142
		95.55	0.000940841
		95.7	0.00109169
		95.85	0.0012638
		96	0.00145945
		96.15	0.0016811
		96.3	0.00193135
		96.45	0.00221285
		96.6	0.00252821
		96.75	0.00287984
		96.9	0.00326977
		97.05	0.00369951
		97.2	0.00416989
		97.35	0.00468105
		97.5	0.00523246
		97.65	0.0058231
		97.8	0.0064517
		97.95	0.007117
		98.1	0.00781801
		98.25	0.00855416
		98.4	0.00932529
		98.55	0.0101315
		98.7	0.010973
		98.85	0.0118494
		99	0.0127599
		99.15	0.0137028
		99.3	0.0146755
		99.45	0.0156744
		99.6	0.0166955
		99.75	0.0177344
		99.9	0.0187867
		100.05	0.0198479
		100.2	0.0209132
		100.35	0.0219779
		100.5	0.0230358
		100.65	0.0240801
		100.8	0.0251019
		100.95	0.0260906
		101.1	0.0270335
		101.25	0.0279164
		101.4	0.0287235
		101.55	0.0294384
		101.7	0.0300443
		101.85	0.0305256
		102	0.0308681
		102.15	0.0310603
		102.3	0.0310945
		102.45	0.0309676
		102.6	0.0306817
		102.75	0.0302445
		102.9	0.0296687
		103.05	0.0289711
		103.2	0.0281717
		103.35	0.0272914
		103.5	0.0263507
		103.65	0.0253681
		103.8	0.0243592
		103.95	0.0233359
		104.1	0.0223073
		104.25	0.0212797
		104.4	0.0202575
		104.55	0.0192444
		104.7	0.0182442
		104.85	0.017261
		105	0.0162995
		105.15	0.0153649
		105.3	0.0144626
		105.45	0.0135979
		105.6	0.0127749
		105.75	0.0119967
		105.9	0.0112652
		106.05	0.0105805
		106.2	0.00994162
		106.35	0.00934643
		106.5	0.00879235
		106.65	0.00827669
		106.8	0.00779705
		106.95	0.00735166
		107.1	0.00693955
		107.25	0.00656056
		107.4	0.00621514
		107.55	0.00590411
		107.7	0.00562821
		107.85	0.00538771
		108	0.00518204
		108.15	0.00500949
		108.3	0.00486704
		108.45	0.00475043
		108.6	0.0046543
		108.75	0.00457251
		108.9	0.00449861
		109.05	0.00442627
		109.2	0.00434982
		109.35	0.00426462
		109.5	0.00416738
		109.65	0.00405628
		109.8	0.003931
		109.95	0.00379252
		110.1	0.00364292
		110.25	0.00348499
		110.4	0.00332192
		110.55	0.00315693
		110.7	0.00299304
		110.85	0.00283282
		111	0.00267832
		111.15	0.002531
		111.3	0.00239176
		111.45	0.002261
		111.6	0.00213872
		111.75	0.0020246
		111.9	0.00191811
		112.05	0.00181859
		112.2	0.00172532
		112.35	0.0016376
		112.5	0.00155483
		112.65	0.00147647
		112.8	0.00140219
		112.95	0.00133178
		113.1	0.00126522
		113.25	0.00120267
		113.4	0.00114439
		113.55	0.00109078
		113.7	0.00104227
		113.85	0.000999315
		114	0.000962304
		114.15	0.000931549
		114.3	0.000907225
		114.45	0.000889341
		114.6	0.000877729
		114.75	0.000872044
		114.9	0.000871769
		115.05	0.000876239
		115.2	0.000884675
		115.35	0.00089622
		115.5	0.000909977
		115.65	0.000925057
		115.8	0.000940614
		115.95	0.000955883
		116.1	0.000970213
		116.25	0.000983093
		116.4	0.000994165
		116.55	0.00100324
		116.7	0.00101032
		116.85	0.00101557
		117	0.00101934
		117.15	0.00102211
		117.3	0.00102455
		117.45	0.0010274
		117.6	0.00103153
		117.75	0.00103786
		117.9	0.00104733
		118.05	0.00106091
		118.2	0.00107949
		118.35	0.00110394
		118.5	0.00113502
		118.65	0.00117337
		118.8	0.00121954
		118.95	0.0012739
		119.1	0.00133671
		119.25	0.00140807
		119.4	0.00148792
		119.55	0.00157609
		119.7	0.00167224
		119.85	0.00177593
		120	0.00188655
		120.15	0.00200339
		120.3	0.00212562
		120.45	0.00225228
		120.6	0.00238229
		120.75	0.0025145
		120.9	0.00264764
		121.05	0.00278035
		121.2	0.00291123
		121.35	0.00303883
		121.5	0.00316168
		121.65	0.00327833
		121.8	0.00338738
		121.95	0.00348749
		122.1	0.00357746
		122.25	0.00365623
		122.4	0.00372289
		122.55	0.00377676
		122.7	0.00381736
		122.85	0.00384447
		123	0.00385809
		123.15	0.00385845
		123.3	0.00384603
		123.45	0.0038215
		123.6	0.00378572
		123.75	0.00373972
		123.9	0.00368463
		124.05	0.00362168
		124.2	0.00355214
		124.35	0.0034773
		124.5	0.00339844
		124.65	0.00331675
		124.8	0.00323339
		124.95	0.00314938
		125.1	0.00306565
		125.25	0.00298301
		125.4	0.00290212
		125.55	0.00282352
		125.7	0.00274763
		125.85	0.00267474
		126	0.00260506
		126.15	0.00253867
		126.3	0.00247558
		126.45	0.00241573
		126.6	0.00235901
		126.75	0.00230523
		126.9	0.0022542
		127.05	0.00220567
		127.2	0.0021594
		127.35	0.0021151
		127.5	0.00207252
		127.65	0.00203137
		127.8	0.00199138
		127.95	0.0019523
		128.1	0.00191389
		128.25	0.00187593
		128.4	0.00183821
		128.55	0.00180056
		128.7	0.00176283
		128.85	0.0017249
		129	0.00168668
		129.15	0.00164811
		129.3	0.00160916
		129.45	0.00156981
		129.6	0.00153008
		129.75	0.00148999
		129.9	0.0014496
		130.05	0.00140898
		130.2	0.00136819
		130.35	0.00132731
		130.5	0.00128642
		130.65	0.00124562
		130.8	0.00120498
		130.95	0.00116459
		131.1	0.00112453
		131.25	0.00108489
		131.4	0.00104576
		131.55	0.0010072
		131.7	0.000969324
		131.85	0.000932206
		132	0.000895944
		132.15	0.000860636
		132.3	0.000826387
		132.45	0.000793314
		132.6	0.000761536
		132.75	0.00073118
		132.9	0.00070239
		133.05	0.000675309
		133.2	0.000650093
		133.35	0.000626909
		133.5	0.000605935
		133.65	0.000587352
		133.8	0.000571361
		133.95	0.000558164
		134.1	0.000547976
		134.25	0.000541014
		134.4	0.000537495
		134.55	0.000537628
		134.7	0.000541607
		134.85	0.000549599
		135	0.000561727
		135.15	0.000578062
		135.3	0.000598603
		135.45	0.000623255
		135.6	0.000651832
		135.75	0.000684031
		135.9	0.000719435
		136.05	0.000757508
		136.2	0.000797606
		136.35	0.000838986
		136.5	0.000880834
		136.65	0.000922288
		136.8	0.000962473
		136.95	0.00100054
		137.1	0.0010357
		137.25	0.00106727
		137.4	0.00109469
		137.55	0.00111757
		137.7	0.00113568
		137.85	0.00114898
		138	0.00115761
		138.15	0.00116185
		138.3	0.00116213
		138.45	0.00115899
		138.6	0.00115301
		138.75	0.00114481
		138.9	0.00113499
		139.05	0.00112413
		139.2	0.0011127
		139.35	0.00110112
		139.5	0.00108968
		139.65	0.00107859
		139.8	0.00106795
		139.95	0.00105782
		140.1	0.00104817
		140.25	0.00103895
		140.4	0.0010301
		140.55	0.00102157
		140.7	0.00101336
		140.85	0.00100551
		141	0.000998114
		141.15	0.000991374
		141.3	0.000985551
		141.45	0.000980992
		141.6	0.000978137
		141.75	0.000977494
		141.9	0.000979646
		142.05	0.000985243
		142.2	0.00099499
		142.35	0.00100963
		142.5	0.00102992
		142.65	0.00105667
		142.8	0.00109067
		142.95	0.00113271
		143.1	0.00118356
		143.25	0.00124394
		143.4	0.00131458
		143.55	0.00139611
		143.7	0.00148916
		143.85	0.00159428
		144	0.00171202
		144.15	0.00184286
		144.3	0.00198731
		144.45	0.00214586
		144.6	0.00231903
		144.75	0.00250739
		144.9	0.00271157
		145.05	0.00293228
		145.2	0.00317028
		145.35	0.00342642
		145.5	0.00370159
		145.65	0.00399667
		145.8	0.00431249
		145.95	0.00464977
		146.1	0.005009
		146.25	0.00539039
		146.4	0.00579377
		146.55	0.00621846
		146.7	0.00666327
		146.85	0.0071264
		147	0.00760542
		147.15	0.0080973
		147.3	0.00859842
		147.45	0.0091047
		147.6	0.00961166
		147.75	0.0101146
		147.9	0.0106086
		148.05	0.0110891
		148.2	0.0115514
		148.35	0.0119915
		148.5	0.0124055
		148.65	0.0127904
		148.8	0.0131435
		148.95	0.0134631
		149.1	0.0137478
		149.25	0.0139968
		149.4	0.0142099
		149.55	0.0143875
		149.7	0.0145299
		149.85	0.0146383
		150	0.0147137
		150.15	0.0147576
		150.3	0.0147715
		150.45	0.0147572
		150.6	0.0147166
		150.75	0.0146516
		150.9	0.0145643
		151.05	0.014457
		151.2	0.0143318
		151.35	0.0141909
		151.5	0.0140366
		151.65	0.0138706
		151.8	0.0136951
		151.95	0.0135115
		152.1	0.0133213
		152.25	0.0131257
		152.4	0.0129257
		152.55	0.0127219
		152.7	0.0125151
		152.85	0.0123056
		153	0.0120936
		153.15	0.0118796
		153.3	0.0116636
		153.45	0.011446
		153.6	0.0112269
		153.75	0.0110066
		153.9	0.0107855
		154.05	0.0105639
		154.2	0.0103424
		154.35	0.0101214
		154.5	0.00990159
		154.65	0.00968369
		154.8	0.00946852
		154.95	0.00925704
		155.1	0.00905029
		155.25	0.00884946
		155.4	0.00865583
		155.55	0.00847076
		155.7	0.0082957
		155.85	0.00813209
		156	0.00798137
		156.15	0.00784492
		156.3	0.00772402
		156.45	0.00761979
		156.6	0.00753316
		156.75	0.00746485
		156.9	0.00741532
		157.05	0.00738477
		157.2	0.00737313
		157.35	0.00738009
		157.5	0.00740509
		157.65	0.00744735
		157.8	0.00750594
		157.95	0.00757979
		158.1	0.00766773
		158.25	0.00776858
		158.4	0.00788118
		158.55	0.00800444
		158.7	0.00813738
		158.85	0.00827915
		159	0.00842909
		159.15	0.00858671
		159.3	0.00875168
		159.45	0.00892381
		159.6	0.00910305
		159.75	0.00928941
		159.9	0.00948289
		160.05	0.00968348
		160.2	0.00989104
		160.35	0.0101053
		160.5	0.0103258
		160.65	0.0105519
		160.8	0.0107827
		160.95	0.011017
		161.1	0.0112536
		161.25	0.011491
		161.4	0.0117278
		161.55	0.0119624
		161.7	0.0121934
		161.85	0.0124192
		162	0.0126389
		162.15	0.0128514
		162.3	0.0130559
		162.45	0.0132522
		162.6	0.01344
		162.75	0.0136195
		162.9	0.0137911
		163.05	0.0139552
		163.2	0.0141126
		163.35	0.0142639
		163.5	0.0144097
		163.65	0.0145507
		163.8	0.0146872
		163.95	0.0148194
		164.1	0.0149471
		164.25	0.0150699
		164.4	0.0151871
		164.55	0.0152976
		164.7	0.0154
		164.85	0.0154929
		165	0.0155745
		165.15	0.015643
		165.3	0.0156966
		165.45	0.0157337
		165.6	0.0157525
		165.75	0.015752
		165.9	0.0157308
		166.05	0.0156886
		166.2	0.0156248
		166.35	0.0155395
		166.5	0.0154332
		166.65	0.0153067
		166.8	0.0151611
		166.95	0.0149976
		167.1	0.0148179
		167.25	0.0146238
		167.4	0.014417
		167.55	0.0141994
		167.7	0.0139729
		167.85	0.0137394
		168	0.0135006
		168.15	0.0132583
		168.3	0.013014
		168.45	0.012769
		168.6	0.0125247
		168.75	0.0122821
		168.9	0.0120422
		169.05	0.0118056
		169.2	0.011573
		169.35	0.0113447
		169.5	0.0111211
		169.65	0.010902
		169.8	0.0106876
		169.95	0.0104776
		170.1	0.0102718
		170.25	0.0100697
		170.4	0.00987102
		170.55	0.00967526
		170.7	0.00948199
		170.85	0.00929081
		171	0.00910133
		171.15	0.00891322
		171.3	0.00872624
		171.45	0.00854022
		171.6	0.00835504
		171.75	0.0081707
		171.9	0.00798725
		172.05	0.00780481
		172.2	0.00762358
		172.35	0.00744381
		172.5	0.0072658
		172.65	0.00708989
		172.8	0.00691649
		172.95	0.00674602
		173.1	0.00657892
		173.25	0.00641568
		173.4	0.00625679
		173.55	0.00610275
		173.7	0.00595405
		173.85	0.00581117
		174	0.00567456
		174.15	0.00554464
		174.3	0.00542174
		174.45	0.00530616
		174.6	0.00519809
		174.75	0.00509762
		174.9	0.00500473
		175.05	0.0049193
		175.2	0.00484106
		175.35	0.0047696
		175.5	0.00470443
		175.65	0.0046449
		175.8	0.00459028
		175.95	0.00453978
		176.1	0.00449253
		176.25	0.00444766
		176.4	0.0044043
		176.55	0.00436165
		176.7	0.00431895
		176.85	0.00427558
		177	0.00423103
		177.15	0.00418492
		177.3	0.00413702
		177.45	0.00408726
		177.6	0.00403567
		177.75	0.00398238
		177.9	0.00392765
		178.05	0.00387177
		178.2	0.00381505
		178.35	0.00375784
		178.5	0.00370047
		178.65	0.00364322
		178.8	0.00358635
		178.95	0.00353004
		179.1	0.00347445
		179.25	0.00341967
		179.4	0.00336573
		179.55	0.00331265
		179.7	0.00326039
		179.85	0.00320893
		180	0.0031582
		180.15	0.00310815
		180.3	0.00305874
		180.45	0.00300991
		180.6	0.00296167
		180.75	0.00291401
		180.9	0.00286694
		181.05	0.00282053
		181.2	0.00277481
		181.35	0.00272988
		181.5	0.00268582
		181.65	0.00264272
		181.8	0.00260068
		181.95	0.0025598
		182.1	0.00252014
		182.25	0.00248179
		182.4	0.00244479
		182.55	0.00240917
		182.7	0.00237493
		182.85	0.00234205
		183	0.00231047
		183.15	0.00228012
		183.3	0.00225089
		183.45	0.00222267
		183.6	0.00219532
		183.75	0.00216867
		183.9	0.00214257
		184.05	0.00211686
		184.2	0.00209139
		184.35	0.00206599
		184.5	0.00204054
		184.65	0.00201491
		184.8	0.00198901
		184.95	0.00196276
		185.1	0.0019361
		185.25	0.00190903
		185.4	0.00188153
		185.55	0.00185363
		185.7	0.00182538
		185.85	0.00179685
		186	0.00176814
		186.15	0.00173935
		186.3	0.00171061
		186.45	0.00168204
		186.6	0.00165378
		186.75	0.00162598
		186.9	0.00159877
		187.05	0.00157231
		187.2	0.00154673
		187.35	0.00152214
		187.5	0.00149867
		187.65	0.00147643
		187.8	0.00145551
		187.95	0.00143597
		188.1	0.00141788
		188.25	0.00140128
		188.4	0.0013862
		188.55	0.00137264
		188.7	0.0013606
		188.85	0.00135004
		189	0.00134094
		189.15	0.00133324
		189.3	0.00132687
		189.45	0.00132176
		189.6	0.00131783
		189.75	0.00131497
		189.9	0.0013131
		190.05	0.0013121
		190.2	0.00131187
		190.35	0.00131229
		190.5	0.00131325
		190.65	0.00131465
		190.8	0.00131636
		190.95	0.0013183
		191.1	0.00132035
		191.25	0.00132245
		191.4	0.00132451
		191.55	0.00132648
		191.7	0.00132832
		191.85	0.00133
		192	0.00133154
		192.15	0.00133296
		192.3	0.00133432
		192.45	0.00133568
		192.6	0.00133718
		192.75	0.00133893
		192.9	0.00134109
		193.05	0.00134385
		193.2	0.0013474
		193.35	0.00135197
		193.5	0.00135778
		193.65	0.00136508
		193.8	0.00137412
		193.95	0.00138514
		194.1	0.0013984
		194.25	0.00141413
		194.4	0.00143258
		194.55	0.00145398
		194.7	0.00147854
		194.85	0.00150647
		195	0.00153796
		195.15	0.00157319
		195.3	0.00161233
		195.45	0.00165553
		195.6	0.00170293
		195.75	0.00175464
		195.9	0.00181077
		196.05	0.00187141
		196.2	0.00193662
		196.35	0.00200644
		196.5	0.00208089
		196.65	0.00215996
		196.8	0.00224361
		196.95	0.00233177
		197.1	0.00242433
		197.25	0.00252116
		197.4	0.00262208
		197.55	0.00272687
		197.7	0.00283531
		197.85	0.00294711
		198	0.00306197
		198.15	0.0031796
		198.3	0.00329964
		198.45	0.00342178
		198.6	0.00354568
		198.75	0.00367101
		198.9	0.00379747
		199.05	0.00392477
		199.2	0.00405266
		199.35	0.00418092
		199.5	0.00430938
		199.65	0.00443789
		199.8	0.00456637
		199.95	0.00469475
		200.1	0.00482305
		200.25	0.00495127
		200.4	0.0050795
		200.55	0.0052078
		200.7	0.00533629
		200.85	0.0054651
		201	0.00559436
		201.15	0.0057242
		201.3	0.00585477
		201.45	0.00598619
		201.6	0.0061186
		201.75	0.00625212
		201.9	0.00638685
		202.05	0.00652292
		202.2	0.00666043
		202.35	0.00679949
		202.5	0.00694025
		202.65	0.00708284
		202.8	0.00722744
		202.95	0.00737424
		203.1	0.00752348
		203.25	0.00767544
		203.4	0.00783042
		203.55	0.00798878
		203.7	0.00815091
		203.85	0.00831723
		204	0.00848819
		204.15	0.00866425
		204.3	0.00884585
		204.45	0.00903346
		204.6	0.00922748
		204.75	0.00942827
		204.9	0.00963615
		205.05	0.0098513
		205.2	0.0100739
		205.35	0.0103038
		205.5	0.010541
		205.65	0.0107852
		205.8	0.0110359
		205.95	0.0112926
		206.1	0.0115546
		206.25	0.0118209
		206.4	0.0120906
		206.55	0.0123626
		206.7	0.0126355
		206.85	0.0129082
		207	0.0131791
		207.15	0.0134469
		207.3	0.0137102
		207.45	0.0139674
		207.6	0.0142172
		207.75	0.0144583
		207.9	0.0146893
		208.05	0.0149092
		208.2	0.0151168
		208.35	0.0153113
		208.5	0.0154919
		208.65	0.0156579
		208.8	0.0158089
		208.95	0.0159446
		209.1	0.0160648
		209.25	0.0161695
		209.4	0.0162589
		209.55	0.0163333
		209.7	0.016393
		209.85	0.0164387
		210	0.0164709
		210.15	0.0164905
		210.3	0.0164982
		210.45	0.0164949
		210.6	0.0164817
		210.75	0.0164596
		210.9	0.0164296
		211.05	0.0163928
		211.2	0.0163502
		211.35	0.0163031
		211.5	0.0162524
		211.65	0.0161992
		211.8	0.0161445
		211.95	0.0160893
		212.1	0.0160344
		212.25	0.0159807
		212.4	0.0159288
		212.55	0.0158794
		212.7	0.0158331
		212.85	0.0157901
		213	0.015751
		213.15	0.0157158
		213.3	0.0156846
		213.45	0.0156573
		213.6	0.0156339
		213.75	0.0156141
		213.9	0.0155974
		214.05	0.0155836
		214.2	0.0155719
		214.35	0.0155619
		214.5	0.0155527
		214.65	0.0155438
		214.8	0.0155342
		214.95	0.0155233
		215.1	0.0155101
		215.25	0.0154937
		215.4	0.0154734
		215.55	0.0154483
		215.7	0.0154174
		215.85	0.0153801
		216	0.0153356
		216.15	0.015283
		216.3	0.0152216
		216.45	0.0151509
		216.6	0.0150703
		216.75	0.0149791
		216.9	0.0148769
		217.05	0.0147634
		217.2	0.0146381
		217.35	0.0145009
		217.5	0.0143516
		217.65	0.0141899
		217.8	0.014016
		217.95	0.0138298
		218.1	0.0136315
		218.25	0.0134213
		218.4	0.0131994
		218.55	0.0129662
		218.7	0.0127222
		218.85	0.0124678
		219	0.0122036
		219.15	0.0119303
		219.3	0.0116486
		219.45	0.0113592
		219.6	0.011063
		219.75	0.0107609
		219.9	0.0104538
		220.05	0.0101427
		220.2	0.00982869
		220.35	0.00951279
		220.5	0.00919608
		220.65	0.00887966
		220.8	0.00856463
		220.95	0.00825208
		221.1	0.00794307
		221.25	0.00763864
		221.4	0.0073398
		221.55	0.00704748
		221.7	0.00676257
		221.85	0.00648589
		222	0.00621816
		222.15	0.00596006
		222.3	0.00571215
		222.45	0.00547491
		222.6	0.00524872
		222.75	0.00503389
		222.9	0.00483062
		223.05	0.00463904
		223.2	0.00445919
		223.35	0.00429106
		223.5	0.00413452
		223.65	0.00398945
		223.8	0.00385561
		223.95	0.00373276
		224.1	0.00362059
		224.25	0.00351878
		224.4	0.00342697
		224.55	0.00334479
		224.7	0.00327185
		224.85	0.00320774
		225	0.00315205
		225.15	0.00310437
		225.3	0.00306426
		225.45	0.00303131
		225.6	0.00300509
		225.75	0.00298517
		225.9	0.00297111
		226.05	0.00296249
		226.2	0.00295886
		226.35	0.00295978
		226.5	0.00296482
		226.65	0.00297354
		226.8	0.00298549
		226.95	0.00300022
		227.1	0.00301732
		227.25	0.00303632
		227.4	0.00305681
		227.55	0.00307837
		227.7	0.00310059
		227.85	0.00312309
		228	0.00314547
		228.15	0.0031674
		228.3	0.00318853
		228.45	0.00320857
		228.6	0.00322722
		228.75	0.00324424
		228.9	0.00325941
		229.05	0.00327254
		229.2	0.00328348
		229.35	0.00329209
		229.5	0.00329828
		229.65	0.00330199
		229.8	0.00330318
		229.95	0.00330184
		230.1	0.00329799
		230.25	0.00329167
		230.4	0.00328293
		230.55	0.00327187
		230.7	0.00325856
		230.85	0.00324311
		231	0.00322564
		231.15	0.00320628
		231.3	0.00318515
		231.45	0.00316238
		231.6	0.00313811
		231.75	0.00311245
		231.9	0.00308555
		232.05	0.00305751
		232.2	0.00302846
		232.35	0.0029985
		232.5	0.00296773
		232.65	0.00293624
		232.8	0.00290412
		232.95	0.00287143
		233.1	0.00283823
		233.25	0.00280458
		233.4	0.00277053
		233.55	0.0027361
		233.7	0.00270134
		233.85	0.00266625
		234	0.00263085
		234.15	0.00259516
		234.3	0.0025592
		234.45	0.00252295
		234.6	0.00248645
		234.75	0.00244968
		234.9	0.00241266
		235.05	0.0023754
		235.2	0.00233792
		235.35	0.00230023
		235.5	0.00226236
		235.65	0.00222434
		235.8	0.0021862
		235.95	0.00214798
		236.1	0.00210973
		236.25	0.00207149
		236.4	0.00203331
		236.55	0.00199526
		236.7	0.00195739
		236.85	0.00191976
		237	0.00188243
		237.15	0.00184548
		237.3	0.00180896
		237.45	0.00177293
		237.6	0.00173746
		237.75	0.0017026
		237.9	0.00166841
		238.05	0.00163495
		238.2	0.00160225
		238.35	0.00157037
		238.5	0.00153934
		238.65	0.00150921
		238.8	0.00148
		238.95	0.00145175
		239.1	0.00142448
		239.25	0.00139821
		239.4	0.00137297
		239.55	0.00134877
		239.7	0.00132563
		239.85	0.00130356
		240	0.00128258
		240.15	0.00126269
		240.3	0.00124389
		240.45	0.0012262
		240.6	0.00120963
		240.75	0.00119416
		240.9	0.00117981
		241.05	0.00116657
		241.2	0.00115444
		241.35	0.00114341
		241.5	0.00113348
		241.65	0.00112464
		241.8	0.00111687
		241.95	0.00111016
		242.1	0.00110448
		242.25	0.00109983
		242.4	0.00109618
		242.55	0.0010935
		242.7	0.00109175
		242.85	0.00109092
		243	0.00109097
		243.15	0.00109186
		243.3	0.00109357
		243.45	0.00109604
		243.6	0.00109925
		243.75	0.00110317
		243.9	0.00110774
		244.05	0.00111295
		244.2	0.00111876
		244.35	0.00112512
		244.5	0.00113203
		244.65	0.00113944
		244.8	0.00114733
		244.95	0.00115568
		245.1	0.00116447
		245.25	0.00117369
		245.4	0.00118332
		245.55	0.00119335
		245.7	0.00120378
		245.85	0.00121459
		246	0.00122579
		246.15	0.00123737
		246.3	0.00124933
		246.45	0.00126168
		246.6	0.00127442
		246.75	0.00128755
		246.9	0.00130107
		247.05	0.00131498
		247.2	0.00132928
		247.35	0.00134397
		247.5	0.00135904
		247.65	0.00137449
		247.8	0.00139031
		247.95	0.00140648
		248.1	0.00142299
		248.25	0.00143981
		248.4	0.00145692
		248.55	0.00147429
		248.7	0.00149189
		248.85	0.00150968
		249	0.00152763
		249.15	0.00154568
		249.3	0.00156379
		249.45	0.00158191
		249.6	0.00159999
		249.75	0.00161798
		249.9	0.00163582
		250.05	0.00165345
		250.2	0.00167081
		250.35	0.00168786
		250.5	0.00170453
		250.65	0.00172076
		250.8	0.00173652
		250.95	0.00175173
		251.1	0.00176637
		251.25	0.00178037
		251.4	0.00179369
		251.55	0.0018063
		251.7	0.00181817
		251.85	0.00182924
		252	0.00183951
		252.15	0.00184893
		252.3	0.00185749
		252.45	0.00186518
		252.6	0.00187196
		252.75	0.00187784
		252.9	0.0018828
		253.05	0.00188683
		253.2	0.00188993
		253.35	0.00189209
		253.5	0.00189331
		253.65	0.00189359
		253.8	0.00189293
		253.95	0.00189133
		254.1	0.00188879
		254.25	0.00188531
		254.4	0.00188089
		254.55	0.00187554
		254.7	0.00186925
		254.85	0.00186203
		255	0.00185388
		255.15	0.0018448
		255.3	0.0018348
		255.45	0.00182387
		255.6	0.00181201
		255.75	0.00179924
		255.9	0.00178556
		256.05	0.00177097
		256.2	0.00175548
		256.35	0.0017391
		256.5	0.00172183
		256.65	0.0017037
		256.8	0.00168471
		256.95	0.00166488
		257.1	0.00164423
		257.25	0.00162278
		257.4	0.00160056
		257.55	0.00157759
		257.7	0.0015539
		257.85	0.00152953
		258	0.0015045
		258.15	0.00147886
		258.3	0.00145265
		258.45	0.0014259
		258.6	0.00139866
		258.75	0.00137098
		258.9	0.0013429
		259.05	0.00131448
		259.2	0.00128576
		259.35	0.00125679
		259.5	0.00122763
		259.65	0.00119834
		259.8	0.00116896
		259.95	0.00113954
		260.1	0.00111014
		260.25	0.00108081
		260.4	0.00105161
		260.55	0.00102258
		260.7	0.000993767
		260.85	0.000965226
		261	0.000937001
		261.15	0.000909134
		261.3	0.000881668
		261.45	0.000854644
		261.6	0.000828098
		261.75	0.000802066
		261.9	0.00077658
		262.05	0.00075167
		262.2	0.000727364
		262.35	0.000703687
		262.5	0.000680661
		262.65	0.000658306
		262.8	0.000636638
		262.95	0.000615672
		263.1	0.000595421
		263.25	0.000575892
		263.4	0.000557094
		263.55	0.000539031
		263.7	0.000521706
		263.85	0.000505118
		264	0.000489266
		264.15	0.000474146
		264.3	0.000459753
		264.45	0.000446079
		264.6	0.000433116
		264.75	0.000420852
		264.9	0.000409275
		265.05	0.000398373
		265.2	0.00038813
		265.35	0.00037853
		265.5	0.000369557
		265.65	0.000361194
		265.8	0.000353419
		265.95	0.000346216
		266.1	0.000339562
		266.25	0.000333439
		266.4	0.000327824
		266.55	0.000322696
		266.7	0.000318031
		266.85	0.000313808
		267	0.000310005
		267.15	0.000306598
		267.3	0.000303563
		267.45	0.000300879
		267.6	0.000298522
		267.75	0.00029647
		267.9	0.0002947
		268.05	0.000293189
		268.2	0.000291916
		268.35	0.000290859
		268.5	0.000289996
		268.65	0.000289307
		268.8	0.000288773
		268.95	0.000288372
		269.1	0.000288087
		269.25	0.0002879
		269.4	0.000287792
		269.55	0.000287749
		269.7	0.000287754
		269.85	0.000287792
		270	0.000287848
		270.15	0.000287912
		270.3	0.000287972
		270.45	0.000288014
		270.6	0.000288031
		270.75	0.000288012
		270.9	0.00028795
		271.05	0.000287837
		271.2	0.000287667
		271.35	0.000287436
		271.5	0.000287138
		271.65	0.000286771
		271.8	0.000286331
		271.95	0.000285817
		272.1	0.000285229
		272.25	0.000284564
		272.4	0.000283824
		272.55	0.00028301
		272.7	0.000282123
		272.85	0.000281163
		273	0.000280135
		273.15	0.000279039
		273.3	0.000277877
		273.45	0.000276656
		273.6	0.000275376
		273.75	0.000274041
		273.9	0.000272655
		274.05	0.000271219
		274.2	0.000269737
		274.35	0.000268213
		274.5	0.000266649
		274.65	0.000265048
		274.8	0.000263414
		274.95	0.000261746
		275.1	0.000260048
		275.25	0.000258321
		275.4	0.000256566
		275.55	0.000254785
		275.7	0.000252978
		275.85	0.000251145
		276	0.000249287
		276.15	0.000247402
		276.3	0.00024549
		276.45	0.000243553
		276.6	0.000241587
		276.75	0.000239592
		276.9	0.000237566
		277.05	0.000235507
		277.2	0.000233413
		277.35	0.000231284
		277.5	0.000229117
		277.65	0.000226911
		277.8	0.000224662
		277.95	0.000222369
		278.1	0.000220029
		278.25	0.000217642
		278.4	0.000215207
		278.55	0.000212721
		278.7	0.000210182
		278.85	0.000207591
		279	0.000204945
		279.15	0.000202244
		279.3	0.000199488
		279.45	0.000196676
		279.6	0.000193809
		279.75	0.000190887
		279.9	0.000187911
		280.05	0.000184882
		280.2	0.0001818
		280.35	0.000178669
		280.5	0.000175488
		280.65	0.000172262
		280.8	0.000168991
		280.95	0.000165679
		281.1	0.000162329
		281.25	0.000158943
		281.4	0.000155526
		281.55	0.00015208
		281.7	0.00014861
		281.85	0.000145119
		282	0.000141611
		282.15	0.000138091
		282.3	0.000134562
		282.45	0.00013103
		282.6	0.000127497
		282.75	0.000123969
		282.9	0.000120449
		283.05	0.000116943
		283.2	0.000113454
		283.35	0.000109986
		283.5	0.000106544
		283.65	0.000103131
		283.8	9.97516e-05
		283.95	9.64095e-05
		284.1	9.3108e-05
		284.25	8.98507e-05
		284.4	8.66408e-05
		284.55	8.34813e-05
		284.7	8.03753e-05
		284.85	7.73253e-05
		285	7.4334e-05
		285.15	7.14034e-05
		285.3	6.85358e-05
		285.45	6.5733e-05
		285.6	6.29967e-05
		285.75	6.03282e-05
		285.9	5.77289e-05
		286.05	5.51998e-05
		286.2	5.27416e-05
		286.35	5.0355e-05
		286.5	4.80404e-05
		286.65	4.57981e-05
		286.8	4.36281e-05
		286.95	4.15304e-05
		287.1	3.95045e-05
		287.25	3.75502e-05
		287.4	3.56668e-05
		287.55	3.38535e-05
		287.7	3.21096e-05
		287.85	3.04341e-05
		288	2.88251e-05
		288.15	2.7283e-05
		288.3	2.58057e-05
		288.45	2.43918e-05
		288.6	2.30399e-05
		288.75	2.17485e-05
		288.9	2.0516e-05
		289.05	1.93408e-05
		289.2	1.82206e-05
		289.35	1.71551e-05
		289.5	1.61419e-05
		289.65	1.51793e-05
		289.8	1.42654e-05
		289.95	1.33987e-05
		290.1	1.25765e-05
		290.25	1.17988e-05
		290.4	1.10629e-05
		290.55	1.03673e-05
		290.7	9.71008e-06
		290.85	9.08976e-06
		291	8.50469e-06
		291.15	7.95326e-06
		291.3	7.43394e-06
		291.45	6.9452e-06
		291.6	6.48557e-06
		291.75	6.05363e-06
		291.9	5.64797e-06
		292.05	5.26725e-06
		292.2	4.91017e-06
		292.35	4.57548e-06
		292.5	4.26197e-06
		292.65	3.96847e-06
		292.8	3.69387e-06
		292.95	3.4371e-06
		293.1	3.19713e-06
		293.25	2.97299e-06
		293.4	2.76374e-06
		293.55	2.56849e-06
		293.7	2.3864e-06
		293.85	2.21664e-06
		294	2.05847e-06
		294.15	1.91116e-06
		294.3	1.77401e-06
		294.45	1.64637e-06
		294.6	1.52764e-06
		294.75	1.41722e-06
		294.9	1.31458e-06
		295.05	1.21919e-06
		295.2	1.13057e-06
		295.35	1.04826e-06
		295.5	9.71836e-07
		295.65	9.00892e-07
		295.8	8.35051e-07
		295.95	7.73959e-07
		296.1	7.17284e-07
		296.25	6.64716e-07
		296.4	6.15967e-07
		296.55	5.70764e-07
		296.7	5.28856e-07
		296.85	4.90007e-07
		297	4.53997e-07
		297.15	4.20621e-07
		297.3	3.8969e-07
		297.45	3.61026e-07
		297.6	3.34464e-07
		297.75	3.09851e-07
		297.9	2.87044e-07
		298.05	2.65912e-07
		298.2	2.46331e-07
		298.35	2.28189e-07
		298.5	2.11378e-07
		298.65	1.95801e-07
		298.8	1.81368e-07
		298.95	1.67993e-07
		299.1	1.556e-07
		299.25	1.44116e-07
		299.4	1.33474e-07
		299.55	1.23611e-07
		299.7	1.14472e-07
		299.85	1.06001e-07
[truncated: 1 more rows]

## Sheet: PlotDat5
Source sheet	ZirconData	0	0	320	0	0	0
Plot name	ProbDens5	1.6	0	400	0	3198.4	0
Plot Type	16	3.2	0	400	18
1st free col	9	4.8	0	320	18
Sigma Level	2	6.4	0	320	0
Absolute Errs	TRUE	8	0	ErrBox	ErrBox
Symbol Type	1	9.6	0	400	0
Inverse Plot	FALSE	11.2	0	480	0
Color Plot	TRUE	12.8	0	480	24
3D plot	FALSE	14.4	0	400	24
Linear	FALSE	16	0	400	0
Data Range	AA1341:AB1498	17.6	0	ErrBox	ErrBox
Filled Symbols	FALSE	19.2	6.41973e-09	480	0
ConcAge	FALSE	20.8	6.62804e-09	560	0
ConcSwap	FALSE	22.4	6.84266e-09	560	11
1st Symbol-row	1	24	7.06374e-09	480	11
		25.6	7.29149e-09	480	0
		27.2	7.52606e-09	ErrBox	ErrBox
		28.8	7.76767e-09	560	0
		30.4	8.01649e-09	640	0
		32	8.27272e-09	640	5
		33.6	8.53658e-09	560	5
		35.2	8.80825e-09	560	0
		36.8	9.08797e-09	ErrBox	ErrBox
		38.4	9.37593e-09	640	0
		40	9.67237e-09	720	0
		41.6	9.97751e-09	720	2
		43.2	1.02916e-08	640	2
		44.8	1.06148e-08	640	0
		46.4	1.09475e-08	ErrBox	ErrBox
		48	1.12899e-08	720	0
		49.6	1.16421e-08	800	0
		51.2	1.20046e-08	800	8
		52.8	1.23775e-08	720	8
		54.4	1.27611e-08	720	0
		56	1.31557e-08	ErrBox	ErrBox
		57.6	1.35616e-08	800	0
		59.2	1.39791e-08	880	0
		60.8	1.44085e-08	880	6
		62.4	1.48501e-08	800	6
		64	1.53042e-08	800	0
		65.6	1.57711e-08	ErrBox	ErrBox
		67.2	1.62512e-08	880	0
		68.8	1.67448e-08	960	0
		70.4	1.72522e-08	960	3
		72	1.77738e-08	880	3
		73.6	1.83099e-08	880	0
		75.2	1.88609e-08	ErrBox	ErrBox
		76.8	1.94272e-08	960	0
		78.4	2.00091e-08	1040	0
		80	2.06071e-08	1040	5
		81.6	2.12216e-08	960	5
		83.2	2.18529e-08	960	0
		84.8	2.25015e-08	ErrBox	ErrBox
		86.4	2.31677e-08	1040	0
		88	2.38521e-08	1120	0
		89.6	2.45551e-08	1120	5
		91.2	2.52771e-08	1040	5
		92.8	2.60185e-08	1040	0
		94.4	2.678e-08	ErrBox	ErrBox
		96	2.75618e-08	1120	0
		97.6	2.83646e-08	1200	0
		99.2	2.91888e-08	1200	5
		100.8	3.00349e-08	1120	5
		102.4	3.09034e-08	1120	0
		104	3.1795e-08	ErrBox	ErrBox
		105.6	3.27101e-08	1200	0
		107.2	3.36492e-08	1280	0
		108.8	3.4613e-08	1280	4
		110.4	3.5602e-08	1200	4
		112	3.66168e-08	1200	0
		113.6	3.7658e-08	ErrBox	ErrBox
		115.2	3.87263e-08	1280	0
		116.8	3.98221e-08	1360	0
		118.4	4.09462e-08	1360	8
		120	4.20992e-08	1280	8
		121.6	4.32818e-08	1280	0
		123.2	4.44945e-08	ErrBox	ErrBox
		124.8	4.57382e-08	1440	0
		126.4	4.70136e-08	1520	0
		128	4.83212e-08	1520	2
		129.6	4.96618e-08	1440	2
		131.2	5.10363e-08	1440	0
		132.8	5.24452e-08	ErrBox	ErrBox
		134.4	5.38894e-08	1520	0
		136	5.53697e-08	1600	0
		137.6	5.68868e-08	1600	1
		139.2	5.84415e-08	1520	1
		140.8	6.00348e-08	1520	0
		142.4	6.16673e-08	ErrBox	ErrBox
		144	6.33399e-08	1600	0
		145.6	6.50535e-08	1680	0
		147.2	6.68091e-08	1680	9
		148.8	6.86074e-08	1600	9
		150.4	7.04493e-08	1600	0
		152	7.23359e-08	ErrBox	ErrBox
		153.6	7.42679e-08	1680	0
		155.2	7.62465e-08	1760	0
		156.8	7.82725e-08	1760	4
		158.4	8.0347e-08	1680	4
		160	8.24709e-08	1680	0
		161.6	8.46453e-08	ErrBox	ErrBox
		163.2	8.68711e-08	1760	0
		164.8	8.91495e-08	1840	0
		166.4	9.14815e-08	1840	5
		168	9.38682e-08	1760	5
		169.6	9.63107e-08	1760	0
		171.2	9.88102e-08	ErrBox	ErrBox
		172.8	1.01368e-07	1840	0
		174.4	1.03984e-07	1920	0
		176	1.06661e-07	1920	5
		177.6	1.094e-07	1840	5
		179.2	1.12202e-07	1840	0
		180.8	1.15067e-07	ErrBox	ErrBox
		182.4	1.17998e-07	1920	0
		184	1.20995e-07	2000	0
		185.6	1.2406e-07	2000	2
		187.2	1.27194e-07	1920	2
		188.8	1.30399e-07	1920	0
		190.4	1.33675e-07	ErrBox	ErrBox
		192	1.37024e-07	2000	0
		193.6	1.40448e-07	2080	0
		195.2	1.43948e-07	2080	2
		196.8	1.47525e-07	2000	2
		198.4	1.51181e-07	2000	0
		200	1.54917e-07	ErrBox	ErrBox
		201.6	1.58735e-07	2080	0
		203.2	1.62635e-07	2160	0
		204.8	1.66621e-07	2160	2
		206.4	1.70693e-07	2080	2
		208	1.74852e-07	2080	0
		209.6	1.79101e-07	ErrBox	ErrBox
		211.2	1.83441e-07	2240	0
		212.8	1.87873e-07	2320	0
		214.4	1.92399e-07	2320	3
		216	1.97022e-07	2240	3
		217.6	2.01741e-07	2240	0
		219.2	2.0656e-07	ErrBox	ErrBox
		220.8	2.1148e-07	2320	0
		222.4	2.16503e-07	2400	0
		224	2.2163e-07	2400	4
		225.6	2.26863e-07	2320	4
		227.2	2.32204e-07	2320	0
		228.8	2.37654e-07	ErrBox	ErrBox
		230.4	2.43217e-07	2400	0
		232	2.48893e-07	2480	0
		233.6	2.54684e-07	2480	1
		235.2	2.60593e-07	2400	1
		236.8	2.6662e-07	2400	0
		238.4	2.72769e-07	ErrBox	ErrBox
		240	2.79041e-07	2480	0
		241.6	2.85438e-07	2560	0
		243.2	2.91962e-07	2560	2
		244.8	2.98615e-07	2480	2
		246.4	3.05399e-07	2480	0
		248	3.12316e-07	ErrBox	ErrBox
		249.6	3.19368e-07	2560	0
		251.2	3.26558e-07	2640	0
		252.8	3.33887e-07	2640	5
		254.4	3.41358e-07	2560	5
		256	3.48973e-07	2560	0
		257.6	3.56733e-07	ErrBox	ErrBox
		259.2	3.64642e-07	2640	0
		260.8	3.727e-07	2720	0
		262.4	3.80912e-07	2720	4
		264	3.89278e-07	2640	4
		265.6	3.97801e-07	2640	0
		267.2	4.06483e-07	ErrBox	ErrBox
		268.8	4.15327e-07	2720	0
		270.4	4.24335e-07	2800	0
		272	4.33509e-07	2800	2
		273.6	4.42852e-07	2720	2
		275.2	4.52366e-07	2720	0
		276.8	4.62053e-07	ErrBox	ErrBox
		278.4	4.71916e-07	2800	0
		280	4.81957e-07	2880	0
		281.6	4.92178e-07	2880	1
		283.2	5.02583e-07	2800	1
		284.8	5.13173e-07	2800	0
		286.4	5.23951e-07	ErrBox	ErrBox
		288	5.42195e-07
		289.6	5.62591e-07
		291.2	6.03443e-07
		292.8	6.91383e-07
		294.4	8.40056e-07
		296	1.13006e-06
		297.6	1.69334e-06
		299.2	2.76984e-06
		300.8	4.77878e-06
		302.4	8.41935e-06
		304	1.47967e-05
		305.6	2.55712e-05
		307.2	4.30234e-05
		308.8	7.01089e-05
		310.4	0.000110311
		312	0.000167353
		313.6	0.000244827
		315.2	0.000345992
		316.8	0.000474035
		318.4	0.00063317
		320	0.00083033
		321.6	0.00107588
		323.2	0.00138006
		324.8	0.00174219
		326.4	0.00213491
		328	0.00249519
		329.6	0.00273721
		331.2	0.00279081
		332.8	0.00264521
		334.4	0.00236484
		336	0.00205869
		337.6	0.00181849
		339.2	0.00166739
		340.8	0.00155726
		342.4	0.00141752
		344	0.00121549
		345.6	0.000978536
		347.2	0.000766784
		348.8	0.000630621
		350.4	0.000589556
		352	0.000637059
		353.6	0.000753589
		355.2	0.000914763
		356.8	0.00109558
		358.4	0.00127454
		360	0.00143701
		361.6	0.00157403
		363.2	0.00167664
		364.8	0.00173136
		366.4	0.0017231
		368	0.00164459
		369.6	0.00150457
		371.2	0.00132698
		372.8	0.00114158
		374.4	0.000972775
		376	0.00083344
		377.6	0.00072544
		379.2	0.000644148
		380.8	0.000583676
		382.4	0.000540902
		384	0.000517503
		385.6	0.000520101
		387.2	0.000558135
		388.8	0.000640229
		390.4	0.000770047
		392	0.000943315
		393.6	0.00114763
		395.2	0.00136563
		396.8	0.00158038
		398.4	0.00178083
		400	0.0019643
		401.6	0.00213461
		403.2	0.00229619
		404.8	0.00244736
		406.4	0.00257661
		408	0.00266446
		409.6	0.00269058
		411.2	0.002643
		412.8	0.00252484
		414.4	0.00235564
		416	0.00216703
		417.6	0.00199512
		419.2	0.00187271
		420.8	0.00182319
		422.4	0.00185674
		424	0.00196875
		425.6	0.00214056
		427.2	0.0023429
		428.8	0.0025419
		430.4	0.00270662
		432	0.00281559
		433.6	0.00286078
		435.2	0.00284754
		436.8	0.00279128
		438.4	0.00271211
		440	0.00262933
		441.6	0.00255698
		443.2	0.00250123
		444.8	0.00245993
		446.4	0.00242406
		448	0.0023808
		449.6	0.00231715
		451.2	0.0022235
		452.8	0.00209585
		454.4	0.00193656
		456	0.00175346
		457.6	0.00155797
		459.2	0.0013628
		460.8	0.00117988
		462.4	0.0010186
		464	0.000884806
		465.6	0.000780294
		467.2	0.000703018
		468.8	0.000647926
		470.4	0.000608462
		472	0.000578202
		473.6	0.000552445
		475.2	0.000529266
		476.8	0.00050978
		478.4	0.000497571
		480	0.000497435
		481.6	0.000513776
		483.2	0.0005491
		484.8	0.000602905
		486.4	0.000671422
		488	0.000748085
		489.6	0.000824796
		491.2	0.000893469
		492.8	0.000947737
		494.4	0.000984173
		496	0.00100278
		497.6	0.00100672
		499.2	0.00100134
		500.8	0.000992897
		502.4	0.000987315
		504	0.000989306
		505.6	0.00100205
		507.2	0.00102729
		508.8	0.00106573
		510.4	0.00111733
		512	0.00118136
		513.6	0.0012559
		515.2	0.00133692
		516.8	0.00141727
		518.4	0.00148634
		520	0.00153114
		521.6	0.00153905
		523.2	0.00150172
		524.8	0.00141862
		526.4	0.00129835
		528	0.00115697
		529.6	0.0010136
		531.2	0.000885343
		532.8	0.000783339
		534.4	0.000711491
		536	0.000667622
		537.6	0.000646018
		539.2	0.000639978
		540.8	0.000643443
		542.4	0.000651516
		544	0.000660208
		545.6	0.00066599
		547.2	0.000665533
		548.8	0.000655859
		550.4	0.000634748
		552	0.0006012
		553.6	0.000555747
		555.2	0.000500439
		556.8	0.000438572
		558.4	0.000374144
		560	0.000311273
		561.6	0.000253702
		563.2	0.000204455
		564.8	0.000165683
		566.4	0.000138666
		568	0.000123918
		569.6	0.000121303
		571.2	0.000130129
		572.8	0.000149208
		574.4	0.000176868
		576	0.000210988
		577.6	0.000249077
		579.2	0.000288491
		580.8	0.000326638
		582.4	0.000361255
		584	0.000390697
		585.6	0.000414071
		587.2	0.000431262
		588.8	0.000442837
		590.4	0.000449805
		592	0.000453418
		593.6	0.000454976
		595.2	0.00045576
		596.8	0.00045701
		598.4	0.000460009
		600	0.000466113
		601.6	0.000476708
		603.2	0.000493048
		604.8	0.000516003
		606.4	0.000545757
		608	0.000581565
		609.6	0.000621635
		611.2	0.000663195
		612.8	0.000702749
		614.4	0.000736489
		616	0.000760741
		617.6	0.000772472
		619.2	0.000769633
		620.8	0.00075139
		622.4	0.000718183
		624	0.000671627
		625.6	0.000614275
		627.2	0.00054931
		628.8	0.000480189
		630.4	0.000410322
		632	0.000342771
		633.6	0.000280039
		635.2	0.000223953
		636.8	0.00017563
		638.4	0.000135537
		640	0.000103604
		641.6	7.93746e-05
		643.2	6.21822e-05
		644.8	5.13013e-05
		646.4	4.60716e-05
		648	4.59827e-05
		649.6	5.0714e-05
		651.2	6.01304e-05
		652.8	7.42398e-05
		654.4	9.31207e-05
		656	0.000116825
		657.6	0.000145292
		659.2	0.000178219
		660.8	0.000215006
		662.4	0.00025469
		664	0.000295936
		665.6	0.000337077
		667.2	0.000376191
		668.8	0.000411268
		670.4	0.000440325
		672	0.000461623
		673.6	0.000473834
		675.2	0.000476167
		676.8	0.000468465
		678.4	0.00045121
		680	0.000425487
		681.6	0.000392859
		683.2	0.000355226
		684.8	0.000314624
		686.4	0.000273049
		688	0.000232321
		689.6	0.000193953
		691.2	0.000159058
		692.8	0.000128384
		694.4	0.000102283
		696	8.07931e-05
		697.6	6.37407e-05
		699.2	5.07884e-05
		700.8	4.15509e-05
		702.4	3.56574e-05
		704	3.28136e-05
		705.6	3.28448e-05
		707.2	3.57197e-05
		708.8	4.15593e-05
		710.4	5.06304e-05
		712	6.33261e-05
		713.6	8.01403e-05
		715.2	0.000101598
		716.8	0.000128237
		718.4	0.000160532
		720	0.000198771
		721.6	0.000242997
		723.2	0.000292926
		724.8	0.000347829
		726.4	0.000406479
		728	0.000467115
		729.6	0.000527464
		731.2	0.00058486
		732.8	0.000636429
		734.4	0.000679352
		736	0.000711183
		737.6	0.000730153
		739.2	0.000735486
		740.8	0.00072757
		742.4	0.000708014
		744	0.000679549
		745.6	0.00064578
		747.2	0.000610819
		748.8	0.000578828
		750.4	0.000553583
		752	0.0005381
		753.6	0.000534316
		755.2	0.000542944
		756.8	0.000563441
		758.4	0.000594118
		760	0.000632352
		761.6	0.000674874
		763.2	0.000718067
		764.8	0.00075833
		766.4	0.000792345
		768	0.000817339
		769.6	0.000831282
		771.2	0.000832983
		772.8	0.000822098
		774.4	0.000799115
		776	0.000765207
		777.6	0.000722111
		779.2	0.000671931
		780.8	0.000616958
		782.4	0.000559494
		784	0.000501735
		785.6	0.000445636
		787.2	0.000392847
		788.8	0.000344695
		790.4	0.000302166
		792	0.000265937
		793.6	0.000236384
		795.2	0.000213653
		796.8	0.000197639
		798.4	0.000188085
		800	0.00018456
		801.6	0.000186521
		803.2	0.00019331
		804.8	0.000204183
		806.4	0.000218332
		808	0.000234916
		809.6	0.000253084
		811.2	0.000272017
		812.8	0.000290963
		814.4	0.000309271
		816	0.000326422
		817.6	0.000342082
		819.2	0.000356072
		820.8	0.000368415
		822.4	0.000379307
		824	0.000389132
		825.6	0.000398359
		827.2	0.000407577
		828.8	0.000417397
		830.4	0.000428405
		832	0.000441115
		833.6	0.000455921
		835.2	0.000473028
		836.8	0.000492471
		838.4	0.000514081
		840	0.000537513
		841.6	0.00056228
		843.2	0.000587816
		844.8	0.000613541
		846.4	0.000638924
		848	0.000663522
		849.6	0.000687005
		851.2	0.000709098
		852.8	0.000729548
		854.4	0.000748013
		856	0.000763946
		857.6	0.000776538
		859.2	0.000784721
		860.8	0.000787215
		862.4	0.000782691
		864	0.000769989
		865.6	0.000748355
		867.2	0.000717656
		868.8	0.0006785
		870.4	0.000632255
		872	0.000580925
		873.6	0.000526929
		875.2	0.000472836
		876.8	0.000421035
		878.4	0.000373526
		880	0.000331747
		881.6	0.000296517
		883.2	0.000268062
		884.8	0.000246122
		886.4	0.000230084
		888	0.000219133
		889.6	0.000212353
		891.2	0.000208867
		892.8	0.000207846
		894.4	0.000208599
		896	0.000210519
		897.6	0.000213148
		899.2	0.000216082
		900.8	0.000219029
		902.4	0.000221756
		904	0.000224092
		905.6	0.000225913
		907.2	0.000227154
		908.8	0.000227774
		910.4	0.000227793
		912	0.000227252
		913.6	0.000226232
		915.2	0.000224866
		916.8	0.000223302
		918.4	0.000221708
		920	0.000220291
		921.6	0.000219275
		923.2	0.000218897
		924.8	0.000219398
		926.4	0.000221031
		928	0.000224022
		929.6	0.000228586
		931.2	0.000234915
		932.8	0.000243153
		934.4	0.000253412
		936	0.000265722
		937.6	0.000280055
		939.2	0.000296305
		940.8	0.000314289
		942.4	0.000333744
		944	0.000354334
		945.6	0.000375662
		947.2	0.000397277
		948.8	0.000418709
		950.4	0.000439462
		952	0.000459058
		953.6	0.000477078
		955.2	0.000493146
		956.8	0.00050697
		958.4	0.000518369
		960	0.000527263
		961.6	0.00053369
		963.2	0.000537775
		964.8	0.000539756
		966.4	0.000539941
		968	0.000538695
		969.6	0.000536407
		971.2	0.000533473
		972.8	0.000530263
		974.4	0.000527104
		976	0.00052424
		977.6	0.000521852
		979.2	0.000520029
		980.8	0.000518769
		982.4	0.000517989
		984	0.000517535
		985.6	0.000517197
		987.2	0.00051673
		988.8	0.000515873
		990.4	0.000514367
		992	0.000511998
		993.6	0.000508573
		995.2	0.000503964
		996.8	0.000498114
		998.4	0.000491014
		1000	0.000482739
		1001.6	0.000473418
		1003.2	0.000463229
		1004.8	0.000452387
		1006.4	0.00044113
		1008	0.000429704
		1009.6	0.00041835
		1011.2	0.000407291
		1012.8	0.000396722
		1014.4	0.000386806
		1016	0.000377665
		1017.6	0.000369383
		1019.2	0.000362007
		1020.8	0.000355547
		1022.4	0.00034998
		1024	0.000345274
		1025.6	0.000341361
		1027.2	0.000338167
		1028.8	0.000335615
		1030.4	0.000333622
		1032	0.000332109
		1033.6	0.000331003
		1035.2	0.000330235
		1036.8	0.000329746
		1038.4	0.000329486
		1040	0.000329411
		1041.6	0.000329488
		1043.2	0.000329687
		1044.8	0.000329983
		1046.4	0.000330371
		1048	0.00033083
		1049.6	0.000331351
		1051.2	0.000331927
		1052.8	0.000332555
		1054.4	0.000333228
		1056	0.000333946
		1057.6	0.000334705
		1059.2	0.000335504
		1060.8	0.000336334
		1062.4	0.000337207
		1064	0.000338113
		1065.6	0.000339049
		1067.2	0.000340013
		1068.8	0.000341003
		1070.4	0.000342016
		1072	0.000343051
		1073.6	0.000344103
		1075.2	0.00034517
		1076.8	0.00034625
		1078.4	0.00034734
		1080	0.000348436
		1081.6	0.000349536
		1083.2	0.000350639
		1084.8	0.00035174
		1086.4	0.000352837
		1088	0.000353929
		1089.6	0.000355013
		1091.2	0.000356093
		1092.8	0.000357156
		1094.4	0.000358205
		1096	0.000359239
		1097.6	0.000360256
		1099.2	0.000361255
		1100.8	0.000362236
		1102.4	0.000363196
		1104	0.000364136
		1105.6	0.000365054
		1107.2	0.00036595
		1108.8	0.000366823
		1110.4	0.000367673
		1112	0.0003685
		1113.6	0.000369304
		1115.2	0.000370085
		1116.8	0.000370842
		1118.4	0.000371576
		1120	0.000372287
		1121.6	0.000372975
		1123.2	0.000373641
		1124.8	0.000374285
		1126.4	0.000374907
		1128	0.000375508
		1129.6	0.000376088
		1131.2	0.000376648
		1132.8	0.000377188
		1134.4	0.000377709
		1136	0.000378219
		1137.6	0.000378704
		1139.2	0.000379171
		1140.8	0.000379622
		1142.4	0.000380057
		1144	0.000380475
		1145.6	0.000380879
		1147.2	0.000381263
		1148.8	0.000381639
		1150.4	0.000382002
		1152	0.000382351
		1153.6	0.000382688
		1155.2	0.000383013
		1156.8	0.000383332
		1158.4	0.000383634
		1160	0.000383925
		1161.6	0.000384206
		1163.2	0.000384476
		1164.8	0.000384737
		1166.4	0.000384988
		1168	0.00038523
		1169.6	0.000385462
		1171.2	0.000385686
		1172.8	0.000385901
		1174.4	0.000386107
		1176	0.000386305
		1177.6	0.000386494
		1179.2	0.000386674
		1180.8	0.000386846
		1182.4	0.000387009
		1184	0.000387163
		1185.6	0.000387309
		1187.2	0.000387446
		1188.8	0.000387573
		1190.4	0.000387698
		1192	0.000387806
		1193.6	0.000387905
		1195.2	0.000387994
		1196.8	0.000388073
		1198.4	0.00038814
		1200	0.000388196
		1201.6	0.000388241
		1203.2	0.000388273
		1204.8	0.000388293
		1206.4	0.0003883
		1208	0.000388293
		1209.6	0.000388272
		1211.2	0.000388237
		1212.8	0.000388187
		1214.4	0.000388121
		1216	0.000388038
		1217.6	0.000387939
		1219.2	0.000387823
		1220.8	0.000387688
		1222.4	0.000387535
		1224	0.000387363
		1225.6	0.000387171
		1227.2	0.000386958
		1228.8	0.000386731
		1230.4	0.000386476
		1232	0.000386198
		1233.6	0.000385898
		1235.2	0.000385574
		1236.8	0.000385225
		1238.4	0.000384852
		1240	0.000384454
		1241.6	0.000384029
		1243.2	0.000383578
		1244.8	0.0003831
		1246.4	0.000382594
		1248	0.00038206
		1249.6	0.000381497
		1251.2	0.000380905
		1252.8	0.000380283
		1254.4	0.000379631
		1256	0.000378956
		1257.6	0.000378243
		1259.2	0.000377498
		1260.8	0.000376723
		1262.4	0.000375915
		1264	0.000375074
		1265.6	0.000374202
		1267.2	0.000373296
		1268.8	0.000372357
		1270.4	0.000371385
		1272	0.00037038
		1273.6	0.000369341
		1275.2	0.000368275
		1276.8	0.00036717
		1278.4	0.000366031
		1280	0.000364858
		1281.6	0.000363651
		1283.2	0.000362411
		1284.8	0.000361138
		1286.4	0.000359831
		1288	0.000358491
		1289.6	0.000357118
		1291.2	0.000355713
		1292.8	0.000354275
		1294.4	0.000352805
		1296	0.000351304
		1297.6	0.000349771
		1299.2	0.000348221
		1300.8	0.000346628
		1302.4	0.000345005
		1304	0.000343347
		1305.6	0.000341667
		1307.2	0.000339958
		1308.8	0.000338229
		1310.4	0.000336466
		1312	0.000334684
		1313.6	0.000332871
		1315.2	0.000331032
		1316.8	0.00032917
		1318.4	0.000327285
		1320	0.000325377
		1321.6	0.000323448
		1323.2	0.000321499
		1324.8	0.000319529
		1326.4	0.000317548
		1328	0.000315542
		1329.6	0.00031352
		1331.2	0.000311482
		1332.8	0.000309436
		1334.4	0.00030737
		1336	0.000305291
		1337.6	0.0003032
		1339.2	0.000301106
		1340.8	0.000298996
		1342.4	0.000296877
		1344	0.000294752
		1345.6	0.00029262
		1347.2	0.000290483
		1348.8	0.000288343
		1350.4	0.000286199
		1352	0.000284055
		1353.6	0.00028191
		1355.2	0.000279765
		1356.8	0.000277623
		1358.4	0.000275484
		1360	0.000273349
		1361.6	0.000271213
		1363.2	0.000269091
		1364.8	0.000266977
		1366.4	0.000264871
		1368	0.000262776
		1369.6	0.000260692
		1371.2	0.000258621
		1372.8	0.000256563
		1374.4	0.00025452
		1376	0.000252492
		1377.6	0.000250476
		1379.2	0.000248485
		1380.8	0.000246512
		1382.4	0.00024456
		1384	0.00024263
		1385.6	0.000240722
		1387.2	0.000238838
		1388.8	0.000236978
		1390.4	0.000235144
		1392	0.000233336
		1393.6	0.00023155
		1395.2	0.000229794
		1396.8	0.000228073
		1398.4	0.000226383
		1400	0.000224725
		1401.6	0.000223099
		1403.2	0.0002215
		1404.8	0.000219942
		1406.4	0.000218426
		1408	0.000216939
		1409.6	0.000215489
		1411.2	0.000214077
		1412.8	0.000212703
		1414.4	0.000211369
		1416	0.000210074
		1417.6	0.00020882
		1419.2	0.000207614
		1420.8	0.000206444
		1422.4	0.000205317
		1424	0.000204234
		1425.6	0.000203196
		1427.2	0.000202208
		1428.8	0.000201261
		1430.4	0.000200359
		1432	0.000199503
		1433.6	0.000198695
		1435.2	0.000197934
		1436.8	0.000197215
		1438.4	0.000196552
		1440	0.000195937
		1441.6	0.000195371
		1443.2	0.000194856
		1444.8	0.00019439
		1446.4	0.000193974
		1448	0.00019361
		1449.6	0.000193303
		1451.2	0.000193041
		1452.8	0.000192831
		1454.4	0.000192672
		1456	0.000192566
		1457.6	0.000192511
		1459.2	0.000192509
		1460.8	0.00019256
		1462.4	0.000192662
		1464	0.000192818
		1465.6	0.000193026
		1467.2	0.000193287
		1468.8	0.0001936
		1470.4	0.000193966
		1472	0.000194378
		1473.6	0.000194849
		1475.2	0.000195372
		1476.8	0.000195948
		1478.4	0.000196575
		1480	0.000197254
		1481.6	0.000197984
		1483.2	0.000198772
		1484.8	0.000199605
		1486.4	0.000200489
		1488	0.000201423
		1489.6	0.0002024
		1491.2	0.000203434
		1492.8	0.00020451
		1494.4	0.000205642
		1496	0.000206821
		1497.6	0.000208048
		1499.2	0.000209321
		1500.8	0.000210641
		1502.4	0.000212007
		1504	0.000213417
		1505.6	0.000214878
		1507.2	0.000216377
		1508.8	0.000217919
		1510.4	0.000219503
		1512	0.000221128
		1513.6	0.000222793
		1515.2	0.000224499
		1516.8	0.000226243
		1518.4	0.000228024
		1520	0.000229843
		1521.6	0.000231698
		1523.2	0.000233587
		1524.8	0.000235504
		1526.4	0.000237461
		1528	0.000239449
		1529.6	0.000241469
		1531.2	0.000243511
		1532.8	0.000245588
		1534.4	0.000247693
		1536	0.000249823
		1537.6	0.000251979
		1539.2	0.000254157
		1540.8	0.000256359
		1542.4	0.000258581
		1544	0.000260817
		1545.6	0.000263077
		1547.2	0.000265355
		1548.8	0.000267649
		1550.4	0.000269957
		1552	0.000272278
		1553.6	0.000274605
		1555.2	0.000276949
		1556.8	0.000279309
		1558.4	0.000281669
		1560	0.000284037
		1561.6	0.000286409
		1563.2	0.000288784
		1564.8	0.000291162
		1566.4	0.00029354
		1568	0.000295917
		1569.6	0.000298293
		1571.2	0.000300665
		1572.8	0.000303032
		1574.4	0.000305393
		1576	0.000307746
		1577.6	0.00031009
		1579.2	0.000312424
		1580.8	0.000314746
		1582.4	0.000317055
		1584	0.00031935
		1585.6	0.00032163
		1587.2	0.000323892
		1588.8	0.000326137
		1590.4	0.000328356
		1592	0.000330561
		1593.6	0.000332744
		1595.2	0.000334905
		1596.8	0.000337041
		1598.4	0.000339152
		1600	0.000341237
		1601.6	0.000343294
		1603.2	0.00034533
		1604.8	0.00034733
		1606.4	0.000349301
		1608	0.000351241
		1609.6	0.000353142
		1611.2	0.000355016
		1612.8	0.000356857
		1614.4	0.000358663
		1616	0.000360433
		1617.6	0.000362167
		1619.2	0.000363864
		1620.8	0.000365524
		1622.4	0.000367145
		1624	0.000368733
		1625.6	0.000370276
		1627.2	0.000371779
		1628.8	0.000373242
		1630.4	0.000374663
		1632	0.000376043
		1633.6	0.000377381
		1635.2	0.000378677
		1636.8	0.00037993
		1638.4	0.00038114
		1640	0.000382308
		1641.6	0.000383431
		1643.2	0.000384512
		1644.8	0.000385548
		1646.4	0.000386541
		1648	0.000387489
		1649.6	0.000388394
		1651.2	0.000389254
		1652.8	0.00039007
		1654.4	0.000390842
		1656	0.00039157
		1657.6	0.000392254
		1659.2	0.000392888
		1660.8	0.000393485
		1662.4	0.000394038
		1664	0.000394554
		1665.6	0.000395021
		1667.2	0.000395444
		1668.8	0.000395819
		1670.4	0.000396158
		1672	0.000396454
		1673.6	0.000396709
		1675.2	0.000396922
		1676.8	0.000397093
		1678.4	0.000397224
		1680	0.000397315
		1681.6	0.000397365
		1683.2	0.000397376
		1684.8	0.000397347
		1686.4	0.00039728
		1688	0.000397174
		1689.6	0.000397031
		1691.2	0.00039685
		1692.8	0.000396633
		1694.4	0.000396379
		1696	0.00039609
		1697.6	0.000395765
		1699.2	0.000395405
		1700.8	0.000395012
		1702.4	0.000394585
		1704	0.000394124
		1705.6	0.000393632
		1707.2	0.000393101
		1708.8	0.000392546
		1710.4	0.000391954
		1712	0.000391338
		1713.6	0.000390692
		1715.2	0.000390018
		1716.8	0.000389315
		1718.4	0.000388585
		1720	0.000387827
		1721.6	0.000387043
		1723.2	0.000386233
		1724.8	0.000385398
		1726.4	0.000384538
		1728	0.000383654
		1729.6	0.00038274
		1731.2	0.00038181
		1732.8	0.000380857
		1734.4	0.000379877
		1736	0.000378882
		1737.6	0.000377867
		1739.2	0.000376832
		1740.8	0.000375784
		1742.4	0.000374711
		1744	0.00037362
		1745.6	0.000372511
		1747.2	0.000371386
		1748.8	0.000370244
		1750.4	0.000369086
		1752	0.000367913
		1753.6	0.000366726
		1755.2	0.000365525
		1756.8	0.00036431
		1758.4	0.000363082
		1760	0.000361842
		1761.6	0.00036059
		1763.2	0.000359326
		1764.8	0.000358052
		1766.4	0.000356768
		1768	0.000355474
		1769.6	0.000354165
		1771.2	0.000352853
		1772.8	0.00035154
		1774.4	0.000350214
		1776	0.00034888
		1777.6	0.000347541
		1779.2	0.000346195
		1780.8	0.000344843
		1782.4	0.000343486
		1784	0.000342125
		1785.6	0.00034076
		1787.2	0.000339391
		1788.8	0.000338019
		1790.4	0.000336644
		1792	0.000335268
		1793.6	0.000333889
		1795.2	0.000332509
		1796.8	0.000331128
		1798.4	0.000329746
		1800	0.000328365
		1801.6	0.000326983
		1803.2	0.000325603
		1804.8	0.000324223
		1806.4	0.000322845
		1808	0.000321469
		1809.6	0.000320095
		1811.2	0.000318723
		1812.8	0.000317354
		1814.4	0.000315988
		1816	0.000314626
		1817.6	0.000313268
		1819.2	0.000311913
		1820.8	0.000310563
		1822.4	0.000309217
		1824	0.000307876
		1825.6	0.00030654
		1827.2	0.000305209
		1828.8	0.000303883
		1830.4	0.000302563
		1832	0.000301248
		1833.6	0.000299939
		1835.2	0.000298636
		1836.8	0.000297339
		1838.4	0.000296048
		1840	0.000294764
		1841.6	0.000293485
		1843.2	0.000292212
		1844.8	0.000290946
		1846.4	0.000289686
		1848	0.000288432
		1849.6	0.000287184
		1851.2	0.000285952
		1852.8	0.000284727
		1854.4	0.000283518
		1856	0.000282333
		1857.6	0.000281186
		1859.2	0.000280101
		1860.8	0.000279114
		1862.4	0.000278283
		1864	0.000277692
		1865.6	0.000277473
		1867.2	0.000277785
		1868.8	0.000278856
		1870.4	0.000280973
		1872	0.000284479
		1873.6	0.000289769
		1875.2	0.000297263
		1876.8	0.000307374
		1878.4	0.00032046
		1880	0.000336772
		1881.6	0.000356397
		1883.2	0.000379204
		1884.8	0.000404843
		1886.4	0.000432702
		1888	0.000461961
		1889.6	0.000491656
		1891.2	0.000520726
		1892.8	0.00054815
		1894.4	0.000572992
		1896	0.000594497
		1897.6	0.000612077
		1899.2	0.000625336
		1900.8	0.000634028
		1902.4	0.000638012
		1904	0.000637208
		1905.6	0.000631579
		1907.2	0.000621132
		1908.8	0.000605953
		1910.4	0.000586256
		1912	0.000562429
		1913.6	0.000535067
		1915.2	0.000504972
		1916.8	0.000473133
		1918.4	0.000440629
		1920	0.000408557
		1921.6	0.00037793
		1923.2	0.000349596
		1924.8	0.000324173
		1926.4	0.000302025
		1928	0.000283264
		1929.6	0.000267789
		1931.2	0.000255328
		1932.8	0.000245505
		1934.4	0.000237896
		1936	0.000232057
		1937.6	0.000227586
		1939.2	0.000224147
		1940.8	0.000221446
		1942.4	0.000219255
		1944	0.000217418
		1945.6	0.000215806
		1947.2	0.000214335
		1948.8	0.00021295
		1950.4	0.000211617
		1952	0.000210313
		1953.6	0.000209025
		1955.2	0.000207746
		1956.8	0.000206468
		1958.4	0.0002052
		1960	0.000203926
		1961.6	0.00020266
		1963.2	0.00020139
		1964.8	0.000200128
		1966.4	0.000198869
		1968	0.000197612
		1969.6	0.000196359
		1971.2	0.000195104
		1972.8	0.000193853
		1974.4	0.000192614
		1976	0.00019138
		1977.6	0.000190151
		1979.2	0.000188928
		1980.8	0.000187711
		1982.4	0.000186502
		1984	0.000185299
		1985.6	0.000184104
		1987.2	0.000182924
		1988.8	0.000181746
		1990.4	0.000180577
		1992	0.000179417
		1993.6	0.000178266
		1995.2	0.000177126
		1996.8	0.000175996
		1998.4	0.000174877
		2000	0.000173768
		2001.6	0.000172671
		2003.2	0.000171584
		2004.8	0.000170508
		2006.4	0.000169444
		2008	0.000168392
		2009.6	0.000167351
		2011.2	0.000166322
		2012.8	0.000165305
		2014.4	0.0001643
		2016	0.000163307
		2017.6	0.000162326
		2019.2	0.000161364
		2020.8	0.000160408
		2022.4	0.000159463
		2024	0.000158531
		2025.6	0.000157611
		2027.2	0.000156696
		2028.8	0.000155799
		2030.4	0.000154914
		2032	0.000154041
		2033.6	0.000153179
		2035.2	0.000152328
		2036.8	0.000151487
		2038.4	0.000150652
		2040	0.000149833
		2041.6	0.000149024
		2043.2	0.000148232
		2044.8	0.000147444
		2046.4	0.000146665
		2048	0.000145902
		2049.6	0.000145141
		2051.2	0.00014439
		2052.8	0.000143653
		2054.4	0.000142919
		2056	0.000142193
		2057.6	0.000141475
		2059.2	0.000140764
		2060.8	0.00014006
		2062.4	0.000139363
		2064	0.000138674
		2065.6	0.000137991
		2067.2	0.000137314
		2068.8	0.000136643
		2070.4	0.000135978
		2072	0.000135319
		2073.6	0.000134666
		2075.2	0.000134018
		2076.8	0.000133376
		2078.4	0.000132739
		2080	0.000132107
		2081.6	0.00013148
		2083.2	0.000130865
		2084.8	0.000130248
		2086.4	0.000129637
		2088	0.00012903
		2089.6	0.000128423
		2091.2	0.000127827
		2092.8	0.000127243
		2094.4	0.000126658
		2096	0.000126078
		2097.6	0.000125504
		2099.2	0.000124936
		2100.8	0.000124374
		2102.4	0.000123818
		2104	0.000123268
		2105.6	0.000122725
		2107.2	0.000122189
		2108.8	0.000121666
		2110.4	0.000121145
		2112	0.000120632
		2113.6	0.000120127
		2115.2	0.000119632
		2116.8	0.000119139
		2118.4	0.000118656
		2120	0.00011819
		2121.6	0.000117735
		2123.2	0.00011729
		2124.8	0.000116857
		2126.4	0.000116436
		2128	0.000116028
		2129.6	0.000115633
		2131.2	0.000115251
		2132.8	0.000114884
		2134.4	0.000114531
		2136	0.000114195
		2137.6	0.000113874
		2139.2	0.00011357
		2140.8	0.000113283
		2142.4	0.000113014
		2144	0.000112758
		2145.6	0.000112527
		2147.2	0.000112316
		2148.8	0.000112126
		2150.4	0.000111956
		2152	0.000111809
		2153.6	0.000111683
		2155.2	0.000111581
		2156.8	0.000111502
		2158.4	0.00011144
		2160	0.00011141
		2161.6	0.000111405
		2163.2	0.000111426
		2164.8	0.000111473
		2166.4	0.000111554
		2168	0.000111655
		2169.6	0.000111785
		2171.2	0.000111943
		2172.8	0.000112129
		2174.4	0.000112345
		2176	0.00011259
		2177.6	0.000112865
		2179.2	0.00011317
		2180.8	0.000113507
		2182.4	0.000113874
		2184	0.000114272
		2185.6	0.000114701
		2187.2	0.000115163
		2188.8	0.000115656
		2190.4	0.000116181
		2192	0.000116738
		2193.6	0.000117327
		2195.2	0.000117949
		2196.8	0.000118603
		2198.4	0.000119289
		2200	0.000120007
		2201.6	0.000120757
		2203.2	0.00012154
		2204.8	0.000122354
		2206.4	0.000123199
		2208	0.000124076
		2209.6	0.000124984
		2211.2	0.000125923
		2212.8	0.000126886
		2214.4	0.000127892
		2216	0.000128921
		2217.6	0.000129973
		2219.2	0.000131061
		2220.8	0.00013217
		2222.4	0.000133313
		2224	0.000134483
		2225.6	0.000135679
		2227.2	0.0001369
		2228.8	0.000138146
		2230.4	0.000139416
		2232	0.000140715
		2233.6	0.00014203
		2235.2	0.000143367
		2236.8	0.000144731
		2238.4	0.000146108
		2240	0.000147504
		2241.6	0.000148918
		2243.2	0.000150348
		2244.8	0.000151788
		2246.4	0.000153248
		2248	0.000154722
		2249.6	0.000156208
		2251.2	0.000157705
		2252.8	0.000159211
		2254.4	0.000160726
		2256	0.000162248
		2257.6	0.000163777
		2259.2	0.00016531
		2260.8	0.000166841
		2262.4	0.00016838
		2264	0.000169926
		2265.6	0.000171467
		2267.2	0.000172999
		2268.8	0.000174535
		2270.4	0.000176066
		2272	0.000177592
		2273.6	0.00017911
		2275.2	0.000180621
		2276.8	0.000182121
		2278.4	0.000183611
		2280	0.000185088
		2281.6	0.000186551
		2283.2	0.000187999
		2284.8	0.000189431
		2286.4	0.000190846
		2288	0.000192241
		2289.6	0.000193617
		2291.2	0.000194965
		2292.8	0.000196297
		2294.4	0.000197605
		2296	0.000198888
		2297.6	0.000200146
		2299.2	0.000201376
		2300.8	0.000202579
		2302.4	0.000203752
		2304	0.000204895
		2305.6	0.000206007
		2307.2	0.000207088
		2308.8	0.000208135
		2310.4	0.000209149
		2312	0.000210129
		2313.6	0.000211073
		2315.2	0.000211988
		2316.8	0.000212861
		2318.4	0.000213697
		2320	0.000214501
		2321.6	0.000215262
		2323.2	0.000215985
		2324.8	0.000216668
		2326.4	0.000217307
		2328	0.000217913
		2329.6	0.000218479
		2331.2	0.000219006
		2332.8	0.000219493
		2334.4	0.000219941
		2336	0.000220349
		2337.6	0.000220717
		2339.2	0.000221039
		2340.8	0.000221329
		2342.4	0.00022158
		2344	0.000221792
		2345.6	0.000221966
		2347.2	0.000222102
		2348.8	0.000222201
		2350.4	0.000222263
		2352	0.000222295
		2353.6	0.000222286
		2355.2	0.000222243
		2356.8	0.000222165
		2358.4	0.000222055
		2360	0.000221912
		2361.6	0.000221737
		2363.2	0.000221533
		2364.8	0.000221299
		2366.4	0.000221037
		2368	0.000220748
		2369.6	0.000220432
		2371.2	0.000220092
		2372.8	0.000219728
		2374.4	0.000219342
		2376	0.000218935
		2377.6	0.000218507
		2379.2	0.000218062
		2380.8	0.000217599
		2382.4	0.00021712
		2384	0.000216621
		2385.6	0.000216116
		2387.2	0.000215599
		2388.8	0.000215072
		2390.4	0.000214537
		2392	0.000213994
		2393.6	0.000213446
		2395.2	0.000212894
		2396.8	0.000212332
		2398.4	0.000211777
		2400	0.000211221
		2401.6	0.000210668
		2403.2	0.000210117
		2404.8	0.000209565
		2406.4	0.000209025
		2408	0.000208493
		2409.6	0.00020797
		2411.2	0.000207457
		2412.8	0.000206956
		2414.4	0.000206468
		2416	0.000205993
		2417.6	0.000205535
		2419.2	0.0002051
		2420.8	0.000204677
		2422.4	0.000204273
		2424	0.00020389
		2425.6	0.000203528
		2427.2	0.000203189
		2428.8	0.000202873
		2430.4	0.000202583
		2432	0.000202317
		2433.6	0.000202079
		2435.2	0.000201867
		2436.8	0.000201684
		2438.4	0.00020153
		2440	0.000201405
		2441.6	0.00020131
		2443.2	0.000201247
		2444.8	0.000201215
		2446.4	0.000201214
		2448	0.000201247
		2449.6	0.000201312
		2451.2	0.00020141
		2452.8	0.000201541
		2454.4	0.000201707
		2456	0.000201906
		2457.6	0.000202139
		2459.2	0.000202406
		2460.8	0.000202708
		2462.4	0.000203043
		2464	0.000203413
		2465.6	0.000203816
		2467.2	0.000204253
		2468.8	0.000204723
		2470.4	0.000205227
		2472	0.000205763
		2473.6	0.000206332
		2475.2	0.000206933
		2476.8	0.000207565
		2478.4	0.000208229
		2480	0.000208922
		2481.6	0.000209646
		2483.2	0.000210398
		2484.8	0.00021118
		2486.4	0.000211988
		2488	0.000212824
		2489.6	0.000213686
		2491.2	0.000214573
		2492.8	0.000215484
		2494.4	0.000216418
		2496	0.000217375
		2497.6	0.000218354
		2499.2	0.000219353
		2500.8	0.000220371
		2502.4	0.000221407
		2504	0.000222461
		2505.6	0.000223531
		2507.2	0.000224615
		2508.8	0.000225714
		2510.4	0.000226824
		2512	0.000227947
		2513.6	0.000229079
		2515.2	0.00023022
		2516.8	0.000231369
		2518.4	0.000232524
		2520	0.000233679
		2521.6	0.000234843
		2523.2	0.00023601
		2524.8	0.000237179
		2526.4	0.000238347
		2528	0.000239514
		2529.6	0.000240679
		2531.2	0.00024184
		2532.8	0.000242995
		2534.4	0.000244144
		2536	0.000245286
		2537.6	0.000246425
		2539.2	0.000247548
		2540.8	0.00024866
		2542.4	0.000249759
		2544	0.000250844
		2545.6	0.000251915
		2547.2	0.000252969
		2548.8	0.000254006
		2550.4	0.000255024
		2552	0.000256023
		2553.6	0.000257002
		2555.2	0.000257958
		2556.8	0.000258892
		2558.4	0.000259801
		2560	0.000260686
		2561.6	0.000261545
		2563.2	0.000262378
		2564.8	0.000263182
		2566.4	0.000263958
		2568	0.000264705
		2569.6	0.000265421
		2571.2	0.000266106
		2572.8	0.000266759
		2574.4	0.000267374
		2576	0.000267961
		2577.6	0.000268515
		2579.2	0.000269034
		2580.8	0.000269517
		2582.4	0.000269965
		2584	0.000270376
		2585.6	0.00027075
		2587.2	0.000271087
		2588.8	0.000271386
		2590.4	0.000271641
		2592	0.000271864
		2593.6	0.000272048
		2595.2	0.000272193
		2596.8	0.000272299
		2598.4	0.000272365
		2600	0.000272391
		2601.6	0.000272377
		2603.2	0.000272323
		2604.8	0.000272229
		2606.4	0.000272095
		2608	0.000271921
		2609.6	0.000271706
		2611.2	0.000271452
		2612.8	0.000271158
		2614.4	0.000270825
		2616	0.000270452
		2617.6	0.000270039
		2619.2	0.000269588
		2620.8	0.000269098
		2622.4	0.00026857
		2624	0.000268003
		2625.6	0.000267399
		2627.2	0.000266758
		2628.8	0.00026608
		2630.4	0.000265366
		2632	0.000264616
		2633.6	0.000263831
		2635.2	0.000263011
		2636.8	0.000262157
		2638.4	0.000261269
		2640	0.000260349
		2641.6	0.000259397
		2643.2	0.000258413
		2644.8	0.000257398
		2646.4	0.000256347
		2648	0.000255267
		2649.6	0.000254159
		2651.2	0.00025303
		2652.8	0.000251874
		2654.4	0.000250691
		2656	0.000249484
		2657.6	0.000248251
		2659.2	0.000246995
		2660.8	0.000245716
		2662.4	0.000244415
		2664	0.000243093
		2665.6	0.000241751
		2667.2	0.00024039
		2668.8	0.00023901
		2670.4	0.000237613
		2672	0.000236199
		2673.6	0.000234769
		2675.2	0.000233325
		2676.8	0.000231867
		2678.4	0.000230397
		2680	0.000228914
		2681.6	0.000227414
		2683.2	0.000225911
		2684.8	0.000224398
		2686.4	0.000222877
		2688	0.000221349
		2689.6	0.000219814
		2691.2	0.000218273
		2692.8	0.000216727
		2694.4	0.000215178
		2696	0.000213625
		2697.6	0.00021207
		2699.2	0.000210514
		2700.8	0.000208956
		2702.4	0.000207399
		2704	0.000205843
		2705.6	0.000204288
		2707.2	0.000202735
		2708.8	0.000201186
		2710.4	0.00019964
		2712	0.000198099
		2713.6	0.000196562
		2715.2	0.000195031
		2716.8	0.000193506
		2718.4	0.000191988
		2720	0.000190478
		2721.6	0.000188975
		2723.2	0.00018748
		2724.8	0.000185994
		2726.4	0.000184518
		2728	0.000183051
		2729.6	0.000181594
		2731.2	0.000180147
		2732.8	0.000178711
		2734.4	0.000177286
		2736	0.000175872
		2737.6	0.00017447
		2739.2	0.000173079
		2740.8	0.0001717
		2742.4	0.000170333
		2744	0.000168978
		2745.6	0.000167636
		2747.2	0.000166305
		2748.8	0.000164987
		2750.4	0.000163681
		2752	0.000162387
		2753.6	0.000161105
		2755.2	0.000159835
		2756.8	0.000158577
		2758.4	0.000157331
		2760	0.000156091
		2761.6	0.000154868
		2763.2	0.000153656
		2764.8	0.000152455
		2766.4	0.000151265
		2768	0.000150085
		2769.6	0.000148915
		2771.2	0.000147755
		2772.8	0.000146604
		2774.4	0.000145462
		2776	0.000144323
		2777.6	0.000143198
		2779.2	0.000142081
		2780.8	0.000140972
		2782.4	0.000139869
		2784	0.000138772
		2785.6	0.000137675
		2787.2	0.00013659
		2788.8	0.000135511
		2790.4	0.000134435
		2792	0.000133364
		2793.6	0.000132296
		2795.2	0.000131231
		2796.8	0.000130169
		2798.4	0.000129109
		2800	0.000128051
		2801.6	0.000126994
		2803.2	0.000125937
		2804.8	0.000124881
		2806.4	0.000123825
		2808	0.000122768
		2809.6	0.00012171
		2811.2	0.000120651
		2812.8	0.00011959
		2814.4	0.000118527
		2816	0.000117462
		2817.6	0.000116394
		2819.2	0.000115323
		2820.8	0.000114248
		2822.4	0.000113164
		2824	0.000112082
		2825.6	0.000110997
		2827.2	0.000109907
		2828.8	0.000108813
		2830.4	0.000107714
		2832	0.000106605
		2833.6	0.000105497
		2835.2	0.000104384
		2836.8	0.000103267
		2838.4	0.000102145
		2840	0.000101018
		2841.6	9.98857e-05
		2843.2	9.8749e-05
		2844.8	9.76077e-05
		2846.4	9.64619e-05
		2848	9.53117e-05
		2849.6	9.41574e-05
		2851.2	9.2999e-05
		2852.8	9.18368e-05
		2854.4	9.06711e-05
		2856	8.9502e-05
		2857.6	8.833e-05
		2859.2	8.71552e-05
		2860.8	8.59781e-05
		2862.4	8.47989e-05
		2864	8.36179e-05
		2865.6	8.24357e-05
		2867.2	8.12524e-05
		2868.8	8.00686e-05
		2870.4	7.88785e-05
		2872	7.76953e-05
		2873.6	7.65128e-05
		2875.2	7.53313e-05
		2876.8	7.41514e-05
		2878.4	7.29735e-05
		2880	7.1798e-05
		2881.6	7.06254e-05
		2883.2	6.94561e-05
		2884.8	6.82907e-05
		2886.4	6.71295e-05
		2888	6.59731e-05
		2889.6	6.48219e-05
		2891.2	6.36764e-05
		2892.8	6.2537e-05
		2894.4	6.14042e-05
		2896	6.02783e-05
		2897.6	5.91599e-05
		2899.2	5.80494e-05
		2900.8	5.69471e-05
		2902.4	5.58535e-05
		2904	5.47628e-05
		2905.6	5.36883e-05
		2907.2	5.26235e-05
		2908.8	5.15689e-05
		2910.4	5.05248e-05
		2912	4.94915e-05
		2913.6	4.84693e-05
		2915.2	4.74586e-05
		2916.8	4.64595e-05
		2918.4	4.54725e-05
		2920	4.44977e-05
		2921.6	4.35353e-05
		2923.2	4.25857e-05
		2924.8	4.16489e-05
		2926.4	4.07253e-05
		2928	3.98149e-05
		2929.6	3.8918e-05
		2931.2	3.80346e-05
		2932.8	3.71585e-05
		2934.4	3.63032e-05
		2936	3.54616e-05
		2937.6	3.4634e-05
		2939.2	3.38203e-05
		2940.8	3.30206e-05
		2942.4	3.2235e-05
		2944	3.14634e-05
		2945.6	3.06996e-05
		2947.2	2.99565e-05
		2948.8	2.92274e-05
		2950.4	2.85122e-05
		2952	2.7811e-05
		2953.6	2.71237e-05
		2955.2	2.64501e-05
		2956.8	2.57902e-05
		2958.4	2.51439e-05
		2960	2.4511e-05
		2961.6	2.38916e-05
		2963.2	2.32854e-05
		2964.8	2.26924e-05
		2966.4	2.21123e-05
		2968	2.1545e-05
		2969.6	2.09904e-05
		2971.2	2.04484e-05
		2972.8	1.99186e-05
		2974.4	1.94011e-05
		2976	1.88955e-05
		2977.6	1.84018e-05
		2979.2	1.79197e-05
		2980.8	1.74491e-05
		2982.4	1.69834e-05
		2984	1.65355e-05
		2985.6	1.60984e-05
		2987.2	1.5672e-05
		2988.8	1.5256e-05
		2990.4	1.48502e-05
		2992	1.44545e-05
		2993.6	1.40686e-05
		2995.2	1.36924e-05
		2996.8	1.33256e-05
		2998.4	1.29681e-05
		3000	1.26196e-05
		3001.6	1.22741e-05
		3003.2	1.19437e-05
		3004.8	1.16216e-05
		3006.4	1.13078e-05
		3008	1.10021e-05
		3009.6	1.07042e-05
		3011.2	1.0414e-05
		3012.8	1.01313e-05
		3014.4	9.8559e-06
		3016	9.58765e-06
		3017.6	9.32637e-06
		3019.2	9.07189e-06
		3020.8	8.82406e-06
		3022.4	8.58269e-06
		3024	8.34763e-06
		3025.6	8.11873e-06
		3027.2	7.89583e-06
		3028.8	7.67253e-06
		3030.4	7.46152e-06
		3032	7.25604e-06
		3033.6	7.05596e-06
		3035.2	6.86114e-06
		3036.8	6.67144e-06
		3038.4	6.48674e-06
		3040	6.30689e-06
		3041.6	6.13178e-06
		3043.2	5.96129e-06
		3044.8	5.79529e-06
		3046.4	5.63367e-06
		3048	5.47632e-06
		3049.6	5.32312e-06
		3051.2	5.17396e-06
		3052.8	5.02875e-06
		3054.4	4.88739e-06
		3056	4.74976e-06
		3057.6	4.61577e-06
		3059.2	4.48534e-06
		3060.8	4.3521e-06
		3062.4	4.22885e-06
		3064	4.10886e-06
		3065.6	3.99205e-06
		3067.2	3.87835e-06
		3068.8	3.76766e-06
		3070.4	3.65991e-06
		3072	3.55503e-06
		3073.6	3.45294e-06
		3075.2	3.35358e-06
		3076.8	3.25687e-06
		3078.4	3.16275e-06
		3080	3.07115e-06
		3081.6	2.982e-06
		3083.2	2.89525e-06
		3084.8	2.81084e-06
		3086.4	2.7287e-06
		3088	2.64878e-06
		3089.6	2.57102e-06
		3091.2	2.49537e-06
		3092.8	2.42178e-06
		3094.4	2.35018e-06
		3096	2.28054e-06
		3097.6	2.21281e-06
		3099.2	2.14692e-06
		3100.8	2.08285e-06
		3102.4	2.02054e-06
		3104	1.95995e-06
		3105.6	1.90103e-06
		3107.2	1.84375e-06
		3108.8	1.78805e-06
		3110.4	1.73391e-06
		3112	1.68128e-06
		3113.6	1.63013e-06
		3115.2	1.58041e-06
		3116.8	1.52631e-06
		3118.4	1.47988e-06
		3120	1.43474e-06
		3121.6	1.39085e-06
		3123.2	1.34817e-06
		3124.8	1.3067e-06
		3126.4	1.26638e-06
		3128	1.22721e-06
		3129.6	1.18914e-06
		3131.2	1.15215e-06
		3132.8	1.11621e-06
		3134.4	1.08131e-06
		3136	1.04741e-06
		3137.6	1.01448e-06
		3139.2	9.82506e-07
		3140.8	9.5146e-07
		3142.4	9.2132e-07
		3144	8.9206e-07
		3145.6	8.6366e-07
		3147.2	8.36095e-07
		3148.8	8.09344e-07
		3150.4	7.83387e-07
		3152	7.58201e-07
		3153.6	7.33767e-07
		3155.2	7.10064e-07
		3156.8	6.87073e-07
		3158.4	6.64774e-07
		3160	6.43149e-07
		3161.6	6.2218e-07
		3163.2	6.01848e-07
		3164.8	5.82136e-07
		3166.4	5.63028e-07
		3168	5.44505e-07
		3169.6	5.26552e-07
		3171.2	5.09153e-07
		3172.8	4.92293e-07
		3174.4	4.75956e-07
		3176	4.60127e-07
		3177.6	4.44792e-07
		3179.2	4.29937e-07
		3180.8	4.15549e-07
		3182.4	4.01612e-07
		3184	3.88116e-07
		3185.6	3.75046e-07
		3187.2	3.62391e-07
		3188.8	3.50138e-07
		3190.4	3.38276e-07
		3192	3.26793e-07
		3193.6	3.15677e-07
		3195.2	3.04919e-07
		3196.8	2.94506e-07
		3198.4	2.8443e-07
[truncated: 1 more rows]

## Sheet: PlotDat6
Source sheet	ZirconData	0.3	145.521	1	91.0371	3.35216
Plot name	Average6	1335.7	145.521	2	95.9919	3.34962
Plot Type	15			3	96.8652	2.56742
1st free col	8			4	97.4072	2.41842
Sigma Level	2			5	97.4807	3.21096
Absolute Errs	TRUE			6	97.7982	3.20324
Symbol Type	1			7	98.0813	3.05108
Inverse Plot	FALSE			8	98.115	1.66778
Color Plot	TRUE			9	98.16	3.03995
3D plot	FALSE			10	98.2386	2.37676
Linear	FALSE			11	98.3732	2.8903
Data Range	AA2:AB1336			12	98.4526	2.45231
Filled Symbols	FALSE			13	98.5277	2.29984
ConcAge	FALSE			14	98.5287	2.82952
ConcSwap	FALSE			15	98.5664	2.38666
1st Symbol-row	1			16	98.6911	2.76742
				17	98.8139	1.881
				18	98.9159	3.84998
				19	99.1307	3.28752
				20	99.1626	1.99847
				21	99.2302	3.13345
				22	99.2412	2.32585
				23	99.2627	2.84897
				24	99.3267	1.97502
				25	99.338	2.78694
				26	99.3577	3.05442
				27	99.3853	3.2017
				28	99.4929	2.71018
				29	99.5197	2.87317
				30	99.722	2.54198
				31	99.7259	2.91509
				32	99.7259	3.05889
				33	99.7851	3.09156
				34	99.799	1.77971
				35	99.8179	3.36241
				36	99.8547	2.95092
				37	99.861	1.93675
				38	99.91	3.44161
				39	99.9727	2.11305
				40	99.9978	1.88927
				41	100.042	2.93237
				42	100.06	2.36483
				43	100.062	2.23312
				44	100.085	1.73115
				45	100.122	3.03426
				46	100.14	2.16272
				47	100.15	2.23964
				48	100.186	3.4445
				49	100.268	2.23036
				50	100.276	3.40242
				51	100.347	2.26008
				52	100.436	3.4254
				53	100.467	2.61711
				54	100.479	2.39541
				55	100.484	2.67982
				56	100.616	2.2564
				57	100.628	2.55707
				58	100.646	3.07012
				59	100.731	2.75011
				60	100.747	1.73613
				61	100.77	2.61222
				62	100.872	2.60698
				63	100.884	2.2275
				64	100.981	2.44946
				65	100.992	1.88036
				66	101.033	2.85946
				67	101.05	1.85354
				68	101.075	2.0468
				69	101.17	2.5052
				70	101.197	2.97057
				71	101.197	3.15025
				72	101.289	4.02331
				73	101.297	2.92179
				74	101.301	2.1968
				75	101.342	2.3907
				76	101.395	1.69604
				77	101.405	2.31813
				78	101.44	2.70694
				79	101.473	3.38038
				80	101.494	2.92472
				81	101.494	3.14611
				82	101.52	3.61865
				83	101.531	2.10749
				84	101.535	2.67848
				85	101.569	1.68028
				86	101.57	3.35086
				87	101.576	1.90068
				88	101.585	2.39818
				89	101.609	2.56583
				90	101.627	2.56493
				91	101.64	3.26378
				92	101.673	2.61677
				93	101.697	3.15962
				94	101.719	3.58439
				95	101.729	3.2198
				96	101.731	1.95765
				97	101.748	2.39507
				98	101.749	4.88472
				99	101.749	3.53954
				100	101.794	3.40306
				101	101.797	2.76995
				102	101.8	2.59474
				103	101.839	3.33834
				104	101.845	2.85472
				105	101.855	2.73592
				106	101.879	2.22054
				107	101.882	2.51091
				108	101.914	2.31918
				109	101.94	2.27614
				110	101.956	2.50902
				111	102	2.14395
				112	102.023	3.1289
				113	102.024	3.30989
				114	102.024	3.38641
				115	102.025	2.68807
				116	102.042	3.09964
				117	102.057	3.04203
				118	102.059	3.22057
				119	102.104	1.92333
				120	102.104	2.3996
				121	102.114	3.21873
				122	102.157	2.05136
				123	102.205	2.97763
				124	102.208	3.31197
				125	102.215	1.63497
				126	102.232	2.33631
				127	102.251	1.89785
				128	102.264	2.05187
				129	102.267	2.17289
				130	102.272	2.99375
				131	102.294	2.74385
				132	102.3	3.23765
				133	102.31	3.05144
				134	102.32	2.80189
				135	102.394	2.38548
				136	102.491	2.16229
				137	102.505	3.21948
				138	102.508	1.60009
				139	102.546	2.06218
				140	102.568	2.57711
				141	102.575	4.54247
				142	102.594	3.49361
				143	102.6	2.63287
				144	102.616	2.92932
				145	102.637	2.75473
				146	102.667	3.04279
				147	102.717	2.98631
				148	102.728	2.28735
				149	102.768	2.3416
				150	102.779	2.11358
				151	102.805	2.68822
				152	102.809	2.63316
				153	102.815	2.92323
				154	102.818	1.53977
				155	102.825	1.83912
				156	102.835	2.33584
				157	102.837	3.04672
				158	102.848	2.92272
				159	102.853	3.32794
				160	102.856	2.86156
				161	102.857	3.04457
				162	102.878	2.63517
				163	102.925	2.22253
				164	102.959	1.74693
				165	102.96	2.24103
				166	102.981	2.80442
				167	102.989	3.66851
				168	103.015	4.88982
				169	103.049	3.12921
				170	103.095	2.78408
				171	103.102	3.4706
				172	103.117	3.10202
				173	103.129	2.44549
				174	103.148	3.51733
				175	103.168	2.57302
				176	103.21	2.39229
				177	103.217	3.10185
				178	103.272	2.51628
				179	103.363	2.86566
				180	103.391	3.7074
				181	103.416	3.35324
				182	103.436	3.16555
				183	103.458	2.69555
				184	103.489	3.51782
				185	103.493	3.55765
				186	103.504	3.46858
				187	103.553	4.26102
				188	103.58	2.80358
				189	103.616	3.6876
				190	103.62	2.99094
				191	103.648	4.09639
				192	103.672	2.92579
				193	103.675	2.80695
				194	103.711	3.61972
				195	103.723	1.79118
				196	103.74	3.33321
				197	103.764	2.74148
				198	103.77	3.64853
				199	103.796	3.1031
				200	103.932	2.34685
				201	103.951	2.39879
				202	103.982	2.491
				203	104.009	3.64016
				204	104.074	2.74829
				205	104.079	2.17336
				206	104.102	2.34122
				207	104.112	2.62327
				208	104.181	2.46546
				209	104.219	2.23513
				210	104.257	4.85578
				211	104.297	3.05033
				212	104.381	3.46527
				213	104.4	2.69302
				214	104.409	4.30084
				215	104.434	3.28713
				216	104.445	1.74396
				217	104.481	2.92594
				218	104.551	2.5081
				219	104.572	4.58734
				220	104.662	3.09902
				221	104.677	2.31779
				222	104.75	3.32152
				223	104.76	3.05221
				224	104.783	2.52012
				225	104.805	3.10244
				226	104.833	3.46611
				227	104.838	2.48237
				228	104.872	1.85501
				229	104.877	2.45781
				230	104.894	3.15167
				231	104.899	3.5329
				232	104.921	3.31226
				233	104.999	3.22967
				234	105.053	3.17036
				235	105.074	3.25049
				236	105.108	3.43504
				237	105.223	3.05825
				238	105.271	3.15861
				239	105.325	3.27331
				240	105.416	3.81529
				241	105.68	3.60231
				242	105.789	3.35534
				243	105.948	2.67885
				244	105.954	2.71634
				245	106.125	2.98955
				246	106.162	3.71101
				247	106.181	2.22146
				248	106.309	2.2909
				249	106.458	2.587
				250	106.904	1.8614
				251	106.977	3.02584
				252	107.21	3.25165
				253	107.279	3.24249
				254	107.318	7.49001
				255	107.335	2.64696
				256	107.467	3.2524
				257	107.702	3.52572
				258	107.773	3.47809
				259	107.908	4.28467
				260	108.063	3.31276
				261	108.173	6.15007
				262	108.576	2.99338
				263	108.689	3.24291
				264	108.978	4.70353
				265	108.98	3.77155
				266	109.034	3.88952
				267	109.18	1.92452
				268	109.234	2.21778
				269	109.253	3.3207
				270	109.51	1.92644
				271	109.704	2.47773
				272	109.982	3.25808
				273	110.414	2.67587
				274	110.436	2.3924
				275	110.638	2.76632
				276	111.53	3.72075
				277	111.763	3.41309
				278	111.83	2.93962
				279	112.765	2.43407
				280	113.018	3.61478
				281	114.9	3.91015
				282	115.558	4.58025
				283	115.769	2.50734
				284	117.064	2.51001
				285	117.416	3.14355
				286	119.033	4.41499
				287	119.793	3.50672
				288	119.956	3.25521
				289	120.948	3.67958
				290	121.128	3.9023
				291	121.939	3.62041
				292	122.029	3.6927
				293	122.119	3.41642
				294	122.209	3.69489
				295	122.389	3.69709
				296	122.389	3.69709
				297	122.569	3.55845
				298	122.569	3.62829
				299	122.839	3.63167
				300	122.839	3.29582
				301	123.019	4.15072
				302	123.109	3.85074
				303	123.199	3.63619
				304	123.199	4.00047
				305	123.199	3.63619
				306	123.379	3.78103
				307	123.558	4.08001
				308	123.579	3.6937
				309	123.648	3.85703
				310	124.188	3.79072
				311	124.637	3.72468
				312	124.637	3.79613
				313	125.175	3.94826
				314	125.624	3.73691
				315	125.714	3.88131
				316	125.91	3.13978
				317	126.7	3.893
				318	127.059	3.61675
				319	127.686	4.2005
				320	127.774	3.77081
				321	127.865	3.97942
				322	128.312	4.20729
				323	128.491	3.91441
				324	128.76	3.63918
				325	129.654	4.07337
				326	130.1	4.00569
				327	130.636	3.94032
				328	131.439	4.39248
				329	132.064	4.39908
				330	132.509	3.82395
				331	135.617	3.55873
				332	137.037	2.54423
				333	137.948	2.48106
				334	139.112	6.03464
				335	139.525	5.01569
				336	139.525	4.33334
				337	139.702	4.3354
				338	139.791	4.86203
				339	140.852	5.10687
				340	141.029	5.18769
				341	141.824	4.14872
				342	145.171	3.47921
				343	145.725	2.96115
				344	145.789	4.40722
				345	145.86	3.87357
				346	145.992	3.48259
				347	146.052	13.284
				348	146.159	3.87811
				349	146.287	3.19519
				350	146.361	3.13732
				351	146.895	3.48327
				352	147.108	4.21591
				353	147.284	4.56774
				354	147.48	3.26258
				355	147.547	4.71645
				356	147.606	2.81913
				357	147.723	5.32779
				358	147.972	4.19863
				359	147.984	2.51049
				360	148.074	4.94586
				361	148.13	2.35083
				362	148.181	2.82228
				363	148.202	2.86262
				364	148.235	3.38248
				365	148.249	5.73058
				366	148.249	4.50747
				367	148.265	2.82377
				368	148.265	3.32129
				369	148.267	3.43557
				370	148.271	2.82047
				371	148.337	4.72521
				372	148.428	3.31834
				373	148.434	2.82521
				374	148.626	2.56673
				375	148.627	2.82513
				376	148.661	3.56332
				377	148.665	3.37635
				378	148.682	2.56626
				379	148.796	3.20981
				380	148.893	3.21
				381	149.039	4.88092
				382	149.041	2.26558
				383	149.126	5.73782
				384	149.202	3.43829
				385	149.214	4.4486
				386	149.27	3.96228
				387	149.296	6.00599
				388	149.334	3.72237
				389	149.389	4.66418
				390	149.389	4.73694
				391	149.392	4.4151
				392	149.47	3.50016
				393	149.477	4.45181
				394	149.511	3.78264
				395	149.515	2.94391
				396	149.521	2.89536
				397	149.578	3.04435
				398	149.631	2.32746
				399	149.643	2.93734
				400	149.652	4.31623
				401	149.652	4.05306
				402	149.666	4.13292
				403	149.674	3.38748
				404	149.679	2.57676
				405	149.789	4.07938
				406	149.827	5.98663
				407	149.878	3.04456
				408	149.915	4.59834
				409	150.003	5.19405
				410	150.055	4.02429
				411	150.063	3.61538
				412	150.172	2.78045
				413	150.283	3.49751
				414	150.353	4.39337
				415	150.373	3.56436
				416	150.441	4.53361
				417	150.546	2.27699
				418	150.547	2.62378
				419	150.557	3.05158
				420	150.574	2.88975
				421	150.662	2.78208
				422	150.791	5.04949
				423	150.892	3.38922
				424	150.917	3.16458
				425	150.966	4.97611
				426	150.981	3.27878
				427	151.022	2.67724
				428	151.05	6.34319
				429	151.079	4.14084
				430	151.082	3.61313
				431	151.138	3.40096
				432	151.205	3.91227
				433	151.282	3.28684
				434	151.301	3.7172
				435	151.361	3.44572
				436	151.435	3.85046
				437	151.475	3.22394
				438	151.476	3.16391
				439	151.485	3.97475
				440	151.491	4.98166
				441	151.491	4.98166
				442	151.495	2.78522
				443	151.565	3.27558
				444	151.666	4.40984
				445	151.715	3.79301
				446	151.724	5.73276
				447	151.79	3.38872
				448	151.883	3.73812
				449	151.888	4.20275
				450	152.015	5.29066
				451	152.045	2.9033
				452	152.089	3.67493
				453	152.19	4.62513
				454	152.281	2.94584
				455	152.37	3.32893
				456	152.408	4.49222
				457	152.426	3.50752
				458	152.431	3.40241
				459	152.503	3.28021
				460	152.505	3.75095
				461	152.888	3.80777
				462	152.928	3.51141
				463	152.976	4.85003
				464	153.037	2.532
				465	153.151	5.37878
				466	153.155	2.63502
				467	153.214	3.74248
				468	153.238	5.00024
				469	153.256	4.88105
				470	153.295	4.26649
				471	153.383	3.62859
				472	153.5	4.43302
				473	153.513	3.12239
				474	153.514	3.44617
				475	153.588	4.78437
				476	153.642	3.02
				477	153.675	4.71367
				478	153.691	3.85804
				479	153.711	3.39755
				480	153.797	4.38145
				481	153.803	3.4022
				482	153.817	4.22497
				483	154.022	4.03574
				484	154.286	4.93772
				485	154.46	5.23835
				486	154.596	2.90587
				487	154.623	3.06941
				488	154.635	4.7249
				489	154.734	4.21759
				490	154.8	2.74815
				491	154.925	4.32995
				492	155.002	3.7988
				493	155.006	3.68815
				494	155.064	3.29636
				495	155.07	4.87349
				496	155.219	3.14196
				497	155.25	3.069
				498	155.288	3.57843
				499	155.321	2.80536
				500	155.332	5.0969
				501	155.332	4.87644
				502	155.418	4.86021
				503	155.64	4.2738
				504	155.68	4.88037
				505	155.767	4.39515
				506	156.116	8.74828
				507	156.203	4.95887
				508	156.29	6.77529
				509	156.462	3.9242
				510	156.551	4.81847
				511	156.598	2.92577
				512	156.725	5.03784
				513	156.992	3.8678
				514	157.247	5.11726
				515	157.266	2.99681
				516	157.4	5.58042
				517	157.421	4.75779
				518	157.769	4.04695
				519	157.867	3.08538
				520	158.029	6.95337
				521	158.236	3.03722
				522	158.245	3.52204
				523	158.357	3.20093
				524	158.551	3.03649
				525	158.638	4.98604
				526	158.985	5.51185
				527	159.019	3.20328
				528	159.159	5.2863
				529	159.239	2.66936
				530	159.364	2.57292
				531	159.447	3.42495
				532	159.59	3.31484
				533	159.593	5.74951
				534	159.593	4.92501
				535	159.679	4.855
				536	159.679	5.07024
				537	159.766	4.85602
				538	159.766	5.67337
				539	159.792	3.5942
				540	159.831	9.14628
				541	159.853	5.14529
				542	160.113	4.65225
				543	160.2	5.92529
				544	160.2	4.79103
				545	160.373	5.07792
				546	160.547	4.86522
				547	160.547	4.79521
				548	160.844	2.73425
				549	160.893	9.02659
				550	160.984	4.46791
				551	160.987	3.19729
				552	161.039	4.34094
				553	161.117	3.31028
				554	161.153	5.6094
				555	161.326	4.60025
				556	161.326	5.01643
				557	161.409	5.83351
				558	161.413	4.94607
				559	161.568	3.33642
				560	161.586	5.01939
				561	161.623	3.07415
				562	161.673	4.34591
				563	161.673	4.80882
				564	161.742	3.60611
				565	161.759	5.02136
				566	161.846	4.74205
				567	161.979	3.34523
				568	162.045	3.12343
				569	162.07	3.18146
				570	162.106	4.61027
				571	162.192	4.61139
				572	162.192	5.31793
				573	162.232	3.23413
				574	162.248	3.15893
				575	162.279	5.31884
				576	162.279	5.09916
				577	162.279	4.67951
				578	162.365	4.95716
				579	162.452	4.81828
				580	162.452	5.39511
				581	162.452	4.74955
				582	162.516	2.85096
				583	162.538	4.75063
				584	162.625	4.96019
				585	162.679	3.09227
				586	162.696	2.84988
				587	162.711	4.48718
				588	162.711	4.89092
				589	162.711	4.55214
				590	162.798	4.68608
				591	163.043	3.226
				592	163.127	3.43938
				593	163.144	4.89608
				594	163.144	4.89608
				595	163.23	4.96727
				596	163.349	3.69608
				597	163.356	3.05385
				598	163.358	3.8227
				599	163.403	6.09712
				600	163.625	3.72187
				601	163.663	5.25988
				602	163.663	6.49898
				603	163.749	4.63152
				604	163.749	4.90333
				605	163.829	3.18242
				606	163.835	4.63264
				607	163.835	4.63264
				608	163.835	4.43865
				609	163.904	3.95322
				610	163.922	7.07423
				611	164.095	4.97742
				612	164.095	5.41211
				613	164.109	3.7347
				614	164.137	3.21606
				615	164.164	3.93814
				616	164.181	5.41301
				617	164.267	4.97945
				618	164.287	4.29924
				619	164.313	6.9927
				620	164.354	6.66636
				621	164.43	4.52718
				622	164.44	5.19556
				623	164.57	2.65763
				624	164.596	6.32103
				625	164.613	6.99604
				626	164.678	3.33423
				627	164.699	4.71026
				628	164.746	3.48146
				629	164.85	3.26438
				630	164.872	5.273
				631	164.93	3.24832
				632	164.958	5.87626
				633	165.131	5.06011
				634	165.15	3.22216
				635	165.166	3.20651
				636	165.217	6.4305
				637	165.315	3.36441
				638	165.324	3.44206
				639	165.353	3.21466
				640	165.476	4.85528
				641	165.562	6.19445
				642	165.591	4.82999
				643	165.614	3.32005
				644	165.632	3.49216
				645	165.648	5.88262
				646	165.715	3.14567
				647	165.807	2.41987
				648	165.821	4.85954
				649	165.845	3.88436
				650	165.876	3.77001
				651	165.88	3.53418
				652	165.907	5.28429
				653	165.907	5.21188
				654	165.924	2.70586
				655	166.079	4.53269
				656	166.163	3.29037
				657	166.166	4.28833
				658	166.186	3.88029
				659	166.215	3.96711
				660	166.252	5.21573
				661	166.281	3.77096
				662	166.304	4.21205
				663	166.338	4.73126
				664	166.458	3.31515
				665	166.551	3.92038
				666	166.597	4.73458
				667	166.683	4.73569
				668	166.696	4.46847
				669	166.728	3.24738
				670	166.764	3.68974
				671	166.769	5.29374
				672	166.855	4.87232
				673	166.886	3.71908
				674	166.896	3.22591
				675	166.932	3.2847
				676	166.941	4.48157
				677	166.941	4.67319
				678	166.997	4.11841
				679	167.027	5.97261
				680	167.027	5.01215
				681	167.029	2.51987
				682	167.032	7.094
				683	167.114	5.08318
				684	167.261	3.7893
				685	167.271	3.31293
				686	167.286	4.94605
				687	167.305	3.68401
				688	167.441	3.08003
				689	167.458	4.8123
				690	167.458	4.61523
				691	167.481	4.05622
				692	167.621	3.50129
				693	167.649	5.54149
				694	167.716	5.52403
				695	167.73	3.58458
				696	167.733	3.4919
				697	167.876	3.82878
				698	167.888	4.95339
				699	167.975	4.49595
				700	168.061	4.75347
				701	168.149	4.031
				702	168.233	5.16679
				703	168.361	3.99102
				704	168.401	3.30435
				705	168.405	4.62794
				706	168.405	5.16877
				707	168.594	2.67365
				708	168.632	3.63856
				709	168.663	5.10136
				710	168.74	3.9619
				711	168.749	4.96391
				712	168.822	3.45126
				713	168.835	4.82979
				714	168.97	3.77844
				715	169.012	7.76692
				716	169.093	6.0688
				717	169.093	5.46477
				718	169.265	4.83526
				719	169.28	6.14672
				720	169.522	4.90555
				721	169.55	3.03532
				722	169.862	3.74529
				723	169.866	5.32802
				724	169.957	3.40124
				725	170.038	5.25846
				726	170.038	5.25846
				727	170.19	4.24288
				728	170.198	3.40642
				729	170.295	5.19066
				730	170.553	4.78587
				731	170.553	4.85174
				732	170.568	3.64438
				733	170.589	4.46378
				734	170.639	5.12472
				735	170.725	4.78812
				736	170.804	2.68521
				737	170.806	9.39814
				738	170.822	3.6231
				739	170.896	5.26825
				740	170.963	3.36362
				741	170.982	5.19865
				742	170.982	6.39786
				743	171.325	5.13289
				744	171.325	4.86165
				745	171.497	5.78639
				746	171.497	5.06595
				747	171.668	5.20667
				748	171.675	3.55518
				749	171.754	5.138
				750	171.754	5.00094
				751	171.925	5.14004
				752	172.183	9.58455
				753	172.183	5.00626
				754	172.183	6.40796
				755	172.236	3.88195
				756	172.302	5.68792
				757	172.391	3.87197
				758	172.586	2.87973
				759	172.611	5.35884
				760	172.611	4.94448
				761	172.617	3.64871
				762	172.782	5.2899
				763	172.954	5.15235
				764	172.954	5.57913
				765	172.954	5.36271
				766	173.356	6.38176
				767	173.453	4.61303
				768	173.467	5.36853
				769	173.724	5.23083
				770	173.98	5.27639
				771	173.981	6.11357
				772	174.408	5.5947
				773	174.408	4.96735
				774	174.921	5.245
				775	175.016	3.55864
				776	175.092	5.04262
				777	175.092	5.60205
				778	175.349	7.89179
				779	175.434	9.07725
				780	175.69	5.25414
				781	176.288	4.79804
				782	176.459	4.86386
				783	176.544	5.83731
				784	176.917	2.58965
				785	177.056	5.33964
				786	177.482	11.7021
				787	177.567	5.8478
				788	177.738	5.21031
				789	177.822	3.50158
				790	177.823	5.14383
				791	177.994	5.28169
				792	178.334	5.85569
				793	178.334	6.15451
				794	178.344	3.72846
				795	178.42	6.07988
				796	178.42	5.85657
				797	178.76	7.01542
				798	178.845	5.57134
				799	179.016	5.02669
				800	179.186	12.5903
				801	179.356	6.08901
				802	180.037	11.7039
				803	180.037	10.8247
				804	180.377	6.17406
				805	180.459	5.77928
				806	180.547	6.2512
				807	180.783	3.39019
				808	181.057	5.25118
				809	181.311	7.03487
				810	182.33	5.68138
				811	182.415	6.42059
				812	182.585	10.8293
				813	182.754	5.01173
				814	183.009	5.90447
				815	183.433	7.45078
				816	183.433	5.48407
				817	183.856	6.28273
				818	184.026	7.21461
				819	184.47	3.51191
				820	185.887	5.79197
				821	186.141	5.7242
				822	186.31	5.45047
				823	186.428	3.66295
				824	186.479	5.72803
				825	189.348	9.98268
				826	189.716	3.85647
				827	189.854	5.36204
				828	190.19	5.63294
				829	190.527	8.14632
				830	191.789	6.21436
				831	191.873	14.3593
				832	192.217	4.02228
				833	192.377	8.32082
				834	192.536	3.65461
				835	193.133	5.80461
				836	193.469	6.59935
				837	195.121	4.10548
				838	195.732	5.69988
				839	196.153	3.73348
				840	198.204	4.21178
				841	198.944	3.79622
				842	198.993	5.6089
				843	199.076	6.50718
				844	199.336	5.8086
				845	199.491	3.73157
				846	199.827	5.23069
				847	199.841	4.42732
				848	199.909	4.10514
				849	199.91	6.15943
				850	200.036	5.52668
				851	200.16	6.44599
				852	200.244	7.26582
				853	200.494	6.09648
				854	200.494	6.02761
				855	200.661	6.37955
				856	200.822	4.45654
				857	200.827	7.50193
				858	200.911	6.10123
				859	200.994	6.74592
				860	201.244	6.82225
				861	201.41	6.03825
				862	201.743	6.04213
				863	201.91	5.84211
				864	202.08	4.71823
				865	202.155	5.38458
				866	202.168	5.18351
				867	202.18	5.04219
				868	202.205	5.64975
				869	202.482	5.90911
				870	202.575	6.39998
				871	202.659	6.61618
				872	202.825	6.47389
				873	202.825	5.85335
				874	203.074	6.26455
				875	203.119	5.58565
				876	203.157	6.40622
				877	203.241	6.54993
				878	203.26	4.65157
				879	203.294	4.14342
				880	203.407	6.91695
				881	203.483	3.86391
				882	203.652	3.73091
				883	203.724	6.61853
				884	203.822	5.99886
				885	203.888	4.53543
				886	203.989	5.24853
				887	204.154	6.00284
				888	204.313	5.11575
				889	204.388	6.2395
				890	204.487	6.07426
				891	204.505	6.30431
				892	204.506	3.79168
				893	204.57	7.07674
				894	204.57	7.76444
				895	204.57	6.35105
				896	204.653	6.49321
				897	204.673	3.89813
				898	204.763	5.20691
				899	204.775	6.1243
				900	204.79	6.46434
				901	204.81	5.01306
				902	204.985	6.35562
				903	204.985	7.00603
				904	205.151	9.70597
				905	205.399	6.15293
				906	205.482	6.78995
				907	205.565	6.29239
				908	205.606	6.28615
				909	205.797	6.18325
				910	205.829	4.49096
				911	206.166	4.90117
				912	206.239	4.27507
				913	206.397	5.13376
				914	206.414	4.60958
				915	206.421	3.9707
				916	206.435	4.16903
				917	206.56	6.72816
				918	206.734	4.7785
				919	206.837	5.82485
				920	206.891	6.87686
				921	206.894	4.05581
				922	206.974	6.37762
				923	207.02	4.0964
				924	207.057	7.17423
				925	207.058	5.67906
				926	207.072	3.93496
				927	207.172	4.57792
				928	207.251	4.17058
				929	207.314	5.76933
				930	207.336	5.03275
				931	207.385	6.47962
				932	207.418	6.5579
				933	207.436	5.5429
				934	207.453	5.42848
				935	207.471	7.78693
				936	207.578	7.80749
				937	207.582	4.01346
				938	207.636	6.59593
				939	207.698	4.29575
				940	207.733	4.1701
				941	207.796	4.06971
				942	207.842	4.43424
				943	207.87	4.40356
				944	207.886	3.96682
				945	207.904	3.97099
				946	207.937	4.50909
				947	207.947	4.24309
				948	207.978	3.95022
				949	207.996	4.63009
				950	208.011	4.22854
				951	208.094	6.31237
				952	208.143	6.18114
				953	208.145	4.29323
				954	208.194	3.96976
				955	208.251	5.55263
				956	208.287	3.9339
				957	208.325	6.8842
				958	208.384	4.12308
				959	208.417	4.04094
				960	208.487	4.05224
				961	208.679	4.5838
				962	208.742	4.09331
				963	208.778	4.16664
				964	208.782	4.76169
				965	208.79	4.0023
				966	208.81	5.77992
				967	208.835	3.9456
				968	208.961	4.24151
				969	208.984	3.94139
				970	209.042	4.60884
				971	209.044	5.30998
				972	209.048	4.62472
				973	209.093	6.07795
				974	209.096	4.01095
				975	209.125	6.19652
				976	209.161	4.23368
				977	209.373	6.19944
				978	209.373	6.13233
				979	209.41	7.21253
				980	209.452	4.61463
				981	209.51	4.21456
				982	209.526	4.33563
				983	209.678	3.97517
				984	209.678	4.1727
				985	209.682	5.72848
				986	209.787	4.17237
				987	209.791	4.17264
				988	209.81	5.4348
				989	209.834	4.24224
				990	209.907	4.12677
				991	209.998	5.60818
				992	210.02	4.94521
				993	210.057	4.50753
				994	210.086	5.03255
				995	210.105	4.9677
				996	210.128	4.20304
				997	210.223	6.33529
				998	210.256	4.73307
				999	210.281	7.96369
				1000	210.302	5.26336
				1001	210.351	6.3601
				1002	210.364	8.27694
				1003	210.381	4.07731
				1004	210.403	4.2781
				1005	210.408	4.14912
				1006	210.41	4.12697
				1007	210.554	4.04143
				1008	210.554	4.07206
				1009	210.611	6.34964
				1010	210.643	3.99757
				1011	210.7	4.34653
				1012	210.721	4.24198
				1013	210.847	3.99211
				1014	210.859	6.55997
				1015	210.898	4.37939
				1016	210.915	4.14189
				1017	210.983	4.58713
				1018	211.023	4.29046
				1019	211.024	6.49208
				1020	211.051	4.08952
				1021	211.165	4.67316
				1022	211.169	5.76916
				1023	211.271	6.99279
				1024	211.315	3.98182
				1025	211.328	4.36056
				1026	211.354	6.15616
				1027	211.416	4.36273
				1028	211.442	4.83158
				1029	211.443	5.84905
				1030	211.479	4.00694
				1031	211.498	3.9281
				1032	211.541	3.89781
				1033	211.584	4.07035
				1034	211.703	4.50541
				1035	211.766	9.32699
				1036	211.838	4.36693
				1037	211.848	14.3374
				1038	211.862	4.38163
				1039	211.931	6.50216
				1040	211.939	4.98497
				1041	211.949	4.3696
				1042	211.959	4.23179
				1043	212.006	6.43637
				1044	212.23	4.47997
				1045	212.238	4.05857
				1046	212.293	4.72875
				1047	212.339	4.30004
				1048	212.362	4.73572
				1049	212.444	4.46827
				1050	212.456	4.92226
				1051	212.59	5.97563
				1052	212.59	6.86158
				1053	212.606	4.46061
				1054	212.672	16.0893
				1055	212.675	4.91263
				1056	212.837	6.79275
				1057	212.984	3.8926
				1058	213.034	4.02966
				1059	213.102	3.89281
				1060	213.154	3.92345
				1061	213.187	5.61997
				1062	213.199	4.5992
				1063	213.318	4.10939
				1064	213.331	8.61311
				1065	213.368	4.26076
				1066	213.509	4.67158
				1067	213.53	4.901
				1068	213.533	4.92938
				1069	213.562	4.00281
				1070	213.591	5.10744
				1071	213.742	7.23615
				1072	213.742	6.45378
				1073	213.79	4.02414
				1074	213.839	5.70183
				1075	213.91	3.92233
				1076	213.945	4.90164
				1077	214.076	4.07259
				1078	214.167	4.19839
				1079	214.193	4.36196
				1080	214.236	6.45941
				1081	214.318	6.46035
				1082	214.318	5.99768
				1083	214.448	4.07642
				1084	214.482	6.53071
				1085	214.591	4.02019
				1086	214.702	4.72822
				1087	214.71	4.00031
				1088	214.856	4.12856
				1089	214.869	4.62842
				1090	214.893	7.54375
				1091	214.893	6.67378
				1092	214.924	4.13288
				1093	214.948	4.42595
				1094	214.975	6.6052
				1095	214.999	4.22536
				1096	215.001	4.23046
				1097	215.012	5.08077
				1098	215.056	4.12354
				1099	215.058	6.95841
				1100	215.074	4.16909
				1101	215.14	6.40196
				1102	215.14	6.81689
				1103	215.149	3.9737
				1104	215.156	4.56333
				1105	215.222	7.03195
				1106	215.269	3.99655
				1107	215.318	4.0473
				1108	215.337	4.62785
				1109	215.386	8.08024
				1110	215.423	4.59668
				1111	215.468	6.89124
				1112	215.468	6.54182
				1113	215.591	6.26863
				1114	215.633	6.96427
				1115	215.7	4.06193
				1116	215.731	3.94267
				1117	215.766	4.81683
				1118	215.797	6.21023
				1119	215.933	5.1467
				1120	215.948	4.89521
				1121	215.961	11.7569
				1122	216.003	4.93804
				1123	216.024	3.93085
				1124	216.043	6.34547
				1125	216.043	7.04017
				1126	216.08	4.41183
				1127	216.111	4.13561
				1128	216.121	4.8224
				1129	216.185	4.64108
				1130	216.207	6.55017
				1131	216.207	6.97013
				1132	216.24	4.22887
				1133	216.242	4.47521
				1134	216.289	7.18731
				1135	216.389	5.75436
				1136	216.396	3.93003
				1137	216.423	4.5722
				1138	216.433	4.9096
				1139	216.434	3.98304
				1140	216.514	4.31045
				1141	216.55	5.0624
				1142	216.676	5.63381
				1143	216.699	6.76319
				1144	216.72	3.97368
				1145	216.781	6.62528
				1146	216.848	4.07229
				1147	216.945	7.19368
				1148	216.945	7.41345
				1149	217.066	4.0742
				1150	217.248	4.06537
				1151	217.28	4.02699
				1152	217.311	4.04417
				1153	217.327	4.91185
				1154	217.355	7.34365
				1155	217.355	6.84033
				1156	217.373	4.1474
				1157	217.419	4.08359
				1158	217.437	6.8412
				1159	217.443	4.19117
				1160	217.459	3.9707
				1161	217.49	4.10761
				1162	217.519	6.98359
				1163	217.519	6.10236
				1164	217.535	4.07004
				1165	217.589	4.05539
				1166	217.601	8.48485
				1167	217.601	21.3882
				1168	217.668	4.0721
				1169	217.808	4.5566
				1170	217.812	3.98982
				1171	217.812	4.19728
				1172	217.834	4.00532
				1173	217.848	4.20064
				1174	217.956	4.30651
				1175	218.142	4.10308
				1176	218.194	5.23445
				1177	218.198	4.11974
				1178	218.257	7.8739
				1179	218.423	4.05046
				1180	218.521	4.08137
				1181	218.743	4.11332
				1182	218.797	4.24389
				1183	218.864	4.02351
				1184	218.912	7.57946
				1185	218.993	6.24964
				1186	219.105	5.09076
				1187	219.116	4.29281
				1188	219.129	4.0951
				1189	219.216	4.19997
				1190	219.228	4.75489
				1191	219.269	4.10121
				1192	219.315	4.12068
				1193	219.39	5.98242
				1194	219.432	4.12268
				1195	219.484	6.51995
				1196	219.628	7.19983
				1197	219.649	4.03486
				1198	219.656	4.12082
				1199	219.665	4.2076
				1200	219.826	4.04135
				1201	219.952	4.38622
				1202	219.987	4.09185
				1203	220.069	4.15091
				1204	220.082	4.77271
				1205	220.139	7.08165
				1206	220.2	4.02063
				1207	220.295	4.14753
				1208	220.384	7.2274
				1209	220.469	4.11763
				1210	220.473	4.67082
				1211	220.499	4.19771
				1212	220.518	4.09784
				1213	220.532	4.18077
				1214	220.687	4.57295
				1215	220.792	7.74507
				1216	220.792	7.01747
				1217	220.845	4.16186
				1218	220.956	7.82132
				1219	221.282	7.60087
				1220	221.364	7.16544
				1221	221.439	4.25963
				1222	221.504	4.68359
				1223	221.869	5.21985
				1224	222.141	4.16363
				1225	222.18	6.82295
				1226	222.763	4.35356
				1227	223.24	7.2558
				1228	223.24	4.9437
				1229	223.798	6.22793
				1230	223.848	4.12207
				1231	224.299	6.06596
				1232	224.683	7.47432
				1233	224.893	4.48009
				1234	225.173	6.63107
				1235	225.276	7.20526
				1236	225.601	7.42271
				1237	226.379	4.66494
				1238	226.597	4.90807
				1239	226.901	7.29272
				1240	226.982	9.89246
				1241	227.281	7.83006
				1242	227.55	6.95095
				1243	227.702	4.82372
				1244	227.837	4.68942
				1245	228.083	4.86533
				1246	228.586	7.80682
				1247	228.597	4.49474
				1248	228.663	4.73218
				1249	228.735	4.22232
				1250	229.107	4.6759
				1251	229.249	4.68076
				1252	229.366	5.02601
				1253	229.496	8.87986
				1254	229.709	5.05332
				1255	230.062	5.08089
				1256	230.406	4.81942
				1257	230.847	5.41397
				1258	230.876	4.53937
				1259	230.882	4.48533
				1260	231.368	4.80039
				1261	231.405	4.77881
				1262	231.471	4.70747
				1263	232.558	4.79602
				1264	232.625	4.92223
				1265	232.884	5.03238
				1266	232.927	5.61882
				1267	233.191	5.39123
				1268	233.432	4.87217
				1269	233.543	4.87168
				1270	234.145	5.39166
				1271	234.202	4.95147
				1272	234.247	15.3204
				1273	234.758	4.87675
				1274	235.195	4.92493
				1275	235.536	4.81411
				1276	235.657	4.82988
				1277	235.801	4.68053
				1278	236.277	12.6402
				1279	236.823	5.06374
				1280	237.684	4.9313
				1281	237.885	10.1897
				1282	238.122	5.55956
				1283	238.418	5.81796
				1284	238.551	5.04892
				1285	239.17	8.42365
				1286	239.977	4.96727
				1287	241.334	6.84761
				1288	241.654	7.65446
				1289	243.812	6.39176
				1290	244.371	8.17736
				1291	245.01	6.7065
				1292	245.329	6.89718
				1293	246.604	7.98481
				1294	246.922	8.49029
				1295	247.32	8.13348
				1296	247.4	8.56753
				1297	247.479	10.242
				1298	248.116	7.5852
				1299	248.116	8.50077
				1300	250.34	7.14939
				1301	251.054	7.41748
				1302	251.133	7.41839
				1303	251.326	5.22993
				1304	251.45	7.42203
				1305	251.688	7.55728
				1306	252.084	9.34814
				1307	252.164	7.10827
				1308	252.48	7.30362
				1309	252.876	7.77225
				1310	253.035	6.99445
				1311	254.774	7.65837
				1312	255.169	7.93283
				1313	255.248	7.02278
				1314	255.564	7.34041
				1315	255.88	7.2172
				1316	256.432	7.54497
				1317	256.511	7.67774
				1318	256.59	8.22359
				1319	256.669	7.22694
				1320	256.826	8.94034
				1321	256.984	8.43819
				1322	257.142	7.95358
				1323	257.142	8.2989
				1324	258.402	6.48851
				1325	258.402	8.24161
				1326	259.032	7.90605
				1327	260.839	7.66104
				1328	261.703	11.1027
				1329	262.801	7.88049
				1330	269.364	8.62732
				1331	270.998	7.52966
				1332	273.406	15.1763
				1333	274.181	11.168
				1334	278.589	9.20276
				1335	278.975	10.1424
				IsoLine	IsoLine	IsoLine	IsoLine

## Sheet: PlotDat7
Source sheet	ZirconData	0	0	87.5	0	0	0
Plot name	ProbDens2	1.75	0	175	0	3498.25	0
Plot Type	16	3.5	0	175	690
1st free col	9	5.25	0	87.5	690
Sigma Level	2	7	0	87.5	0
Absolute Errs	TRUE	8.75	0	ErrBox	ErrBox
Symbol Type	1	10.5	0	175	0
Inverse Plot	FALSE	12.25	0	262.5	0
Color Plot	TRUE	14	0	262.5	502
3D plot	FALSE	15.75	0	175	502
Linear	FALSE	17.5	0	175	0
Data Range	AA137:AB1480	19.25	0	ErrBox	ErrBox
Filled Symbols	FALSE	21	0	262.5	0
ConcAge	FALSE	22.75	0	350	0
ConcSwap	TRUE	24.5	0	350	19
1st Symbol-row	1	26.25	0	262.5	19
		28	0	262.5	0
		29.75	0	ErrBox	ErrBox
		31.5	0	350	0
		33.25	0	437.5	0
		35	0	437.5	22
		36.75	0	350	22
		38.5	0	350	0
		40.25	0	ErrBox	ErrBox
		42	0	437.5	0
		43.75	0	525	0
		45.5	0	525	16
		47.25	0	437.5	16
		49	0	437.5	0
		50.75	0	ErrBox	ErrBox
		52.5	0	525	0
		54.25	0	612.5	0
		56	0	612.5	4
		57.75	0	525	4
		59.5	0	525	0
		61.25	0	ErrBox	ErrBox
		63	0	612.5	0
		64.75	0	700	0
		66.5	0	700	2
		68.25	0	612.5	2
		70	0	612.5	0
		71.75	0	ErrBox	ErrBox
		73.5	0	700	0
		75.25	0	787.5	0
		77	0	787.5	6
		78.75	0	700	6
		80.5	0	700	0
		82.25	0	ErrBox	ErrBox
		84	2.63268e-08	787.5	0
		85.75	1.2232e-06	875	0
		87.5	1.9105e-05	875	4
		89.25	0.000100365	787.5	4
		91	0.000179279	787.5	0
		92.75	0.000139854	ErrBox	ErrBox
		94.5	0.000320096	875	0
		96.25	0.00180999	962.5	0
		98	0.00712871	962.5	2
		99.75	0.0168758	875	2
		101.5	0.0271608	875	0
		103.25	0.0254613	ErrBox	ErrBox
		105	0.0153806	962.5	0
		106.75	0.00779166	1050	0
		108.5	0.0046771	1050	6
		110.25	0.00346116	962.5	6
		112	0.0018386	962.5	0
		113.75	0.00102008	ErrBox	ErrBox
		115.5	0.000893538	1050	0
		117.25	0.00089127	1137.5	0
		119	0.000594833	1137.5	5
		120.75	0.000509484	1050	5
		122.5	0.000562434	1050	0
		124.25	0.000594071	ErrBox	ErrBox
		126	0.00064289	1137.5	0
		127.75	0.000602841	1225	0
		129.5	0.000417914	1225	4
		131.25	0.000249024	1137.5	4
		133	0.000207875	1137.5	0
		134.75	0.000361628	ErrBox	ErrBox
		136.5	0.000836362	1225	0
		138.25	0.00115019	1312.5	0
		140	0.00104672	1312.5	5
		141.75	0.000965094	1225	5
		143.5	0.00132233	1225	0
		145.25	0.00310728	ErrBox	ErrBox
		147	0.00728552	1312.5	0
		148.75	0.0125074	1400	0
		150.5	0.0139991	1400	4
		152.25	0.0122652	1312.5	4
		154	0.00993546	1312.5	0
		155.75	0.00770514	ErrBox	ErrBox
		157.5	0.00684909	1487.5	0
		159.25	0.00780648	1575	0
		161	0.00960922	1575	3
		162.75	0.0117375	1487.5	3
		164.5	0.01346	1487.5	0
		166.25	0.0139501	ErrBox	ErrBox
		168	0.0120215	1575	0
		169.75	0.00958645	1662.5	0
		171.5	0.00765055	1662.5	7
		173.25	0.00584099	1575	7
		175	0.00452169	1575	0
		176.75	0.00396945	ErrBox	ErrBox
		178.5	0.00343127	1662.5	0
		180.25	0.00285086	1750	0
		182	0.00235317	1750	6
		183.75	0.00200881	1662.5	6
		185.5	0.00173406	1662.5	0
		187.25	0.00141658	ErrBox	ErrBox
		189	0.00120569	1750	0
		190.75	0.00117305	1837.5	0
		192.5	0.00118794	1837.5	5
		194.25	0.00122802	1750	5
		196	0.00158495	1750	0
		197.75	0.0025183	ErrBox	ErrBox
		199.5	0.00389871	1837.5	0
		201.25	0.00536133	1925	0
		203	0.00686728	1925	5
		204.75	0.00860432	1837.5	5
		206.5	0.0109475	1837.5	0
		208.25	0.0132394	ErrBox	ErrBox
		210	0.0141576	1925	0
		211.75	0.0139061	2012.5	0
		213.5	0.0136695	2012.5	1
		215.25	0.0136703	1925	1
		217	0.0131612	1925	0
		218.75	0.0114234	ErrBox	ErrBox
		220.5	0.00841355	2012.5	0
		222.25	0.00528772	2100	0
		224	0.00336838	2100	3
		225.75	0.00279914	2012.5	3
		227.5	0.00294478	2012.5	0
		229.25	0.00314533	ErrBox	ErrBox
		231	0.00308209	2100	0
		232.75	0.0028146	2187.5	0
		234.5	0.00245302	2187.5	1
		236.25	0.00202228	2100	1
		238	0.00158005	2100	0
		239.75	0.00123082	ErrBox	ErrBox
		241.5	0.00103721	2275	0
		243.25	0.00100494	2362.5	0
		245	0.0010854	2362.5	5
		246.75	0.00122007	2275	5
		248.5	0.00139175	2275	0
		250.25	0.00158294	ErrBox	ErrBox
		252	0.00173278	2362.5	0
		253.75	0.001782	2450	0
		255.5	0.00171018	2450	1
		257.25	0.00151737	2362.5	1
		259	0.00122745	2362.5	0
		260.75	0.000902936	ErrBox	ErrBox
		262.5	0.00061752	2450	0
		264.25	0.000413813	2537.5	0
		266	0.00029304	2537.5	2
		267.75	0.000233559	2450	2
		269.5	0.000210794	2450	0
		271.25	0.000206521	ErrBox	ErrBox
		273	0.000210012	2537.5	0
		274.75	0.000214936	2625	0
		276.5	0.000215694	2625	5
		278.25	0.000206748	2537.5	5
		280	0.000185284	2537.5	0
		281.75	0.000153729	ErrBox	ErrBox
		283.5	0.00011901	2625	0
		285.25	8.88824e-05	2712.5	0
		287	6.82925e-05	2712.5	4
		288.75	5.8078e-05	2625	4
		290.5	5.60156e-05	2625	0
		292.25	5.87551e-05	ErrBox	ErrBox
		294	6.32876e-05	2712.5	0
		295.75	6.7561e-05	2800	0
		297.5	7.05099e-05	2800	2
		299.25	7.18532e-05	2712.5	2
		301	7.19102e-05	2712.5	0
		302.75	7.14757e-05	ErrBox	ErrBox
		304.5	7.16691e-05	2800	0
		306.25	7.36943e-05	2887.5	0
		308	7.84788e-05	2887.5	1
		309.75	8.63313e-05	2800	1
		311.5	9.68311e-05	2800	0
		313.25	0.000109069	ErrBox	ErrBox
		315	0.000122203	2887.5	0
		316.75	0.000136052	2975	0
		318.5	0.00015148	2975	1
		320.25	0.000170459	2887.5	1
		322	0.00019567	2887.5	0
		323.75	0.000229256	ErrBox	ErrBox
		325.5	0.000270443	3237.5	0
		327.25	0.000312944	3325	0
		329	0.000344913	3325	1
		330.75	0.000353887	3237.5	1
		332.5	0.000334905	3237.5	0
		334.25	0.000295449	ErrBox	ErrBox
		336	0.000251759
		337.75	0.000218127
		339.5	0.000197484
		341.25	0.000181438
		343	0.000159836
		344.75	0.000130566
		346.5	0.000100469
		348.25	7.84671e-05
		350	6.94209e-05
		351.75	7.33149e-05
		353.5	8.74239e-05
		355.25	0.000108044
		357	0.000131334
		358.75	0.000154069
		360.5	0.000174174
		362.25	0.000190346
		364	0.000200978
		365.75	0.000203777
		367.5	0.000196919
		369.25	0.000180802
		371	0.000158555
		372.75	0.00013469
		374.5	0.000113047
		376.25	9.55785e-05
		378	8.24431e-05
		379.75	7.28474e-05
		381.5	6.5973e-05
		383.25	6.16118e-05
		385	6.0406e-05
		386.75	6.36688e-05
		388.5	7.28245e-05
		390.25	8.86541e-05
		392	0.000110682
		393.75	0.000137065
		395.5	0.000165133
		397.25	0.000192389
		399	0.000217425
		400.75	0.000240211
		402.5	0.000261472
		404.25	0.000281481
		406	0.00029905
		407.75	0.000311432
		409.5	0.000315366
		411.25	0.000308707
		413	0.000291719
		414.75	0.000267354
		416.5	0.000240437
		418.25	0.000216322
		420	0.000199606
		421.75	0.000193238
		423.5	0.000198044
		425.25	0.00021262
		427	0.000233658
		428.75	0.00025675
		430.5	0.000277535
		432.25	0.000292805
		434	0.000301188
		435.75	0.000303179
		437.5	0.000300617
		439.25	0.000295871
		441	0.000291018
		442.75	0.000287251
		444.5	0.000284598
		446.25	0.000282009
		448	0.000277757
		449.75	0.000270027
		451.5	0.000257503
		453.25	0.000239745
		455	0.000217268
		456.75	0.000191355
		458.5	0.000163707
		460.25	0.000136101
		462	0.000110101
		463.75	8.69023e-05
		465.5	6.72599e-05
		467.25	5.1496e-05
		469	3.95691e-05
		470.75	3.11941e-05
		472.5	2.59769e-05
		474.25	2.35436e-05
		476	2.36296e-05
		477.75	2.61057e-05
		479.5	3.09312e-05
		481.25	3.80524e-05
		483	4.7261e-05
		484.75	5.80741e-05
		486.5	6.96797e-05
		488.25	8.09866e-05
		490	9.07965e-05
		491.75	9.80382e-05
		493.5	0.000102029
		495.25	0.00010265
		497	0.000100389
		498.75	9.62286e-05
		500.5	9.14273e-05
		502.25	8.72671e-05
		504	8.48389e-05
		505.75	8.49226e-05
		507.5	8.79587e-05
		509.25	9.40864e-05
		511	0.000103191
		512.75	0.0001149
		514.5	0.000128505
		516.25	0.000142823
		518	0.00015611
		519.75	0.000166187
		521.5	0.00017088
		523.25	0.000168705
		525	0.000159517
		526.75	0.000144734
		528.5	0.000126957
		530.25	0.000109116
		532	9.35446e-05
		533.75	8.14317e-05
		535.5	7.28068e-05
		537.25	6.69342e-05
		539	6.28261e-05
		540.75	5.96196e-05
		542.5	5.67236e-05
		544.25	5.37875e-05
		546	5.0602e-05
		547.75	4.70204e-05
		549.5	4.29484e-05
		551.25	3.83616e-05
		553	3.33453e-05
		554.75	2.80932e-05
		556.5	2.2887e-05
		558.25	1.80386e-05
		560	1.38364e-05
		561.75	1.05074e-05
		563.5	8.20326e-06
		565.25	7.00792e-06
		567	6.95513e-06
		568.75	8.0436e-06
		570.5	1.02395e-05
		572.25	1.34686e-05
		574	1.75946e-05
		575.75	2.24068e-05
		577.5	2.76189e-05
		579.25	3.28956e-05
		581	3.78893e-05
		582.75	4.22969e-05
		584.5	4.59066e-05
		586.25	4.86263e-05
		588	5.0483e-05
		589.75	5.15972e-05
		591.5	5.214e-05
		593.25	5.22956e-05
		595	5.22368e-05
		596.75	5.212e-05
		598.5	5.20934e-05
		600.25	5.23037e-05
		602	5.28908e-05
		603.75	5.39618e-05
		605.5	5.55529e-05
		607.25	5.75912e-05
		609	5.98751e-05
		610.75	6.2085e-05
		612.5	6.3828e-05
		614.25	6.4706e-05
		616	6.43909e-05
		617.75	6.26865e-05
		619.5	5.9563e-05
		621.25	5.51564e-05
		623	4.97382e-05
		624.75	4.36632e-05
		626.5	3.73143e-05
		628.25	3.10475e-05
		630	2.51572e-05
		631.75	1.98547e-05
		633.5	1.52643e-05
		635.25	1.14315e-05
		637	8.33945e-06
		638.75	5.92354e-06
		640.5	4.09673e-06
		642.25	2.75726e-06
		644	1.80528e-06
		645.75	1.14942e-06
		647.5	7.11485e-07
		649.25	4.28112e-07
		651	2.50472e-07
		652.75	1.42619e-07
		654.5	7.92227e-08
		656.25	4.28139e-08
		658	2.32103e-08
		659.75	1.27836e-08
		661.5	7.4643e-09
		663.25	4.89061e-09
		665	3.74526e-09
		666.75	2.82102e-09
		668.5	3.03884e-09
		670.25	3.2722e-09
		672	3.52209e-09
		673.75	3.78957e-09
		675.5	4.07577e-09
		677.25	4.38187e-09
		679	4.7091e-09
		680.75	5.05879e-09
		682.5	5.4323e-09
		684.25	7.2427e-09
		686	9.92359e-09
		687.75	1.32278e-08
		689.5	1.97579e-08
		691.25	2.9873e-08
		693	4.86777e-08
		694.75	8.03985e-08
		696.5	1.32136e-07
		698.25	2.17574e-07
		700	3.53194e-07
		701.75	5.64269e-07
		703.5	8.84635e-07
		705.25	1.35883e-06
		707	2.0434e-06
		708.75	3.00758e-06
		710.5	4.33275e-06
		712.25	6.11054e-06
		714	8.43884e-06
		715.75	1.14155e-05
		717.5	1.51305e-05
		719.25	1.96519e-05
		721	2.50126e-05
		722.75	3.11924e-05
		724.5	3.81043e-05
		726.25	4.55777e-05
		728	5.33526e-05
		729.75	6.10829e-05
		731.5	6.83554e-05
		733.25	7.47252e-05
		735	7.97649e-05
		736.75	8.31243e-05
		738.5	8.45849e-05
		740.25	8.41092e-05
		742	8.1861e-05
		743.75	7.8198e-05
		745.5	7.36344e-05
		747.25	6.87775e-05
		749	6.42463e-05
		750.75	6.05932e-05
		752.5	5.82351e-05
		754.25	5.74043e-05
		756	5.81283e-05
		757.75	6.02367e-05
		759.5	6.33923e-05
		761.25	6.71396e-05
		763	7.09635e-05
		764.75	7.43503e-05
		766.5	7.68409e-05
		768.25	7.80768e-05
		770	7.78315e-05
		771.75	7.6022e-05
		773.5	7.27027e-05
		775.25	6.80521e-05
		777	6.23377e-05
		778.75	5.58856e-05
		780.5	4.90408e-05
		782.25	4.21334e-05
		784	3.54555e-05
		785.75	2.9239e-05
		787.5	2.3649e-05
		789.25	1.87845e-05
		791	1.46868e-05
		792.75	1.13464e-05
		794.5	8.72137e-06
		796.25	6.7442e-06
		798	5.34251e-06
		799.75	4.44013e-06
		801.5	3.96935e-06
		803.25	3.87224e-06
		805	4.10252e-06
		806.75	4.62504e-06
		808.5	5.41384e-06
		810.25	6.44943e-06
		812	7.71591e-06
		813.75	9.19832e-06
		815.5	1.08805e-05
		817.25	1.27435e-05
		819	1.4767e-05
		820.75	1.69268e-05
		822.5	1.91977e-05
		824.25	2.1558e-05
		826	2.39837e-05
		827.75	2.6455e-05
		829.5	2.89574e-05
		831.25	3.14764e-05
		833	3.39993e-05
		834.75	3.65131e-05
		836.5	3.90005e-05
		838.25	4.14435e-05
		840	4.38227e-05
		841.75	4.61217e-05
		843.5	4.83323e-05
		845.25	5.04603e-05
		847	5.25287e-05
		848.75	5.45775e-05
		850.5	5.66525e-05
		852.25	5.87942e-05
		854	6.10136e-05
		855.75	6.32726e-05
		857.5	6.54609e-05
		859.25	6.74017e-05
		861	6.88595e-05
		862.75	6.95741e-05
		864.5	6.93068e-05
		866.25	6.78899e-05
		868	6.52681e-05
		869.75	6.15198e-05
		871.5	5.68523e-05
		873.25	5.15723e-05
		875	4.60381e-05
		876.75	4.06055e-05
		878.5	3.55807e-05
		880.25	3.11867e-05
		882	2.7551e-05
		883.75	2.47091e-05
		885.5	2.26234e-05
		887.25	2.12067e-05
		889	2.03442e-05
		890.75	1.99171e-05
		892.5	1.98109e-05
		894.25	1.99282e-05
		896	2.01854e-05
		897.75	2.05192e-05
		899.5	2.08759e-05
		901.25	2.12165e-05
		903	2.15114e-05
		904.75	2.17389e-05
		906.5	2.18867e-05
		908.25	2.19466e-05
		910	2.192e-05
		911.75	2.18121e-05
		913.5	2.16352e-05
		915.25	2.14076e-05
		917	2.11524e-05
		918.75	2.08976e-05
		920.5	2.06749e-05
		922.25	2.05194e-05
		924	2.04677e-05
		925.75	2.05584e-05
		927.5	2.08268e-05
		929.25	2.13092e-05
		931	2.20343e-05
		932.75	2.30264e-05
		934.5	2.43026e-05
		936.25	2.5868e-05
		938	2.77169e-05
		939.75	2.98306e-05
		941.5	3.21772e-05
		943.25	3.4712e-05
		945	3.73784e-05
		946.75	4.01105e-05
		948.5	4.28366e-05
		950.25	4.5481e-05
		952	4.79701e-05
		953.75	5.02384e-05
		955.5	5.22292e-05
		957.25	5.38997e-05
		959	5.52257e-05
		960.75	5.62014e-05
		962.5	5.68372e-05
		964.25	5.71626e-05
		966	5.72208e-05
		967.75	5.70655e-05
		969.5	5.67563e-05
		971.25	5.63538e-05
		973	5.59157e-05
		974.75	5.54894e-05
		976.5	5.51128e-05
		978.25	5.48093e-05
		980	5.45876e-05
		981.75	5.44416e-05
		983.5	5.43524e-05
		985.25	5.42905e-05
		987	5.42194e-05
		988.75	5.40992e-05
		990.5	5.38903e-05
		992.25	5.35592e-05
		994	5.30776e-05
		995.75	5.24277e-05
		997.5	5.16036e-05
		999.25	5.06083e-05
		1001	4.94577e-05
		1002.75	4.81761e-05
		1004.5	4.67951e-05
		1006.25	4.53503e-05
		1008	4.38797e-05
		1009.75	4.24203e-05
		1011.5	4.1006e-05
		1013.25	3.96665e-05
		1015	3.8425e-05
		1016.75	3.72987e-05
		1018.5	3.62978e-05
		1020.25	3.54266e-05
		1022	3.46833e-05
		1023.75	3.40638e-05
		1025.5	3.35582e-05
		1027.25	3.31554e-05
		1029	3.28433e-05
		1030.75	3.26094e-05
		1032.5	3.24416e-05
		1034.25	3.23287e-05
		1036	3.22607e-05
		1037.75	3.22291e-05
		1039.5	3.22268e-05
		1041.25	3.2248e-05
		1043	3.2288e-05
		1044.75	3.23427e-05
		1046.5	3.24109e-05
		1048.25	3.24898e-05
		1050	3.2578e-05
		1051.75	3.26744e-05
		1053.5	3.27783e-05
		1055.25	3.28891e-05
		1057	3.30065e-05
		1058.75	3.31301e-05
		1060.5	3.32588e-05
		1062.25	3.3394e-05
		1064	3.35342e-05
		1065.75	3.3679e-05
		1067.5	3.38282e-05
		1069.25	3.39814e-05
		1071	3.4138e-05
		1072.75	3.42978e-05
		1074.5	3.44601e-05
		1076.25	3.46246e-05
		1078	3.47909e-05
		1079.75	3.49583e-05
		1081.5	3.51266e-05
		1083.25	3.52952e-05
		1085	3.54638e-05
		1086.75	3.56319e-05
		1088.5	3.57992e-05
		1090.25	3.59653e-05
		1092	3.61306e-05
		1093.75	3.62934e-05
		1095.5	3.6454e-05
		1097.25	3.66123e-05
		1099	3.67679e-05
		1100.75	3.69208e-05
		1102.5	3.70706e-05
		1104.25	3.72172e-05
		1106	3.73606e-05
		1107.75	3.75006e-05
		1109.5	3.7637e-05
		1111.25	3.77699e-05
		1113	3.78992e-05
		1114.75	3.80247e-05
		1116.5	3.81466e-05
		1118.25	3.82648e-05
		1120	3.83793e-05
		1121.75	3.84902e-05
		1123.5	3.85973e-05
		1125.25	3.87009e-05
		1127	3.88009e-05
		1128.75	3.88973e-05
		1130.5	3.89903e-05
		1132.25	3.90799e-05
		1134	3.91662e-05
		1135.75	3.92499e-05
		1137.5	3.93298e-05
		1139.25	3.94065e-05
		1141	3.94802e-05
		1142.75	3.95509e-05
		1144.5	3.96187e-05
		1146.25	3.9683e-05
		1148	3.97454e-05
		1149.75	3.98051e-05
		1151.5	3.98622e-05
		1153.25	3.99167e-05
		1155	3.99688e-05
		1156.75	4.00192e-05
		1158.5	4.00665e-05
		1160.25	4.01116e-05
		1162	4.01544e-05
		1163.75	4.0195e-05
		1165.5	4.02336e-05
		1167.25	4.027e-05
		1169	4.03044e-05
		1170.75	4.03368e-05
		1172.5	4.03671e-05
		1174.25	4.03956e-05
		1176	4.04221e-05
		1177.75	4.04467e-05
		1179.5	4.04694e-05
		1181.25	4.04902e-05
		1183	4.05091e-05
		1184.75	4.05262e-05
		1186.5	4.05413e-05
		1188.25	4.05546e-05
		1190	4.05667e-05
		1191.75	4.05761e-05
		1193.5	4.05837e-05
		1195.25	4.05892e-05
		1197	4.05928e-05
		1198.75	4.05943e-05
		1200.5	4.05937e-05
		1202.25	4.05911e-05
		1204	4.05863e-05
		1205.75	4.05793e-05
		1207.5	4.05701e-05
		1209.25	4.05586e-05
		1211	4.05448e-05
		1212.75	4.05285e-05
		1214.5	4.05098e-05
		1216.25	4.04886e-05
		1218	4.04648e-05
		1219.75	4.04384e-05
		1221.5	4.04093e-05
		1223.25	4.03775e-05
		1225	4.03428e-05
		1226.75	4.03052e-05
		1228.5	4.02654e-05
		1230.25	4.02219e-05
		1232	4.01753e-05
		1233.75	4.01256e-05
		1235.5	4.00727e-05
		1237.25	4.00165e-05
		1239	3.99569e-05
		1240.75	3.9894e-05
		1242.5	3.98276e-05
		1244.25	3.97577e-05
		1246	3.96843e-05
		1247.75	3.96072e-05
		1249.5	3.95265e-05
		1251.25	3.9442e-05
		1253	3.93538e-05
		1254.75	3.92626e-05
		1256.5	3.91668e-05
		1258.25	3.90672e-05
		1260	3.89636e-05
		1261.75	3.88562e-05
		1263.5	3.87448e-05
		1265.25	3.86294e-05
		1267	3.851e-05
		1268.75	3.83866e-05
		1270.5	3.82592e-05
		1272.25	3.81278e-05
		1274	3.79932e-05
		1275.75	3.78538e-05
		1277.5	3.77105e-05
		1279.25	3.75632e-05
		1281	3.74119e-05
		1282.75	3.72568e-05
		1284.5	3.70977e-05
		1286.25	3.69348e-05
		1288	3.6768e-05
		1289.75	3.65975e-05
		1291.5	3.64232e-05
		1293.25	3.62453e-05
		1295	3.60637e-05
		1296.75	3.58786e-05
		1298.5	3.56916e-05
		1300.25	3.54997e-05
		1302	3.53045e-05
		1303.75	3.51061e-05
		1305.5	3.49046e-05
		1307.25	3.46999e-05
		1309	3.44931e-05
		1310.75	3.42828e-05
		1312.5	3.40705e-05
		1314.25	3.38548e-05
		1316	3.36366e-05
		1317.75	3.3416e-05
		1319.5	3.31931e-05
		1321.25	3.2968e-05
		1323	3.2741e-05
		1324.75	3.2512e-05
		1326.5	3.2282e-05
		1328.25	3.20497e-05
		1330	3.18159e-05
		1331.75	3.15808e-05
		1333.5	3.13452e-05
		1335.25	3.11079e-05
		1337	3.08697e-05
		1338.75	3.06307e-05
		1340.5	3.0392e-05
		1342.25	3.0152e-05
		1344	2.99118e-05
		1345.75	2.96715e-05
		1347.5	2.94312e-05
		1349.25	2.91911e-05
		1351	2.89514e-05
		1352.75	2.87122e-05
		1354.5	2.84736e-05
		1356.25	2.8236e-05
		1358	2.79993e-05
		1359.75	2.77638e-05
		1361.5	2.75296e-05
		1363.25	2.72962e-05
		1365	2.70652e-05
		1366.75	2.68361e-05
		1368.5	2.66088e-05
		1370.25	2.63838e-05
		1372	2.61609e-05
		1373.75	2.59406e-05
		1375.5	2.57228e-05
		1377.25	2.5507e-05
		1379	2.52949e-05
		1380.75	2.50859e-05
		1382.5	2.488e-05
		1384.25	2.46775e-05
		1386	2.44784e-05
		1387.75	2.4283e-05
		1389.5	2.40913e-05
		1391.25	2.39035e-05
		1393	2.3719e-05
		1394.75	2.35394e-05
		1396.5	2.33635e-05
		1398.25	2.31927e-05
		1400	2.30265e-05
		1401.75	2.28649e-05
		1403.5	2.27073e-05
		1405.25	2.25555e-05
		1407	2.24094e-05
		1408.75	2.22676e-05
		1410.5	2.21311e-05
		1412.25	2.2e-05
		1414	2.18742e-05
		1415.75	2.1754e-05
		1417.5	2.16394e-05
		1419.25	2.15313e-05
		1421	2.14283e-05
		1422.75	2.13319e-05
		1424.5	2.12408e-05
		1426.25	2.11558e-05
		1428	2.10777e-05
		1429.75	2.10051e-05
		1431.5	2.09388e-05
		1433.25	2.08788e-05
		1435	2.08253e-05
		1436.75	2.07775e-05
		1438.5	2.0737e-05
		1440.25	2.07031e-05
		1442	2.06759e-05
		1443.75	2.06553e-05
		1445.5	2.06415e-05
		1447.25	2.06344e-05
		1449	2.0634e-05
		1450.75	2.06414e-05
		1452.5	2.06548e-05
		1454.25	2.06751e-05
		1456	2.07023e-05
		1457.75	2.07365e-05
		1459.5	2.07775e-05
		1461.25	2.08255e-05
		1463	2.08805e-05
		1464.75	2.09423e-05
		1466.5	2.10112e-05
		1468.25	2.10869e-05
		1470	2.11696e-05
		1471.75	2.12585e-05
		1473.5	2.1355e-05
		1475.25	2.14583e-05
		1477	2.15685e-05
		1478.75	2.16855e-05
		1480.5	2.18093e-05
		1482.25	2.19405e-05
		1484	2.20777e-05
		1485.75	2.22215e-05
		1487.5	2.23719e-05
		1489.25	2.2528e-05
		1491	2.26914e-05
		1492.75	2.28605e-05
		1494.5	2.30366e-05
		1496.25	2.32189e-05
		1498	2.34074e-05
		1499.75	2.36019e-05
		1501.5	2.38024e-05
		1503.25	2.40087e-05
		1505	2.42215e-05
		1506.75	2.44393e-05
		1508.5	2.46626e-05
		1510.25	2.48914e-05
		1512	2.51254e-05
		1513.75	2.53646e-05
		1515.5	2.56089e-05
		1517.25	2.58581e-05
		1519	2.61121e-05
		1520.75	2.63707e-05
		1522.5	2.66338e-05
		1524.25	2.69006e-05
		1526	2.71723e-05
		1527.75	2.7448e-05
		1529.5	2.77276e-05
		1531.25	2.80101e-05
		1533	2.82969e-05
		1534.75	2.85871e-05
		1536.5	2.88804e-05
		1538.25	2.91768e-05
		1540	2.94759e-05
		1541.75	2.97776e-05
		1543.5	3.00817e-05
		1545.25	3.03881e-05
		1547	3.06965e-05
		1548.75	3.10068e-05
		1550.5	3.13186e-05
		1552.25	3.16312e-05
		1554	3.19458e-05
		1555.75	3.22622e-05
		1557.5	3.25787e-05
		1559.25	3.28958e-05
		1561	3.32133e-05
		1562.75	3.3531e-05
		1564.5	3.38487e-05
		1566.25	3.41661e-05
		1568	3.44832e-05
		1569.75	3.47996e-05
		1571.5	3.51152e-05
		1573.25	3.54298e-05
		1575	3.57431e-05
		1576.75	3.60549e-05
		1578.5	3.63651e-05
		1580.25	3.66734e-05
		1582	3.69797e-05
		1583.75	3.72838e-05
		1585.5	3.75854e-05
		1587.25	3.78844e-05
		1589	3.81798e-05
		1590.75	3.84731e-05
		1592.5	3.87631e-05
		1594.25	3.90498e-05
		1596	3.9333e-05
		1597.75	3.96125e-05
		1599.5	3.98881e-05
		1601.25	4.01597e-05
		1603	4.04279e-05
		1604.75	4.0691e-05
		1606.5	4.09499e-05
		1608.25	4.12041e-05
		1610	4.14528e-05
		1611.75	4.16975e-05
		1613.5	4.19372e-05
		1615.25	4.21717e-05
		1617	4.24011e-05
		1618.75	4.26251e-05
		1620.5	4.28436e-05
		1622.25	4.30566e-05
		1624	4.32648e-05
		1625.75	4.34666e-05
		1627.5	4.36626e-05
		1629.25	4.38527e-05
		1631	4.40369e-05
		1632.75	4.42152e-05
		1634.5	4.43874e-05
		1636.25	4.45535e-05
		1638	4.47135e-05
		1639.75	4.48673e-05
		1641.5	4.50149e-05
		1643.25	4.51563e-05
		1645	4.52914e-05
		1646.75	4.54202e-05
		1648.5	4.55428e-05
		1650.25	4.56591e-05
		1652	4.57691e-05
		1653.75	4.58727e-05
		1655.5	4.59702e-05
		1657.25	4.60613e-05
		1659	4.61462e-05
		1660.75	4.62248e-05
		1662.5	4.62973e-05
		1664.25	4.63643e-05
		1666	4.64245e-05
		1667.75	4.64786e-05
		1669.5	4.65259e-05
		1671.25	4.6568e-05
		1673	4.6604e-05
		1674.75	4.66342e-05
		1676.5	4.66585e-05
		1678.25	4.6677e-05
		1680	4.66898e-05
		1681.75	4.66969e-05
		1683.5	4.66984e-05
		1685.25	4.66943e-05
		1687	4.66848e-05
		1688.75	4.66699e-05
		1690.5	4.66496e-05
		1692.25	4.66241e-05
		1694	4.65935e-05
		1695.75	4.65578e-05
		1697.5	4.6517e-05
		1699.25	4.64714e-05
		1701	4.6421e-05
		1702.75	4.63658e-05
		1704.5	4.63059e-05
		1706.25	4.62408e-05
		1708	4.6172e-05
		1709.75	4.6098e-05
		1711.5	4.60206e-05
		1713.25	4.5939e-05
		1715	4.58532e-05
		1716.75	4.57635e-05
		1718.5	4.56698e-05
		1720.25	4.55723e-05
		1722	4.5471e-05
		1723.75	4.53662e-05
		1725.5	4.52577e-05
		1727.25	4.51459e-05
		1729	4.50299e-05
		1730.75	4.49115e-05
		1732.5	4.47898e-05
		1734.25	4.46644e-05
		1736	4.45368e-05
		1737.75	4.44063e-05
		1739.5	4.42737e-05
		1741.25	4.41378e-05
		1743	4.39992e-05
		1744.75	4.3858e-05
		1746.5	4.37145e-05
		1748.25	4.35686e-05
		1750	4.34205e-05
		1751.75	4.32702e-05
		1753.5	4.31178e-05
		1755.25	4.29634e-05
		1757	4.28072e-05
		1758.75	4.26491e-05
		1760.5	4.24893e-05
		1762.25	4.23278e-05
		1764	4.21648e-05
		1765.75	4.20004e-05
		1767.5	4.18345e-05
		1769.25	4.16673e-05
		1771	4.14989e-05
		1772.75	4.13301e-05
		1774.5	4.11595e-05
		1776.25	4.0988e-05
		1778	4.08155e-05
		1779.75	4.06422e-05
		1781.5	4.04682e-05
		1783.25	4.02935e-05
		1785	4.01182e-05
		1786.75	3.99423e-05
		1788.5	3.9766e-05
		1790.25	3.95893e-05
		1792	3.94123e-05
		1793.75	3.9235e-05
		1795.5	3.90575e-05
		1797.25	3.88799e-05
		1799	3.87023e-05
		1800.75	3.85247e-05
		1802.5	3.83471e-05
		1804.25	3.81697e-05
		1806	3.79924e-05
		1807.75	3.78154e-05
		1809.5	3.76387e-05
		1811.25	3.74623e-05
		1813	3.72864e-05
		1814.75	3.71108e-05
		1816.5	3.69358e-05
		1818.25	3.67613e-05
		1820	3.65874e-05
		1821.75	3.64141e-05
		1823.5	3.62415e-05
		1825.25	3.60695e-05
		1827	3.58982e-05
		1828.75	3.57277e-05
		1830.5	3.5558e-05
		1832.25	3.53891e-05
		1834	3.52209e-05
		1835.75	3.50536e-05
		1837.5	3.48872e-05
		1839.25	3.47216e-05
		1841	3.45568e-05
		1842.75	3.43929e-05
		1844.5	3.42299e-05
		1846.25	3.40678e-05
		1848	3.39065e-05
		1849.75	3.37461e-05
		1851.5	3.35879e-05
		1853.25	3.34308e-05
		1855	3.32762e-05
		1856.75	3.31257e-05
		1858.5	3.29819e-05
		1860.25	3.28494e-05
		1862	3.27357e-05
		1863.75	3.26525e-05
		1865.5	3.26173e-05
		1867.25	3.2655e-05
		1869	3.27995e-05
		1870.75	3.30942e-05
		1872.5	3.35912e-05
		1874.25	3.43485e-05
		1876	3.54245e-05
		1877.75	3.68695e-05
		1879.5	3.87145e-05
		1881.25	4.09601e-05
		1883	4.35638e-05
		1884.75	4.64364e-05
		1886.5	4.94361e-05
		1888.25	5.23786e-05
		1890	5.50521e-05
		1891.75	5.72403e-05
		1893.5	5.87486e-05
		1895.25	5.94335e-05
		1897	5.92192e-05
		1898.75	5.81116e-05
		1900.5	5.61965e-05
		1902.25	5.36273e-05
		1904	5.06025e-05
		1905.75	4.73396e-05
		1907.5	4.40474e-05
		1909.25	4.09048e-05
		1911	3.80457e-05
		1912.75	3.55537e-05
		1914.5	3.34636e-05
		1916.25	3.17692e-05
		1918	3.04373e-05
		1919.75	2.94149e-05
		1921.5	2.86434e-05
		1923.25	2.80652e-05
		1925	2.76293e-05
		1926.75	2.72935e-05
		1928.5	2.70253e-05
		1930.25	2.6801e-05
		1932	2.66039e-05
		1933.75	2.64238e-05
		1935.5	2.62522e-05
		1937.25	2.60849e-05
		1939	2.59209e-05
		1940.75	2.57579e-05
		1942.5	2.55947e-05
		1944.25	2.54323e-05
		1946	2.52697e-05
		1947.75	2.51067e-05
		1949.5	2.49435e-05
		1951.25	2.478e-05
		1953	2.46164e-05
		1954.75	2.44527e-05
		1956.5	2.4289e-05
		1958.25	2.41252e-05
		1960	2.39608e-05
		1961.75	2.37966e-05
		1963.5	2.36334e-05
		1965.25	2.34704e-05
		1967	2.33078e-05
		1968.75	2.31455e-05
		1970.5	2.2983e-05
		1972.25	2.2821e-05
		1974	2.26604e-05
		1975.75	2.25005e-05
		1977.5	2.23412e-05
		1979.25	2.21828e-05
		1981	2.20252e-05
		1982.75	2.18684e-05
		1984.5	2.17126e-05
		1986.25	2.15586e-05
		1988	2.1405e-05
		1989.75	2.12525e-05
		1991.5	2.11012e-05
		1993.25	2.09512e-05
		1995	2.08016e-05
		1996.75	2.06542e-05
		1998.5	2.05082e-05
		2000.25	2.03635e-05
		2002	2.02203e-05
		2003.75	2.00785e-05
		2005.5	1.99382e-05
		2007.25	1.97994e-05
		2009	1.96621e-05
		2010.75	1.95263e-05
		2012.5	1.93921e-05
		2014.25	1.92594e-05
		2016	1.91283e-05
		2017.75	1.89987e-05
		2019.5	1.88714e-05
		2021.25	1.87449e-05
		2023	1.86199e-05
		2024.75	1.84965e-05
		2026.5	1.83745e-05
		2028.25	1.82533e-05
		2030	1.81343e-05
		2031.75	1.80167e-05
		2033.5	1.79004e-05
		2035.25	1.77855e-05
		2037	1.7672e-05
		2038.75	1.7559e-05
		2040.5	1.74479e-05
		2042.25	1.73381e-05
		2044	1.72301e-05
		2045.75	1.71226e-05
		2047.5	1.70161e-05
		2049.25	1.69114e-05
		2051	1.68068e-05
		2052.75	1.6704e-05
		2054.5	1.66014e-05
		2056.25	1.64995e-05
		2058	1.63984e-05
		2059.75	1.62981e-05
		2061.5	1.61985e-05
		2063.25	1.60994e-05
		2065	1.6001e-05
		2066.75	1.59031e-05
		2068.5	1.58058e-05
		2070.25	1.57089e-05
		2072	1.56124e-05
		2073.75	1.55164e-05
		2075.5	1.54207e-05
		2077.25	1.53253e-05
		2079	1.52303e-05
		2080.75	1.51356e-05
		2082.5	1.50419e-05
		2084.25	1.49478e-05
		2086	1.48539e-05
		2087.75	1.47603e-05
		2089.5	1.46662e-05
		2091.25	1.45732e-05
		2093	1.44811e-05
		2094.75	1.43886e-05
		2096.5	1.42964e-05
		2098.25	1.42044e-05
		2100	1.41128e-05
		2101.75	1.40215e-05
		2103.5	1.39305e-05
		2105.25	1.38399e-05
		2107	1.37498e-05
		2108.75	1.36609e-05
		2110.5	1.35718e-05
		2112.25	1.34833e-05
		2114	1.33954e-05
		2115.75	1.33082e-05
		2117.5	1.32203e-05
		2119.25	1.31347e-05
		2121	1.305e-05
		2122.75	1.29663e-05
		2124.5	1.28835e-05
		2126.25	1.28019e-05
		2128	1.27214e-05
		2129.75	1.26421e-05
		2131.5	1.25643e-05
		2133.25	1.24878e-05
		2135	1.24128e-05
		2136.75	1.23395e-05
		2138.5	1.22678e-05
		2140.25	1.2198e-05
		2142	1.213e-05
		2143.75	1.20633e-05
		2145.5	1.19995e-05
		2147.25	1.19379e-05
		2149	1.18786e-05
		2150.75	1.18216e-05
		2152.5	1.17671e-05
		2154.25	1.17152e-05
		2156	1.16659e-05
		2157.75	1.16195e-05
		2159.5	1.15751e-05
		2161.25	1.15345e-05
		2163	1.1497e-05
		2164.75	1.14626e-05
		2166.5	1.14322e-05
		2168.25	1.14044e-05
		2170	1.138e-05
		2171.75	1.13591e-05
		2173.5	1.13417e-05
		2175.25	1.1328e-05
		2177	1.1318e-05
		2178.75	1.13118e-05
		2180.5	1.13094e-05
		2182.25	1.1311e-05
		2184	1.13165e-05
		2185.75	1.1326e-05
		2187.5	1.13396e-05
		2189.25	1.13573e-05
		2191	1.13791e-05
		2192.75	1.14051e-05
		2194.5	1.14353e-05
		2196.25	1.14698e-05
		2198	1.15084e-05
		2199.75	1.15514e-05
		2201.5	1.15986e-05
		2203.25	1.16501e-05
		2205	1.17058e-05
		2206.75	1.17658e-05
		2208.5	1.183e-05
		2210.25	1.18984e-05
		2212	1.19703e-05
		2213.75	1.2047e-05
		2215.5	1.21287e-05
		2217.25	1.22129e-05
		2219	1.2302e-05
		2220.75	1.23942e-05
		2222.5	1.24911e-05
		2224.25	1.25917e-05
		2226	1.26961e-05
		2227.75	1.28041e-05
		2229.5	1.29157e-05
		2231.25	1.30307e-05
		2233	1.31498e-05
		2234.75	1.32714e-05
		2236.5	1.33969e-05
		2238.25	1.35248e-05
		2240	1.36555e-05
		2241.75	1.3789e-05
		2243.5	1.39251e-05
		2245.25	1.4063e-05
		2247	1.42041e-05
		2248.75	1.43473e-05
		2250.5	1.44925e-05
		2252.25	1.46397e-05
		2254	1.47886e-05
		2255.75	1.4939e-05
		2257.5	1.50908e-05
		2259.25	1.52439e-05
		2261	1.53973e-05
		2262.75	1.55523e-05
		2264.5	1.57089e-05
		2266.25	1.58645e-05
		2268	1.60212e-05
		2269.75	1.61781e-05
		2271.5	1.6335e-05
		2273.25	1.64917e-05
		2275	1.6648e-05
		2276.75	1.68037e-05
		2278.5	1.69587e-05
		2280.25	1.71127e-05
		2282	1.72657e-05
		2283.75	1.74173e-05
		2285.5	1.75675e-05
		2287.25	1.7716e-05
		2289	1.78628e-05
		2290.75	1.80068e-05
		2292.5	1.81494e-05
		2294.25	1.82896e-05
		2296	1.84274e-05
		2297.75	1.85626e-05
		2299.5	1.8695e-05
		2301.25	1.88244e-05
		2303	1.89508e-05
		2304.75	1.9074e-05
		2306.5	1.91938e-05
		2308.25	1.93102e-05
		2310	1.94229e-05
		2311.75	1.95321e-05
		2313.5	1.96374e-05
		2315.25	1.97396e-05
		2317	1.98371e-05
		2318.75	1.99305e-05
		2320.5	2.00206e-05
		2322.25	2.01059e-05
		2324	2.01869e-05
		2325.75	2.02636e-05
		2327.5	2.03353e-05
		2329.25	2.04035e-05
		2331	2.04672e-05
		2332.75	2.05266e-05
		2334.5	2.05816e-05
		2336.25	2.06322e-05
		2338	2.06785e-05
		2339.75	2.07197e-05
		2341.5	2.07574e-05
		2343.25	2.07908e-05
		2345	2.08201e-05
		2346.75	2.08452e-05
		2348.5	2.08662e-05
		2350.25	2.08832e-05
		2352	2.08971e-05
		2353.75	2.09065e-05
		2355.5	2.09123e-05
		2357.25	2.09144e-05
		2359	2.09131e-05
		2360.75	2.09084e-05
		2362.5	2.09006e-05
		2364.25	2.08897e-05
		2366	2.08759e-05
		2367.75	2.08593e-05
		2369.5	2.08402e-05
		2371.25	2.08187e-05
		2373	2.07949e-05
		2374.75	2.0769e-05
		2376.5	2.07413e-05
		2378.25	2.07119e-05
		2380	2.06809e-05
		2381.75	2.06487e-05
		2383.5	2.06153e-05
		2385.25	2.05803e-05
		2387	2.05454e-05
		2388.75	2.05099e-05
		2390.5	2.04742e-05
		2392.25	2.04383e-05
		2394	2.04026e-05
		2395.75	2.03672e-05
		2397.5	2.03316e-05
		2399.25	2.02975e-05
		2401	2.02643e-05
		2402.75	2.02323e-05
		2404.5	2.02009e-05
		2406.25	2.01717e-05
		2408	2.01443e-05
		2409.75	2.01189e-05
		2411.5	2.00955e-05
		2413.25	2.00744e-05
		2415	2.00558e-05
		2416.75	2.00399e-05
		2418.5	2.00267e-05
		2420.25	2.00174e-05
		2422	2.00105e-05
		2423.75	2.00069e-05
		2425.5	2.00067e-05
		2427.25	2.00101e-05
		2429	2.00173e-05
		2430.75	2.00283e-05
		2432.5	2.00433e-05
		2434.25	2.00623e-05
		2436	2.00856e-05
		2437.75	2.01131e-05
		2439.5	2.0145e-05
		2441.25	2.01813e-05
		2443	2.02221e-05
		2444.75	2.02676e-05
		2446.5	2.03176e-05
		2448.25	2.03723e-05
		2450	2.04317e-05
		2451.75	2.04959e-05
		2453.5	2.05648e-05
		2455.25	2.06385e-05
		2457	2.07169e-05
		2458.75	2.08001e-05
		2460.5	2.08881e-05
		2462.25	2.09807e-05
		2464	2.1078e-05
		2465.75	2.118e-05
		2467.5	2.12865e-05
		2469.25	2.13976e-05
		2471	2.15131e-05
		2472.75	2.1633e-05
		2474.5	2.17573e-05
		2476.25	2.18857e-05
		2478	2.20182e-05
		2479.75	2.21547e-05
		2481.5	2.22952e-05
		2483.25	2.24394e-05
		2485	2.25872e-05
		2486.75	2.27386e-05
		2488.5	2.28933e-05
		2490.25	2.30513e-05
		2492	2.32123e-05
		2493.75	2.33763e-05
		2495.5	2.35431e-05
		2497.25	2.37124e-05
		2499	2.38842e-05
		2500.75	2.40583e-05
		2502.5	2.42344e-05
		2504.25	2.44125e-05
		2506	2.45923e-05
		2507.75	2.47736e-05
		2509.5	2.49562e-05
		2511.25	2.514e-05
		2513	2.53247e-05
		2514.75	2.55102e-05
		2516.5	2.56963e-05
		2518.25	2.58827e-05
		2520	2.60686e-05
		2521.75	2.62552e-05
		2523.5	2.64416e-05
		2525.25	2.66275e-05
		2527	2.68127e-05
		2528.75	2.69972e-05
		2530.5	2.71805e-05
		2532.25	2.73627e-05
		2534	2.75433e-05
		2535.75	2.77224e-05
		2537.5	2.79004e-05
		2539.25	2.80757e-05
		2541	2.82487e-05
		2542.75	2.84194e-05
		2544.5	2.85875e-05
		2546.25	2.87528e-05
		2548	2.89152e-05
		2549.75	2.90745e-05
		2551.5	2.92305e-05
		2553.25	2.93831e-05
		2555	2.9532e-05
		2556.75	2.96772e-05
		2558.5	2.98184e-05
		2560.25	2.99556e-05
		2562	3.00885e-05
		2563.75	3.02171e-05
		2565.5	3.03411e-05
		2567.25	3.04606e-05
		2569	3.05753e-05
		2570.75	3.06851e-05
		2572.5	3.07899e-05
		2574.25	3.08889e-05
		2576	3.09835e-05
		2577.75	3.10728e-05
		2579.5	3.11567e-05
		2581.25	3.12351e-05
		2583	3.1308e-05
		2584.75	3.13752e-05
		2586.5	3.14367e-05
		2588.25	3.14925e-05
		2590	3.15425e-05
		2591.75	3.15868e-05
		2593.5	3.16252e-05
		2595.25	3.16576e-05
		2597	3.16841e-05
		2598.75	3.17046e-05
		2600.5	3.17191e-05
		2602.25	3.17276e-05
		2604	3.17301e-05
		2605.75	3.17266e-05
		2607.5	3.17171e-05
		2609.25	3.17016e-05
		2611	3.16802e-05
		2612.75	3.16528e-05
		2614.5	3.16195e-05
		2616.25	3.15804e-05
		2618	3.15355e-05
		2619.75	3.14848e-05
		2621.5	3.14284e-05
		2623.25	3.13664e-05
		2625	3.12988e-05
		2626.75	3.12257e-05
		2628.5	3.11472e-05
		2630.25	3.10633e-05
		2632	3.09742e-05
		2633.75	3.08799e-05
		2635.5	3.07806e-05
		2637.25	3.06763e-05
		2639	3.05672e-05
		2640.75	3.04533e-05
		2642.5	3.03348e-05
		2644.25	3.02118e-05
		2646	3.00844e-05
		2647.75	2.99514e-05
		2649.5	2.9815e-05
		2651.25	2.96753e-05
		2653	2.95318e-05
		2654.75	2.93846e-05
		2656.5	2.92338e-05
		2658.25	2.90795e-05
		2660	2.89219e-05
		2661.75	2.87611e-05
		2663.5	2.85973e-05
		2665.25	2.84307e-05
		2667	2.82614e-05
		2668.75	2.80895e-05
		2670.5	2.79152e-05
		2672.25	2.77386e-05
		2674	2.756e-05
		2675.75	2.73794e-05
		2677.5	2.71971e-05
		2679.25	2.70132e-05
		2681	2.68278e-05
		2682.75	2.66411e-05
		2684.5	2.64532e-05
		2686.25	2.62644e-05
		2688	2.60747e-05
		2689.75	2.58844e-05
		2691.5	2.56935e-05
		2693.25	2.55022e-05
		2695	2.53107e-05
		2696.75	2.51192e-05
		2698.5	2.49277e-05
		2700.25	2.47364e-05
		2702	2.45454e-05
		2703.75	2.4355e-05
		2705.5	2.41652e-05
		2707.25	2.39761e-05
		2709	2.37879e-05
		2710.75	2.36008e-05
		2712.5	2.34148e-05
		2714.25	2.323e-05
		2716	2.30466e-05
		2717.75	2.28647e-05
		2719.5	2.26844e-05
		2721.25	2.25058e-05
		2723	2.23289e-05
		2724.75	2.2154e-05
		2726.5	2.19811e-05
		2728.25	2.18102e-05
		2730	2.16414e-05
		2731.75	2.14749e-05
		2733.5	2.13107e-05
		2735.25	2.11488e-05
		2737	2.09893e-05
		2738.75	2.08323e-05
		2740.5	2.06778e-05
		2742.25	2.05259e-05
		2744	2.03765e-05
		2745.75	2.02298e-05
		2747.5	2.00857e-05
		2749.25	1.99443e-05
		2751	1.98055e-05
		2752.75	1.96695e-05
		2754.5	1.95361e-05
		2756.25	1.94054e-05
		2758	1.92773e-05
		2759.75	1.91512e-05
		2761.5	1.90285e-05
		2763.25	1.89084e-05
		2765	1.87908e-05
		2766.75	1.86758e-05
		2768.5	1.85632e-05
		2770.25	1.84531e-05
		2772	1.83453e-05
		2773.75	1.82399e-05
		2775.5	1.81359e-05
		2777.25	1.80349e-05
		2779	1.7936e-05
		2780.75	1.78391e-05
		2782.5	1.77442e-05
		2784.25	1.76511e-05
		2786	1.75597e-05
		2787.75	1.747e-05
		2789.5	1.73818e-05
		2791.25	1.72951e-05
		2793	1.72097e-05
		2794.75	1.71256e-05
		2796.5	1.70426e-05
		2798.25	1.69607e-05
		2800	1.68796e-05
		2801.75	1.67994e-05
		2803.5	1.67198e-05
		2805.25	1.66408e-05
		2807	1.65622e-05
		2808.75	1.6484e-05
		2810.5	1.6406e-05
		2812.25	1.63281e-05
		2814	1.62502e-05
		2815.75	1.61721e-05
		2817.5	1.60938e-05
		2819.25	1.60151e-05
		2821	1.5936e-05
		2822.75	1.58556e-05
		2824.5	1.57752e-05
		2826.25	1.56941e-05
		2828	1.56121e-05
		2829.75	1.55291e-05
		2831.5	1.54443e-05
		2833.25	1.53592e-05
		2835	1.52727e-05
		2836.75	1.5185e-05
		2838.5	1.50958e-05
		2840.25	1.50051e-05
		2842	1.49129e-05
		2843.75	1.4819e-05
		2845.5	1.47235e-05
		2847.25	1.46262e-05
		2849	1.45271e-05
		2850.75	1.44261e-05
		2852.5	1.43233e-05
		2854.25	1.42186e-05
		2856	1.41119e-05
		2857.75	1.40032e-05
		2859.5	1.38926e-05
		2861.25	1.37799e-05
		2863	1.36652e-05
		2864.75	1.35485e-05
		2866.5	1.34298e-05
		2868.25	1.33091e-05
		2870	1.31855e-05
		2871.75	1.30609e-05
		2873.5	1.29342e-05
		2875.25	1.28055e-05
		2877	1.2675e-05
		2878.75	1.25425e-05
		2880.5	1.24082e-05
		2882.25	1.22721e-05
		2884	1.21342e-05
		2885.75	1.19946e-05
		2887.5	1.18533e-05
		2889.25	1.17104e-05
		2891	1.1566e-05
		2892.75	1.14201e-05
		2894.5	1.12728e-05
		2896.25	1.11241e-05
		2898	1.09742e-05
		2899.75	1.0823e-05
		2901.5	1.06708e-05
		2903.25	1.05175e-05
		2905	1.03626e-05
		2906.75	1.02076e-05
		2908.5	1.00518e-05
		2910.25	9.89527e-06
		2912	9.73814e-06
		2913.75	9.58049e-06
		2915.5	9.42241e-06
		2917.25	9.26398e-06
		2919	9.10531e-06
		2920.75	8.94647e-06
		2922.5	8.78757e-06
		2924.25	8.62869e-06
		2926	8.46993e-06
		2927.75	8.31137e-06
		2929.5	8.15311e-06
		2931.25	7.99524e-06
		2933	7.8371e-06
		2934.75	7.68033e-06
		2936.5	7.5242e-06
		2938.25	7.36879e-06
		2940	7.21419e-06
		2941.75	7.06048e-06
		2943.5	6.90773e-06
		2945.25	6.75603e-06
		2947	6.60475e-06
		2948.75	6.45542e-06
		2950.5	6.30734e-06
		2952.25	6.16061e-06
		2954	6.01527e-06
		2955.75	5.87139e-06
		2957.5	5.72904e-06
		2959.25	5.58828e-06
		2961	5.44916e-06
		2962.75	5.31173e-06
		2964.5	5.17605e-06
		2966.25	5.04216e-06
		2968	4.91011e-06
		2969.75	4.77994e-06
		2971.5	4.6517e-06
		2973.25	4.52541e-06
		2975	4.40111e-06
		2976.75	4.27883e-06
		2978.5	4.15861e-06
		2980.25	4.04046e-06
		2982	3.92441e-06
		2983.75	3.80979e-06
		2985.5	3.69804e-06
		2987.25	3.58844e-06
		2989	3.481e-06
		2990.75	3.37573e-06
		2992.5	3.27263e-06
		2994.25	3.17171e-06
		2996	3.07296e-06
		2997.75	2.9764e-06
		2999.5	2.88201e-06
		3001.25	2.78908e-06
		3003	2.69909e-06
		3004.75	2.61125e-06
		3006.5	2.52554e-06
		3008.25	2.44196e-06
		3010	2.36127e-06
		3011.75	2.28198e-06
		3013.5	2.20476e-06
		3015.25	2.1296e-06
		3017	2.05649e-06
		3018.75	1.98539e-06
		3020.5	1.91629e-06
		3022.25	1.84916e-06
		3024	1.78397e-06
		3025.75	1.7207e-06
		3027.5	1.65931e-06
		3029.25	1.59907e-06
		3031	1.54142e-06
		3032.75	1.48558e-06
		3034.5	1.4315e-06
		3036.25	1.37915e-06
		3038	1.32852e-06
		3039.75	1.27956e-06
		3041.5	1.23224e-06
		3043.25	1.18653e-06
		3045	1.1424e-06
		3046.75	1.09981e-06
		3048.5	1.05875e-06
		3050.25	1.01916e-06
		3052	9.81031e-07
		3053.75	9.44321e-07
		3055.5	9.09002e-07
		3057.25	8.75044e-07
		3059	8.42418e-07
		3060.75	8.10356e-07
		3062.5	7.80353e-07
		3064.25	7.51594e-07
		3066	7.24054e-07
		3067.75	6.97706e-07
		3069.5	6.72527e-07
		3071.25	6.48492e-07
		3073	6.25578e-07
		3074.75	6.03764e-07
		3076.5	5.8303e-07
		3078.25	5.63355e-07
		3080	5.44722e-07
		3081.75	5.27113e-07
		3083.5	5.10513e-07
		3085.25	4.94906e-07
		3087	4.80279e-07
		3088.75	4.66621e-07
		3090.5	4.5392e-07
		3092.25	4.42166e-07
		3094	4.31352e-07
		3095.75	4.21471e-07
		3097.5	4.12517e-07
		3099.25	4.04486e-07
		3101	3.97375e-07
		3102.75	3.91183e-07
		3104.5	3.85909e-07
		3106.25	3.81555e-07
		3108	3.78123e-07
		3109.75	3.75617e-07
		3111.5	3.74042e-07
		3113.25	3.73404e-07
		3115	3.7371e-07
		3116.75	3.74289e-07
		3118.5	3.76579e-07
		3120.25	3.79836e-07
		3122	3.84073e-07
		3123.75	3.89302e-07
		3125.5	3.95539e-07
		3127.25	4.02797e-07
		3129	4.11092e-07
		3130.75	4.20441e-07
		3132.5	4.30861e-07
		3134.25	4.4237e-07
		3136	4.54985e-07
		3137.75	4.68725e-07
		3139.5	4.83608e-07
		3141.25	4.99653e-07
		3143	5.16878e-07
		3144.75	5.35304e-07
		3146.5	5.54947e-07
		3148.25	5.75827e-07
		3150	5.97962e-07
		3151.75	6.21368e-07
		3153.5	6.46063e-07
		3155.25	6.72064e-07
		3157	6.99384e-07
		3158.75	7.28039e-07
		3160.5	7.58041e-07
		3162.25	7.89402e-07
		3164	8.22133e-07
		3165.75	8.56242e-07
		3167.5	8.91737e-07
		3169.25	9.28623e-07
		3171	9.66903e-07
		3172.75	1.00658e-06
		3174.5	1.04765e-06
		3176.25	1.09011e-06
		3178	1.13396e-06
		3179.75	1.17918e-06
		3181.5	1.22577e-06
		3183.25	1.27371e-06
		3185	1.32299e-06
		3186.75	1.37359e-06
		3188.5	1.42547e-06
		3190.25	1.47863e-06
		3192	1.53302e-06
		3193.75	1.58861e-06
		3195.5	1.64464e-06
		3197.25	1.7026e-06
		3199	1.76164e-06
		3200.75	1.82172e-06
		3202.5	1.88278e-06
		3204.25	1.94477e-06
		3206	2.00764e-06
		3207.75	2.07132e-06
		3209.5	2.13575e-06
		3211.25	2.20086e-06
		3213	2.26659e-06
		3214.75	2.33286e-06
		3216.5	2.39959e-06
		3218.25	2.4667e-06
		3220	2.53411e-06
		3221.75	2.60174e-06
		3223.5	2.66949e-06
		3225.25	2.73728e-06
		3227	2.80501e-06
		3228.75	2.87258e-06
		3230.5	2.9399e-06
		3232.25	3.00687e-06
		3234	3.07339e-06
		3235.75	3.13936e-06
		3237.5	3.20467e-06
		3239.25	3.26923e-06
		3241	3.33292e-06
		3242.75	3.39564e-06
		3244.5	3.45728e-06
		3246.25	3.51701e-06
		3248	3.57625e-06
		3249.75	3.63409e-06
		3251.5	3.69045e-06
		3253.25	3.74522e-06
		3255	3.79831e-06
		3256.75	3.84961e-06
		3258.5	3.89904e-06
		3260.25	3.94649e-06
		3262	3.99189e-06
		3263.75	4.03515e-06
		3265.5	4.07618e-06
		3267.25	4.11491e-06
		3269	4.15052e-06
		3270.75	4.18446e-06
		3272.5	4.21588e-06
		3274.25	4.24472e-06
		3276	4.27093e-06
		3277.75	4.29445e-06
		3279.5	4.31523e-06
		3281.25	4.33324e-06
		3283	4.34844e-06
		3284.75	4.36079e-06
		3286.5	4.37027e-06
		3288.25	4.37687e-06
		3290	4.38057e-06
		3291.75	4.38136e-06
		3293.5	4.37923e-06
		3295.25	4.3742e-06
		3297	4.36627e-06
		3298.75	4.35546e-06
		3300.5	4.34179e-06
		3302.25	4.32529e-06
		3304	4.30598e-06
		3305.75	4.28391e-06
		3307.5	4.25911e-06
		3309.25	4.23165e-06
		3311	4.20156e-06
		3312.75	4.16892e-06
		3314.5	4.13378e-06
		3316.25	4.0962e-06
		3318	4.05627e-06
		3319.75	4.01406e-06
		3321.5	3.96964e-06
		3323.25	3.9231e-06
		3325	3.87453e-06
		3326.75	3.82329e-06
		3328.5	3.77095e-06
		3330.25	3.71613e-06
		3332	3.6604e-06
		3333.75	3.6031e-06
		3335.5	3.54433e-06
		3337.25	3.48421e-06
		3339	3.42282e-06
		3340.75	3.36027e-06
		3342.5	3.29667e-06
		3344.25	3.23212e-06
		3346	3.16673e-06
		3347.75	3.10059e-06
		3349.5	3.03381e-06
		3351.25	2.96649e-06
		3353	2.89873e-06
		3354.75	2.83063e-06
		3356.5	2.7623e-06
		3358.25	2.69382e-06
		3360	2.62528e-06
		3361.75	2.55679e-06
		3363.5	2.48842e-06
		3365.25	2.42027e-06
		3367	2.35242e-06
		3368.75	2.28495e-06
		3370.5	2.21793e-06
		3372.25	2.15145e-06
		3374	2.08557e-06
		3375.75	2.02036e-06
		3377.5	1.95588e-06
		3379.25	1.8922e-06
		3381	1.82938e-06
		3382.75	1.76746e-06
		3384.5	1.70651e-06
		3386.25	1.64655e-06
		3388	1.58765e-06
		3389.75	1.52983e-06
		3391.5	1.47314e-06
		3393.25	1.4176e-06
		3395	1.36325e-06
		3396.75	1.31011e-06
		3398.5	1.2582e-06
		3400.25	1.20755e-06
		3402	1.15816e-06
		3403.75	1.11005e-06
		3405.5	1.06323e-06
		3407.25	1.01771e-06
		3409	9.73491e-07
		3410.75	9.30571e-07
		3412.5	8.8895e-07
		3414.25	8.48626e-07
		3416	8.09591e-07
		3417.75	7.71837e-07
		3419.5	7.35354e-07
		3421.25	7.00129e-07
		3423	6.66147e-07
		3424.75	6.33392e-07
		3426.5	6.01847e-07
		3428.25	5.71492e-07
		3430	5.42307e-07
		3431.75	5.1427e-07
		3433.5	4.87357e-07
		3435.25	4.61545e-07
		3437	4.36809e-07
		3438.75	4.13123e-07
		3440.5	3.90461e-07
		3442.25	3.68797e-07
		3444	3.48103e-07
		3445.75	3.28351e-07
		3447.5	3.09514e-07
		3449.25	2.91563e-07
		3451	2.7447e-07
		3452.75	2.58207e-07
		3454.5	2.42746e-07
		3456.25	2.28059e-07
		3458	2.14118e-07
		3459.75	2.00895e-07
		3461.5	1.88363e-07
		3463.25	1.76496e-07
		3465	1.65265e-07
		3466.75	1.54647e-07
		3468.5	1.44614e-07
		3470.25	1.35142e-07
		3472	1.26206e-07
		3473.75	1.17783e-07
		3475.5	1.09849e-07
		3477.25	1.02381e-07
		3479	9.53569e-08
		3480.75	8.87557e-08
		3482.5	8.25565e-08
		3484.25	7.67391e-08
		3486	7.12841e-08
		3487.75	6.61729e-08
		3489.5	6.13871e-08
		3491.25	5.69096e-08
		3493	5.27236e-08
		3494.75	4.88129e-08
		3496.5	4.51621e-08
		3498.25	4.17566e-08
[truncated: 1 more rows]

## Sheet: PlotDat3
Source sheet	ZirconData	0	0	87.5	0	0	0
Plot name	ProbDens3	1.75	0	175	0	3498.25	0
Plot Type	16	3.5	0	175	772
1st free col	9	5.25	0	87.5	772
Sigma Level	2	7	0	87.5	0
Absolute Errs	TRUE	8.75	0	ErrBox	ErrBox
Symbol Type	1	10.5	0	175	0
Inverse Plot	FALSE	12.25	0	262.5	0
Color Plot	TRUE	14	0	262.5	552
3D plot	FALSE	15.75	0	175	552
Linear	FALSE	17.5	0	175	0
Data Range	AA2:AB1480	19.25	0	ErrBox	ErrBox
Filled Symbols	FALSE	21	0	262.5	0
ConcAge	FALSE	22.75	0	350	0
ConcSwap	TRUE	24.5	0	350	20
1st Symbol-row	1	26.25	0	262.5	20
		28	0	262.5	0
		29.75	0	ErrBox	ErrBox
		31.5	0	350	0
		33.25	0	437.5	0
		35	0	437.5	23
		36.75	0	350	23
		38.5	0	350	0
		40.25	0	ErrBox	ErrBox
		42	0	437.5	0
		43.75	0	525	0
		45.5	0	525	17
		47.25	0	437.5	17
		49	0	437.5	0
		50.75	0	ErrBox	ErrBox
		52.5	0	525	0
		54.25	0	612.5	0
		56	0	612.5	4
		57.75	0	525	4
		59.5	0	525	0
		61.25	0	ErrBox	ErrBox
		63	0	612.5	0
		64.75	0	700	0
		66.5	0	700	2
		68.25	0	612.5	2
		70	0	612.5	0
		71.75	0	ErrBox	ErrBox
		73.5	0	700	0
		75.25	0	787.5	0
		77	0	787.5	6
		78.75	0	700	6
		80.5	0	700	0
		82.25	0	ErrBox	ErrBox
		84	2.39238e-08	787.5	0
		85.75	1.11155e-06	875	0
		87.5	1.73612e-05	875	4
		89.25	9.12045e-05	787.5	4
		91	0.000162915	787.5	0
		92.75	0.000127116	ErrBox	ErrBox
		94.5	0.000292005	875	0
		96.25	0.0016624	962.5	0
		98	0.00660791	962.5	2
		99.75	0.0158615	875	2
		101.5	0.0260619	875	0
		103.25	0.024976	ErrBox	ErrBox
		105	0.014639	962.5	0
		106.75	0.00715668	1050	0
		108.5	0.00425324	1050	6
		110.25	0.00314528	962.5	6
		112	0.00167078	962.5	0
		113.75	0.00092729	ErrBox	ErrBox
		115.5	0.000821377	1050	0
		117.25	0.000924052	1137.5	0
		119	0.00116791	1137.5	5
		120.75	0.00226968	1050	5
		122.5	0.00339413	1050	0
		124.25	0.00318424	ErrBox	ErrBox
		126	0.00235141	1137.5	0
		127.75	0.00180942	1225	0
		129.5	0.00140505	1225	4
		131.25	0.00097926	1137.5	4
		133	0.000617525	1137.5	0
		134.75	0.000490869	ErrBox	ErrBox
		136.5	0.000795071	1225	0
		138.25	0.00104926	1312.5	0
		140	0.000951876	1312.5	5
		141.75	0.000882319	1225	5
		143.5	0.00123452	1225	0
		145.25	0.00293681	ErrBox	ErrBox
		147	0.00686492	1312.5	0
		148.75	0.0117608	1400	0
		150.5	0.0133107	1400	4
		152.25	0.0118477	1312.5	4
		154	0.00960203	1312.5	0
		155.75	0.00743754	ErrBox	ErrBox
		157.5	0.00668409	1487.5	0
		159.25	0.0078492	1575	0
		161	0.0100153	1575	3
		162.75	0.0122935	1487.5	3
		164.5	0.0137756	1487.5	0
		166.25	0.0140799	ErrBox	ErrBox
		168	0.0121861	1575	0
		169.75	0.00971107	1662.5	0
		171.5	0.00765289	1662.5	7
		173.25	0.00579101	1575	7
		175	0.0044653	1575	0
		176.75	0.00388547	ErrBox	ErrBox
		178.5	0.00334017	1662.5	0
		180.25	0.00277573	1750	0
		182	0.0022985	1750	6
		183.75	0.00195752	1662.5	6
		185.5	0.00168158	1662.5	0
		187.25	0.00138862	ErrBox	ErrBox
		189	0.00121038	1750	0
		190.75	0.00118765	1837.5	0
		192.5	0.00120607	1837.5	5
		194.25	0.00127644	1750	5
		196	0.0016705	1750	0
		197.75	0.00259256	ErrBox	ErrBox
		199.5	0.00388979	1837.5	0
		201.25	0.00524529	1925	0
		203	0.0066998	1925	5
		204.75	0.0085003	1837.5	5
		206.5	0.0110307	1837.5	0
		208.25	0.0135977	ErrBox	ErrBox
		210	0.014741	1925	0
		211.75	0.014503	2012.5	0
		213.5	0.014049	2012.5	1
		215.25	0.0138677	1925	1
		217	0.0132414	1925	0
		218.75	0.0113449	ErrBox	ErrBox
		220.5	0.00828393	2012.5	0
		222.25	0.00522728	2100	0
		224	0.00333436	2100	3
		225.75	0.00269451	2012.5	3
		227.5	0.00277207	2012.5	0
		229.25	0.00296661	ErrBox	ErrBox
		231	0.00291158	2100	0
		232.75	0.00263108	2187.5	0
		234.5	0.00226635	2187.5	1
		236.25	0.0018698	2100	1
		238	0.00148575	2100	0
		239.75	0.00118981	ErrBox	ErrBox
		241.5	0.00102312	2275	0
		243.25	0.000986499	2362.5	0
		245	0.00104576	2362.5	5
		246.75	0.00116219	2275	5
		248.5	0.00132549	2275	0
		250.25	0.00151329	ErrBox	ErrBox
		252	0.0016604	2362.5	0
		253.75	0.00170892	2450	0
		255.5	0.00164281	2450	1
		257.25	0.00146478	2362.5	1
		259	0.00119508	2362.5	0
		260.75	0.000888391	ErrBox	ErrBox
		262.5	0.000614389	2450	0
		264.25	0.000419249	2537.5	0
		266	0.000310457	2537.5	2
		267.75	0.000267625	2450	2
		269.5	0.000259795	2450	0
		271.25	0.000259732	ErrBox	ErrBox
		273	0.000253177	2537.5	0
		274.75	0.000238947	2625	0
		276.5	0.000220639	2625	5
		278.25	0.000199084	2537.5	5
		280	0.000172481	2537.5	0
		281.75	0.000140911	ErrBox	ErrBox
		283.5	0.000108436	2625	0
		285.25	8.0825e-05	2712.5	0
		287	6.20677e-05	2712.5	4
		288.75	5.27779e-05	2625	4
		290.5	5.09028e-05	2625	0
		292.25	5.33922e-05	ErrBox	ErrBox
		294	5.7511e-05	2712.5	0
		295.75	6.13944e-05	2800	0
		297.5	6.40741e-05	2800	2
		299.25	6.52948e-05	2712.5	2
		301	6.53465e-05	2712.5	0
		302.75	6.49517e-05	ErrBox	ErrBox
		304.5	6.51274e-05	2800	0
		306.25	6.69678e-05	2887.5	0
		308	7.13156e-05	2887.5	1
		309.75	7.84514e-05	2800	1
		311.5	8.79928e-05	2800	0
		313.25	9.91133e-05	ErrBox	ErrBox
		315	0.000111049	2887.5	0
		316.75	0.000123633	2975	0
		318.5	0.000137653	2975	1
		320.25	0.000154901	2887.5	1
		322	0.00017781	2887.5	0
		323.75	0.00020833	ErrBox	ErrBox
		325.5	0.000245759	3237.5	0
		327.25	0.00028438	3325	0
		329	0.000313431	3325	1
		330.75	0.000321586	3237.5	1
		332.5	0.000304337	3237.5	0
		334.25	0.000268482	ErrBox	ErrBox
		336	0.00022878
		337.75	0.000198218
		339.5	0.000179459
		341.25	0.000164878
		343	0.000145247
		344.75	0.000118649
		346.5	9.12987e-05
		348.25	7.1305e-05
		350	6.30844e-05
		351.75	6.6623e-05
		353.5	7.94443e-05
		355.25	9.81818e-05
		357	0.000119346
		358.75	0.000140007
		360.5	0.000158276
		362.25	0.000172972
		364	0.000182634
		365.75	0.000185178
		367.5	0.000178945
		369.25	0.000164299
		371	0.000144083
		372.75	0.000122397
		374.5	0.000102728
		376.25	8.68545e-05
		378	7.4918e-05
		379.75	6.61982e-05
		381.5	5.99513e-05
		383.25	5.59881e-05
		385	5.48924e-05
		386.75	5.78574e-05
		388.5	6.61774e-05
		390.25	8.05621e-05
		392	0.000100579
		393.75	0.000124554
		395.5	0.000150061
		397.25	0.00017483
		399	0.000197583
		400.75	0.000218295
		402.5	0.000237631
		404.25	0.000255852
		406	0.0002719
		407.75	0.000283327
		409.5	0.000287244
		411.25	0.000281821
		413	0.00026746
		414.75	0.00024704
		416.5	0.000225141
		418.25	0.000206762
		420	0.00019608
		421.75	0.000195561
		423.5	0.000205506
		425.25	0.000223987
		427	0.000247255
		428.75	0.000270642
		430.5	0.000289776
		432.25	0.000301699
		434	0.000305499
		435.75	0.000302247
		437.5	0.000294355
		439.25	0.00028466
		441	0.000275552
		442.75	0.000268379
		444.5	0.000263215
		446.25	0.000259002
		448	0.000254005
		449.75	0.000246411
		451.5	0.000234913
		453.25	0.00021908
		455	0.000199433
		456.75	0.000177258
		458.5	0.000154258
		460.25	0.000132181
		462	0.000112496
		463.75	9.61762e-05
		465.5	8.35882e-05
		467.25	7.45013e-05
		469	6.82217e-05
		470.75	6.38295e-05
		472.5	6.04567e-05
		474.25	5.75372e-05
		476	5.49484e-05
		477.75	5.30033e-05
		479.5	5.2294e-05
		481.25	5.34457e-05
		483	5.68454e-05
		484.75	6.2442e-05
		486.5	6.96716e-05
		488.25	7.75354e-05
		490	8.4818e-05
		491.75	9.03673e-05
		493.5	9.33835e-05
		495.25	9.36103e-05
		497	9.13796e-05
		498.75	8.75128e-05
		500.5	8.31103e-05
		502.25	7.93128e-05
		504	7.70993e-05
		505.75	7.71726e-05
		507.5	7.99302e-05
		509.25	8.54986e-05
		511	9.37723e-05
		512.75	0.000104413
		514.5	0.000116776
		516.25	0.000129787
		518	0.000141861
		519.75	0.000151018
		521.5	0.000155282
		523.25	0.000153307
		525	0.000144957
		526.75	0.000131523
		528.5	0.000115369
		530.25	9.91565e-05
		532	8.50063e-05
		533.75	7.3999e-05
		535.5	6.61613e-05
		537.25	6.08247e-05
		539	5.70916e-05
		540.75	5.41777e-05
		542.5	5.15461e-05
		544.25	4.8878e-05
		546	4.59833e-05
		547.75	4.27286e-05
		549.5	3.90283e-05
		551.25	3.48601e-05
		553	3.03016e-05
		554.75	2.55289e-05
		556.5	2.0798e-05
		558.25	1.63921e-05
		560	1.25735e-05
		561.75	9.5483e-06
		563.5	7.4545e-06
		565.25	6.36827e-06
		567	6.3203e-06
		568.75	7.30942e-06
		570.5	9.3049e-06
		572.25	1.22393e-05
		574	1.59886e-05
		575.75	2.03616e-05
		577.5	2.5098e-05
		579.25	2.9893e-05
		581	3.4431e-05
		582.75	3.84362e-05
		584.5	4.17164e-05
		586.25	4.41879e-05
		588	4.58751e-05
		589.75	4.68876e-05
		591.5	4.73809e-05
		593.25	4.75223e-05
		595	4.74688e-05
		596.75	4.73627e-05
		598.5	4.73385e-05
		600.25	4.75297e-05
		602	4.80632e-05
		603.75	4.90364e-05
		605.5	5.04823e-05
		607.25	5.23345e-05
		609	5.441e-05
		610.75	5.64182e-05
		612.5	5.80021e-05
		614.25	5.87999e-05
		616	5.85136e-05
		617.75	5.69648e-05
		619.5	5.41264e-05
		621.25	5.0122e-05
		623	4.51983e-05
		624.75	3.96778e-05
		626.5	3.39084e-05
		628.25	2.82136e-05
		630	2.2861e-05
		631.75	1.80424e-05
		633.5	1.3871e-05
		635.25	1.03881e-05
		637	7.57827e-06
		638.75	5.38287e-06
		640.5	3.7228e-06
		642.25	2.50559e-06
		644	1.6405e-06
		645.75	1.04451e-06
		647.5	6.46544e-07
		649.25	3.89036e-07
		651	2.2761e-07
		652.75	1.29601e-07
		654.5	7.19916e-08
		656.25	3.8906e-08
		658	2.10918e-08
		659.75	1.16168e-08
		661.5	6.78299e-09
		663.25	4.44421e-09
		665	3.40341e-09
		666.75	2.56353e-09
		668.5	2.76147e-09
		670.25	2.97353e-09
		672	3.20061e-09
		673.75	3.44368e-09
		675.5	3.70376e-09
		677.25	3.98191e-09
		679	4.27928e-09
		680.75	4.59704e-09
		682.5	4.93647e-09
		684.25	6.58162e-09
		686	9.01781e-09
		687.75	1.20204e-08
		689.5	1.79544e-08
		691.25	2.71464e-08
		693	4.42346e-08
		694.75	7.30601e-08
		696.5	1.20075e-07
		698.25	1.97715e-07
		700	3.20956e-07
		701.75	5.12765e-07
		703.5	8.0389e-07
		705.25	1.2348e-06
		707	1.85689e-06
		708.75	2.73306e-06
		710.5	3.93728e-06
		712.25	5.5528e-06
		714	7.66858e-06
		715.75	1.03736e-05
		717.5	1.37494e-05
		719.25	1.78582e-05
		721	2.27296e-05
		722.75	2.83453e-05
		724.5	3.46263e-05
		726.25	4.14176e-05
		728	4.84828e-05
		729.75	5.55075e-05
		731.5	6.21163e-05
		733.25	6.79046e-05
		735	7.24843e-05
		736.75	7.55371e-05
		738.5	7.68644e-05
		740.25	7.64321e-05
		742	7.43891e-05
		743.75	7.10604e-05
		745.5	6.69134e-05
		747.25	6.24998e-05
		749	5.83822e-05
		750.75	5.50625e-05
		752.5	5.29196e-05
		754.25	5.21647e-05
		756	5.28226e-05
		757.75	5.47386e-05
		759.5	5.76062e-05
		761.25	6.10114e-05
		763	6.44863e-05
		764.75	6.75639e-05
		766.5	6.98272e-05
		768.25	7.09503e-05
		770	7.07274e-05
		771.75	6.9083e-05
		773.5	6.60667e-05
		775.25	6.18406e-05
		777	5.66478e-05
		778.75	5.07847e-05
		780.5	4.45645e-05
		782.25	3.82877e-05
		784	3.22192e-05
		785.75	2.65702e-05
		787.5	2.14905e-05
		789.25	1.70699e-05
		791	1.33463e-05
		792.75	1.03107e-05
		794.5	7.92532e-06
		796.25	6.12862e-06
		798	4.85487e-06
		799.75	4.03485e-06
		801.5	3.60705e-06
		803.25	3.5188e-06
		805	3.72806e-06
		806.75	4.20289e-06
		808.5	4.91969e-06
		810.25	5.86075e-06
		812	7.01164e-06
		813.75	8.35874e-06
		815.5	9.88738e-06
		817.25	1.15803e-05
		819	1.34192e-05
		820.75	1.53818e-05
		822.5	1.74454e-05
		824.25	1.95903e-05
		826	2.17946e-05
		827.75	2.40403e-05
		829.5	2.63143e-05
		831.25	2.86034e-05
		833	3.0896e-05
		834.75	3.31804e-05
		836.5	3.54407e-05
		838.25	3.76607e-05
		840	3.98228e-05
		841.75	4.19119e-05
		843.5	4.39208e-05
		845.25	4.58545e-05
		847	4.77341e-05
		848.75	4.95959e-05
		850.5	5.14816e-05
		852.25	5.34278e-05
		854	5.54446e-05
		855.75	5.74973e-05
		857.5	5.94859e-05
		859.25	6.12496e-05
		861	6.25743e-05
		862.75	6.32237e-05
		864.5	6.29808e-05
		866.25	6.16932e-05
		868	5.93107e-05
		869.75	5.59045e-05
		871.5	5.16631e-05
		873.25	4.6865e-05
		875	4.18359e-05
		876.75	3.68992e-05
		878.5	3.2333e-05
		880.25	2.83402e-05
		882	2.50362e-05
		883.75	2.24538e-05
		885.5	2.05584e-05
		887.25	1.9271e-05
		889	1.84873e-05
		890.75	1.80992e-05
		892.5	1.80026e-05
		894.25	1.81092e-05
		896	1.83429e-05
		897.75	1.86463e-05
		899.5	1.89704e-05
		901.25	1.92799e-05
		903	1.9548e-05
		904.75	1.97546e-05
		906.5	1.9889e-05
		908.25	1.99434e-05
		910	1.99192e-05
		911.75	1.98212e-05
		913.5	1.96605e-05
		915.25	1.94536e-05
		917	1.92217e-05
		918.75	1.89902e-05
		920.5	1.87878e-05
		922.25	1.86464e-05
		924	1.85995e-05
		925.75	1.86819e-05
		927.5	1.89258e-05
		929.25	1.93642e-05
		931	2.00231e-05
		932.75	2.09246e-05
		934.5	2.20844e-05
		936.25	2.35069e-05
		938	2.5187e-05
		939.75	2.71078e-05
		941.5	2.92402e-05
		943.25	3.15436e-05
		945	3.39667e-05
		946.75	3.64494e-05
		948.5	3.89266e-05
		950.25	4.13297e-05
		952	4.35916e-05
		953.75	4.56529e-05
		955.5	4.74619e-05
		957.25	4.898e-05
		959	5.0185e-05
		960.75	5.10716e-05
		962.5	5.16493e-05
		964.25	5.1945e-05
		966	5.19979e-05
		967.75	5.18568e-05
		969.5	5.15758e-05
		971.25	5.12101e-05
		973	5.0812e-05
		974.75	5.04246e-05
		976.5	5.00823e-05
		978.25	4.98066e-05
		980	4.96051e-05
		981.75	4.94725e-05
		983.5	4.93914e-05
		985.25	4.93351e-05
		987	4.92705e-05
		988.75	4.91613e-05
		990.5	4.89714e-05
		992.25	4.86706e-05
		994	4.82329e-05
		995.75	4.76424e-05
		997.5	4.68935e-05
		999.25	4.5989e-05
		1001	4.49434e-05
		1002.75	4.37788e-05
		1004.5	4.25238e-05
		1006.25	4.1211e-05
		1008	3.98746e-05
		1009.75	3.85483e-05
		1011.5	3.72632e-05
		1013.25	3.60459e-05
		1015	3.49178e-05
		1016.75	3.38942e-05
		1018.5	3.29847e-05
		1020.25	3.2193e-05
		1022	3.15176e-05
		1023.75	3.09546e-05
		1025.5	3.04951e-05
		1027.25	3.01291e-05
		1029	2.98455e-05
		1030.75	2.9633e-05
		1032.5	2.94805e-05
		1034.25	2.93778e-05
		1036	2.93161e-05
		1037.75	2.92874e-05
		1039.5	2.92853e-05
		1041.25	2.93045e-05
		1043	2.93409e-05
		1044.75	2.93906e-05
		1046.5	2.94526e-05
		1048.25	2.95243e-05
		1050	2.96044e-05
		1051.75	2.9692e-05
		1053.5	2.97864e-05
		1055.25	2.98872e-05
		1057	2.99939e-05
		1058.75	3.01061e-05
		1060.5	3.02231e-05
		1062.25	3.03459e-05
		1064	3.04733e-05
		1065.75	3.0605e-05
		1067.5	3.07405e-05
		1069.25	3.08797e-05
		1071	3.10221e-05
		1072.75	3.11672e-05
		1074.5	3.13148e-05
		1076.25	3.14643e-05
		1078	3.16153e-05
		1079.75	3.17675e-05
		1081.5	3.19204e-05
		1083.25	3.20737e-05
		1085	3.22268e-05
		1086.75	3.23796e-05
		1088.5	3.25316e-05
		1090.25	3.26826e-05
		1092	3.28328e-05
		1093.75	3.29807e-05
		1095.5	3.31267e-05
		1097.25	3.32705e-05
		1099	3.34119e-05
		1100.75	3.35508e-05
		1102.5	3.36869e-05
		1104.25	3.38202e-05
		1106	3.39505e-05
		1107.75	3.40777e-05
		1109.5	3.42017e-05
		1111.25	3.43224e-05
		1113	3.44399e-05
		1114.75	3.4554e-05
		1116.5	3.46648e-05
		1118.25	3.47722e-05
		1120	3.48762e-05
		1121.75	3.4977e-05
		1123.5	3.50743e-05
		1125.25	3.51684e-05
		1127	3.52593e-05
		1128.75	3.5347e-05
		1130.5	3.54315e-05
		1132.25	3.55129e-05
		1134	3.55913e-05
		1135.75	3.56674e-05
		1137.5	3.57399e-05
		1139.25	3.58096e-05
		1141	3.58766e-05
		1142.75	3.59409e-05
		1144.5	3.60025e-05
		1146.25	3.60609e-05
		1148	3.61176e-05
		1149.75	3.61719e-05
		1151.5	3.62237e-05
		1153.25	3.62733e-05
		1155	3.63206e-05
		1156.75	3.63664e-05
		1158.5	3.64094e-05
		1160.25	3.64504e-05
		1162	3.64893e-05
		1163.75	3.65262e-05
		1165.5	3.65612e-05
		1167.25	3.65943e-05
		1169	3.66256e-05
		1170.75	3.6655e-05
		1172.5	3.66826e-05
		1174.25	3.67085e-05
		1176	3.67326e-05
		1177.75	3.67549e-05
		1179.5	3.67755e-05
		1181.25	3.67945e-05
		1183	3.68116e-05
		1184.75	3.68271e-05
		1186.5	3.68409e-05
		1188.25	3.68529e-05
		1190	3.68639e-05
		1191.75	3.68725e-05
		1193.5	3.68794e-05
		1195.25	3.68844e-05
		1197	3.68876e-05
		1198.75	3.6889e-05
		1200.5	3.68885e-05
		1202.25	3.68861e-05
		1204	3.68818e-05
		1205.75	3.68754e-05
		1207.5	3.6867e-05
		1209.25	3.68566e-05
		1211	3.6844e-05
		1212.75	3.68292e-05
		1214.5	3.68123e-05
		1216.25	3.6793e-05
		1218	3.67714e-05
		1219.75	3.67474e-05
		1221.5	3.67209e-05
		1223.25	3.6692e-05
		1225	3.66605e-05
		1226.75	3.66263e-05
		1228.5	3.65902e-05
		1230.25	3.65506e-05
		1232	3.65083e-05
		1233.75	3.64631e-05
		1235.5	3.6415e-05
		1237.25	3.63639e-05
		1239	3.63098e-05
		1240.75	3.62527e-05
		1242.5	3.61923e-05
		1244.25	3.61288e-05
		1246	3.60621e-05
		1247.75	3.59921e-05
		1249.5	3.59187e-05
		1251.25	3.5842e-05
		1253	3.57618e-05
		1254.75	3.56789e-05
		1256.5	3.55918e-05
		1258.25	3.55013e-05
		1260	3.54072e-05
		1261.75	3.53096e-05
		1263.5	3.52083e-05
		1265.25	3.51034e-05
		1267	3.4995e-05
		1268.75	3.48828e-05
		1270.5	3.47671e-05
		1272.25	3.46477e-05
		1274	3.45253e-05
		1275.75	3.43987e-05
		1277.5	3.42684e-05
		1279.25	3.41346e-05
		1281	3.39971e-05
		1282.75	3.38561e-05
		1284.5	3.37116e-05
		1286.25	3.35635e-05
		1288	3.3412e-05
		1289.75	3.3257e-05
		1291.5	3.30987e-05
		1293.25	3.2937e-05
		1295	3.2772e-05
		1296.75	3.26038e-05
		1298.5	3.24338e-05
		1300.25	3.22595e-05
		1302	3.20821e-05
		1303.75	3.19018e-05
		1305.5	3.17186e-05
		1307.25	3.15327e-05
		1309	3.13448e-05
		1310.75	3.11536e-05
		1312.5	3.09607e-05
		1314.25	3.07647e-05
		1316	3.05664e-05
		1317.75	3.03659e-05
		1319.5	3.01634e-05
		1321.25	2.99589e-05
		1323	2.97525e-05
		1324.75	2.95444e-05
		1326.5	2.93355e-05
		1328.25	2.91244e-05
		1330	2.89119e-05
		1331.75	2.86982e-05
		1333.5	2.84842e-05
		1335.25	2.82685e-05
		1337	2.8052e-05
		1338.75	2.78349e-05
		1340.5	2.76179e-05
		1342.25	2.73999e-05
		1344	2.71816e-05
		1345.75	2.69632e-05
		1347.5	2.67448e-05
		1349.25	2.65267e-05
		1351	2.63088e-05
		1352.75	2.60914e-05
		1354.5	2.58747e-05
		1356.25	2.56587e-05
		1358	2.54436e-05
		1359.75	2.52296e-05
		1361.5	2.50168e-05
		1363.25	2.48047e-05
		1365	2.45948e-05
		1366.75	2.43866e-05
		1368.5	2.41801e-05
		1370.25	2.39756e-05
		1372	2.37731e-05
		1373.75	2.35728e-05
		1375.5	2.33749e-05
		1377.25	2.31788e-05
		1379	2.29861e-05
		1380.75	2.27961e-05
		1382.5	2.26091e-05
		1384.25	2.2425e-05
		1386	2.22441e-05
		1387.75	2.20665e-05
		1389.5	2.18923e-05
		1391.25	2.17217e-05
		1393	2.1554e-05
		1394.75	2.13909e-05
		1396.5	2.1231e-05
		1398.25	2.10758e-05
		1400	2.09247e-05
		1401.75	2.07779e-05
		1403.5	2.06347e-05
		1405.25	2.04967e-05
		1407	2.03639e-05
		1408.75	2.02352e-05
		1410.5	2.01111e-05
		1412.25	1.99919e-05
		1414	1.98776e-05
		1415.75	1.97684e-05
		1417.5	1.96643e-05
		1419.25	1.9566e-05
		1421	1.94724e-05
		1422.75	1.93848e-05
		1424.5	1.9302e-05
		1426.25	1.92248e-05
		1428	1.91538e-05
		1429.75	1.90878e-05
		1431.5	1.90276e-05
		1433.25	1.89731e-05
		1435	1.89244e-05
		1436.75	1.8881e-05
		1438.5	1.88442e-05
		1440.25	1.88135e-05
		1442	1.87887e-05
		1443.75	1.877e-05
		1445.5	1.87574e-05
		1447.25	1.87509e-05
		1449	1.87507e-05
		1450.75	1.87573e-05
		1452.5	1.87695e-05
		1454.25	1.8788e-05
		1456	1.88127e-05
		1457.75	1.88437e-05
		1459.5	1.8881e-05
		1461.25	1.89247e-05
		1463	1.89746e-05
		1464.75	1.90308e-05
		1466.5	1.90934e-05
		1468.25	1.91622e-05
		1470	1.92373e-05
		1471.75	1.93181e-05
		1473.5	1.94058e-05
		1475.25	1.94997e-05
		1477	1.95999e-05
		1478.75	1.97062e-05
		1480.5	1.98186e-05
		1482.25	1.99378e-05
		1484	2.00625e-05
		1485.75	2.01932e-05
		1487.5	2.03299e-05
		1489.25	2.04718e-05
		1491	2.06203e-05
		1492.75	2.07739e-05
		1494.5	2.09339e-05
		1496.25	2.10996e-05
		1498	2.12709e-05
		1499.75	2.14476e-05
		1501.5	2.16298e-05
		1503.25	2.18173e-05
		1505	2.20107e-05
		1506.75	2.22086e-05
		1508.5	2.24115e-05
		1510.25	2.26194e-05
		1512	2.28321e-05
		1513.75	2.30495e-05
		1515.5	2.32715e-05
		1517.25	2.34979e-05
		1519	2.37287e-05
		1520.75	2.39637e-05
		1522.5	2.42028e-05
		1524.25	2.44452e-05
		1526	2.46921e-05
		1527.75	2.49427e-05
		1529.5	2.51967e-05
		1531.25	2.54535e-05
		1533	2.57141e-05
		1534.75	2.59778e-05
		1536.5	2.62444e-05
		1538.25	2.65136e-05
		1540	2.67854e-05
		1541.75	2.70596e-05
		1543.5	2.7336e-05
		1545.25	2.76144e-05
		1547	2.78947e-05
		1548.75	2.81766e-05
		1550.5	2.846e-05
		1552.25	2.87441e-05
		1554	2.90299e-05
		1555.75	2.93174e-05
		1557.5	2.9605e-05
		1559.25	2.98932e-05
		1561	3.01817e-05
		1562.75	3.04704e-05
		1564.5	3.07591e-05
		1566.25	3.10476e-05
		1568	3.13357e-05
		1569.75	3.16233e-05
		1571.5	3.19101e-05
		1573.25	3.21959e-05
		1575	3.24806e-05
		1576.75	3.2764e-05
		1578.5	3.30459e-05
		1580.25	3.33261e-05
		1582	3.36044e-05
		1583.75	3.38807e-05
		1585.5	3.41548e-05
		1587.25	3.44265e-05
		1589	3.46949e-05
		1590.75	3.49614e-05
		1592.5	3.5225e-05
		1594.25	3.54855e-05
		1596	3.57429e-05
		1597.75	3.59968e-05
		1599.5	3.62473e-05
		1601.25	3.64941e-05
		1603	3.67378e-05
		1604.75	3.6977e-05
		1606.5	3.72121e-05
		1608.25	3.74432e-05
		1610	3.76692e-05
		1611.75	3.78915e-05
		1613.5	3.81093e-05
		1615.25	3.83225e-05
		1617	3.85309e-05
		1618.75	3.87344e-05
		1620.5	3.8933e-05
		1622.25	3.91266e-05
		1624	3.93158e-05
		1625.75	3.94992e-05
		1627.5	3.96773e-05
		1629.25	3.985e-05
		1631	4.00174e-05
		1632.75	4.01794e-05
		1634.5	4.03359e-05
		1636.25	4.04868e-05
		1638	4.06322e-05
		1639.75	4.0772e-05
		1641.5	4.09061e-05
		1643.25	4.10346e-05
		1645	4.11574e-05
		1646.75	4.12745e-05
		1648.5	4.13859e-05
		1650.25	4.14915e-05
		1652	4.15915e-05
		1653.75	4.16857e-05
		1655.5	4.17742e-05
		1657.25	4.1857e-05
		1659	4.19342e-05
		1660.75	4.20056e-05
		1662.5	4.20715e-05
		1664.25	4.21324e-05
		1666	4.21871e-05
		1667.75	4.22362e-05
		1669.5	4.22792e-05
		1671.25	4.23174e-05
		1673	4.23502e-05
		1674.75	4.23777e-05
		1676.5	4.23997e-05
		1678.25	4.24166e-05
		1680	4.24282e-05
		1681.75	4.24346e-05
		1683.5	4.24359e-05
		1685.25	4.24323e-05
		1687	4.24236e-05
		1688.75	4.241e-05
		1690.5	4.23916e-05
		1692.25	4.23685e-05
		1694	4.23406e-05
		1695.75	4.23082e-05
		1697.5	4.22712e-05
		1699.25	4.22297e-05
		1701	4.21839e-05
		1702.75	4.21337e-05
		1704.5	4.20793e-05
		1706.25	4.20201e-05
		1708	4.19576e-05
		1709.75	4.18904e-05
		1711.5	4.182e-05
		1713.25	4.17459e-05
		1715	4.16679e-05
		1716.75	4.15864e-05
		1718.5	4.15012e-05
		1720.25	4.14126e-05
		1722	4.13206e-05
		1723.75	4.12253e-05
		1725.5	4.11268e-05
		1727.25	4.10251e-05
		1729	4.09198e-05
		1730.75	4.08121e-05
		1732.5	4.07016e-05
		1734.25	4.05877e-05
		1736	4.04717e-05
		1737.75	4.03531e-05
		1739.5	4.02326e-05
		1741.25	4.01091e-05
		1743	3.99831e-05
		1744.75	3.98549e-05
		1746.5	3.97244e-05
		1748.25	3.95919e-05
		1750	3.94572e-05
		1751.75	3.93207e-05
		1753.5	3.91822e-05
		1755.25	3.90419e-05
		1757	3.88999e-05
		1758.75	3.87563e-05
		1760.5	3.8611e-05
		1762.25	3.84643e-05
		1764	3.83162e-05
		1765.75	3.81667e-05
		1767.5	3.8016e-05
		1769.25	3.78641e-05
		1771	3.77111e-05
		1772.75	3.75577e-05
		1774.5	3.74027e-05
		1776.25	3.72468e-05
		1778	3.70901e-05
		1779.75	3.69326e-05
		1781.5	3.67745e-05
		1783.25	3.66157e-05
		1785	3.64564e-05
		1786.75	3.62966e-05
		1788.5	3.61363e-05
		1790.25	3.59758e-05
		1792	3.58149e-05
		1793.75	3.56538e-05
		1795.5	3.54925e-05
		1797.25	3.53312e-05
		1799	3.51697e-05
		1800.75	3.50083e-05
		1802.5	3.4847e-05
		1804.25	3.46857e-05
		1806	3.45246e-05
		1807.75	3.43638e-05
		1809.5	3.42032e-05
		1811.25	3.40429e-05
		1813	3.3883e-05
		1814.75	3.37235e-05
		1816.5	3.35645e-05
		1818.25	3.34059e-05
		1820	3.32479e-05
		1821.75	3.30904e-05
		1823.5	3.29335e-05
		1825.25	3.27772e-05
		1827	3.26216e-05
		1828.75	3.24667e-05
		1830.5	3.23124e-05
		1832.25	3.21589e-05
		1834	3.20061e-05
		1835.75	3.18541e-05
		1837.5	3.17028e-05
		1839.25	3.15523e-05
		1841	3.14026e-05
		1842.75	3.12537e-05
		1844.5	3.11056e-05
		1846.25	3.09582e-05
		1848	3.08117e-05
		1849.75	3.06659e-05
		1851.5	3.05222e-05
		1853.25	3.03794e-05
		1855	3.02389e-05
		1856.75	3.01021e-05
		1858.5	2.99714e-05
		1860.25	2.9851e-05
		1862	2.97477e-05
		1863.75	2.96721e-05
		1865.5	2.96401e-05
		1867.25	2.96744e-05
		1869	2.98057e-05
		1870.75	3.00735e-05
		1872.5	3.05251e-05
		1874.25	3.12133e-05
		1876	3.21911e-05
		1877.75	3.35042e-05
		1879.5	3.51808e-05
		1881.25	3.72214e-05
		1883	3.95874e-05
		1884.75	4.21979e-05
		1886.5	4.49238e-05
		1888.25	4.75977e-05
		1890	5.00272e-05
		1891.75	5.20157e-05
		1893.5	5.33863e-05
		1895.25	5.40087e-05
		1897	5.3814e-05
		1898.75	5.28074e-05
		1900.5	5.10671e-05
		1902.25	4.87324e-05
		1904	4.59838e-05
		1905.75	4.30186e-05
		1907.5	4.00269e-05
		1909.25	3.71712e-05
		1911	3.45731e-05
		1912.75	3.23085e-05
		1914.5	3.04092e-05
		1916.25	2.88695e-05
		1918	2.76591e-05
		1919.75	2.67301e-05
		1921.5	2.6029e-05
		1923.25	2.55036e-05
		1925	2.51074e-05
		1926.75	2.48022e-05
		1928.5	2.45586e-05
		1930.25	2.43547e-05
		1932	2.41756e-05
		1933.75	2.4012e-05
		1935.5	2.38561e-05
		1937.25	2.3704e-05
		1939	2.35549e-05
		1940.75	2.34068e-05
		1942.5	2.32585e-05
		1944.25	2.3111e-05
		1946	2.29632e-05
		1947.75	2.28151e-05
		1949.5	2.26667e-05
		1951.25	2.25182e-05
		1953	2.23695e-05
		1954.75	2.22208e-05
		1956.5	2.2072e-05
		1958.25	2.19232e-05
		1960	2.17738e-05
		1961.75	2.16246e-05
		1963.5	2.14763e-05
		1965.25	2.13282e-05
		1967	2.11804e-05
		1968.75	2.10329e-05
		1970.5	2.08852e-05
		1972.25	2.0738e-05
		1974	2.05921e-05
		1975.75	2.04467e-05
		1977.5	2.0302e-05
		1979.25	2.0158e-05
		1981	2.00148e-05
		1982.75	1.98724e-05
		1984.5	1.97308e-05
		1986.25	1.95909e-05
		1988	1.94513e-05
		1989.75	1.93127e-05
		1991.5	1.91752e-05
		1993.25	1.90388e-05
		1995	1.8903e-05
		1996.75	1.8769e-05
		1998.5	1.86363e-05
		2000.25	1.85048e-05
		2002	1.83747e-05
		2003.75	1.82458e-05
		2005.5	1.81183e-05
		2007.25	1.79922e-05
		2009	1.78674e-05
		2010.75	1.7744e-05
		2012.5	1.76221e-05
		2014.25	1.75015e-05
		2016	1.73823e-05
		2017.75	1.72645e-05
		2019.5	1.71489e-05
		2021.25	1.70339e-05
		2023	1.69204e-05
		2024.75	1.68082e-05
		2026.5	1.66974e-05
		2028.25	1.65872e-05
		2030	1.64791e-05
		2031.75	1.63722e-05
		2033.5	1.62666e-05
		2035.25	1.61622e-05
		2037	1.60589e-05
		2038.75	1.59562e-05
		2040.5	1.58553e-05
		2042.25	1.57555e-05
		2044	1.56574e-05
		2045.75	1.55597e-05
		2047.5	1.54629e-05
		2049.25	1.53678e-05
		2051	1.52728e-05
		2052.75	1.51793e-05
		2054.5	1.50861e-05
		2056.25	1.49935e-05
		2058	1.49017e-05
		2059.75	1.48105e-05
		2061.5	1.47199e-05
		2063.25	1.46299e-05
		2065	1.45405e-05
		2066.75	1.44516e-05
		2068.5	1.43631e-05
		2070.25	1.4275e-05
		2072	1.41874e-05
		2073.75	1.41001e-05
		2075.5	1.40131e-05
		2077.25	1.39265e-05
		2079	1.38402e-05
		2080.75	1.37541e-05
		2082.5	1.3669e-05
		2084.25	1.35834e-05
		2086	1.34981e-05
		2087.75	1.34131e-05
		2089.5	1.33276e-05
		2091.25	1.3243e-05
		2093	1.31594e-05
		2094.75	1.30753e-05
		2096.5	1.29915e-05
		2098.25	1.29079e-05
		2100	1.28246e-05
		2101.75	1.27416e-05
		2103.5	1.2659e-05
		2105.25	1.25767e-05
		2107	1.24948e-05
		2108.75	1.2414e-05
		2110.5	1.2333e-05
		2112.25	1.22526e-05
		2114	1.21727e-05
		2115.75	1.20934e-05
		2117.5	1.20136e-05
		2119.25	1.19358e-05
		2121	1.18589e-05
		2122.75	1.17828e-05
		2124.5	1.17076e-05
		2126.25	1.16334e-05
		2128	1.15602e-05
		2129.75	1.14882e-05
		2131.5	1.14174e-05
		2133.25	1.1348e-05
		2135	1.12798e-05
		2136.75	1.12132e-05
		2138.5	1.11481e-05
		2140.25	1.10846e-05
		2142	1.10229e-05
		2143.75	1.09623e-05
		2145.5	1.09043e-05
		2147.25	1.08483e-05
		2149	1.07943e-05
		2150.75	1.07426e-05
		2152.5	1.0693e-05
		2154.25	1.06459e-05
		2156	1.06011e-05
		2157.75	1.05589e-05
		2159.5	1.05186e-05
		2161.25	1.04817e-05
		2163	1.04476e-05
		2164.75	1.04163e-05
		2166.5	1.03887e-05
		2168.25	1.03634e-05
		2170	1.03413e-05
		2171.75	1.03222e-05
		2173.5	1.03065e-05
		2175.25	1.0294e-05
		2177	1.02849e-05
		2178.75	1.02793e-05
		2180.5	1.02771e-05
		2182.25	1.02785e-05
		2184	1.02835e-05
		2185.75	1.02922e-05
		2187.5	1.03045e-05
		2189.25	1.03206e-05
		2191	1.03405e-05
		2192.75	1.03641e-05
		2194.5	1.03915e-05
		2196.25	1.04228e-05
		2198	1.0458e-05
		2199.75	1.0497e-05
		2201.5	1.05399e-05
		2203.25	1.05867e-05
		2205	1.06374e-05
		2206.75	1.06919e-05
		2208.5	1.07502e-05
		2210.25	1.08124e-05
		2212	1.08777e-05
		2213.75	1.09474e-05
		2215.5	1.10216e-05
		2217.25	1.10982e-05
		2219	1.11791e-05
		2220.75	1.12629e-05
		2222.5	1.1351e-05
		2224.25	1.14424e-05
		2226	1.15373e-05
		2227.75	1.16354e-05
		2229.5	1.17368e-05
		2231.25	1.18413e-05
		2233	1.19495e-05
		2234.75	1.20601e-05
		2236.5	1.21741e-05
		2238.25	1.22903e-05
		2240	1.24091e-05
		2241.75	1.25304e-05
		2243.5	1.26541e-05
		2245.25	1.27794e-05
		2247	1.29076e-05
		2248.75	1.30377e-05
		2250.5	1.31697e-05
		2252.25	1.33034e-05
		2254	1.34387e-05
		2255.75	1.35754e-05
		2257.5	1.37134e-05
		2259.25	1.38525e-05
		2261	1.39919e-05
		2262.75	1.41328e-05
		2264.5	1.4275e-05
		2266.25	1.44164e-05
		2268	1.45589e-05
		2269.75	1.47014e-05
		2271.5	1.4844e-05
		2273.25	1.49864e-05
		2275	1.51284e-05
		2276.75	1.52699e-05
		2278.5	1.54108e-05
		2280.25	1.55508e-05
		2282	1.56897e-05
		2283.75	1.58275e-05
		2285.5	1.5964e-05
		2287.25	1.6099e-05
		2289	1.62323e-05
		2290.75	1.63632e-05
		2292.5	1.64928e-05
		2294.25	1.66202e-05
		2296	1.67455e-05
		2297.75	1.68683e-05
		2299.5	1.69886e-05
		2301.25	1.71062e-05
		2303	1.72211e-05
		2304.75	1.7333e-05
		2306.5	1.74419e-05
		2308.25	1.75476e-05
		2310	1.76501e-05
		2311.75	1.77493e-05
		2313.5	1.7845e-05
		2315.25	1.79378e-05
		2317	1.80264e-05
		2318.75	1.81114e-05
		2320.5	1.81932e-05
		2322.25	1.82707e-05
		2324	1.83443e-05
		2325.75	1.8414e-05
		2327.5	1.84792e-05
		2329.25	1.85411e-05
		2331	1.85991e-05
		2332.75	1.8653e-05
		2334.5	1.8703e-05
		2336.25	1.8749e-05
		2338	1.8791e-05
		2339.75	1.88285e-05
		2341.5	1.88628e-05
		2343.25	1.88931e-05
		2345	1.89197e-05
		2346.75	1.89425e-05
		2348.5	1.89616e-05
		2350.25	1.89771e-05
		2352	1.89897e-05
		2353.75	1.89983e-05
		2355.5	1.90035e-05
		2357.25	1.90054e-05
		2359	1.90042e-05
		2360.75	1.9e-05
		2362.5	1.89929e-05
		2364.25	1.8983e-05
		2366	1.89704e-05
		2367.75	1.89554e-05
		2369.5	1.8938e-05
		2371.25	1.89184e-05
		2373	1.88968e-05
		2374.75	1.88733e-05
		2376.5	1.88481e-05
		2378.25	1.88214e-05
		2380	1.87933e-05
		2381.75	1.87639e-05
		2383.5	1.87336e-05
		2385.25	1.87018e-05
		2387	1.86701e-05
		2388.75	1.86379e-05
		2390.5	1.86054e-05
		2392.25	1.85728e-05
		2394	1.85403e-05
		2395.75	1.85082e-05
		2397.5	1.84758e-05
		2399.25	1.84448e-05
		2401	1.84147e-05
		2402.75	1.83856e-05
		2404.5	1.8357e-05
		2406.25	1.83306e-05
		2408	1.83057e-05
		2409.75	1.82825e-05
		2411.5	1.82613e-05
		2413.25	1.82421e-05
		2415	1.82252e-05
		2416.75	1.82107e-05
		2418.5	1.81988e-05
		2420.25	1.81903e-05
		2422	1.8184e-05
		2423.75	1.81807e-05
		2425.5	1.81806e-05
		2427.25	1.81837e-05
		2429	1.81902e-05
		2430.75	1.82002e-05
		2432.5	1.82138e-05
		2434.25	1.82311e-05
		2436	1.82523e-05
		2437.75	1.82773e-05
		2439.5	1.83062e-05
		2441.25	1.83392e-05
		2443	1.83764e-05
		2444.75	1.84176e-05
		2446.5	1.84631e-05
		2448.25	1.85128e-05
		2450	1.85668e-05
		2451.75	1.86251e-05
		2453.5	1.86878e-05
		2455.25	1.87547e-05
		2457	1.8826e-05
		2458.75	1.89016e-05
		2460.5	1.89815e-05
		2462.25	1.90657e-05
		2464	1.91541e-05
		2465.75	1.92468e-05
		2467.5	1.93436e-05
		2469.25	1.94445e-05
		2471	1.95495e-05
		2472.75	1.96585e-05
		2474.5	1.97714e-05
		2476.25	1.9888e-05
		2478	2.00085e-05
		2479.75	2.01325e-05
		2481.5	2.02602e-05
		2483.25	2.03912e-05
		2485	2.05255e-05
		2486.75	2.06631e-05
		2488.5	2.08037e-05
		2490.25	2.09473e-05
		2492	2.10936e-05
		2493.75	2.12426e-05
		2495.5	2.13942e-05
		2497.25	2.15481e-05
		2499	2.17042e-05
		2500.75	2.18624e-05
		2502.5	2.20224e-05
		2504.25	2.21842e-05
		2506	2.23476e-05
		2507.75	2.25123e-05
		2509.5	2.26783e-05
		2511.25	2.28453e-05
		2513	2.30132e-05
		2514.75	2.31818e-05
		2516.5	2.33509e-05
		2518.25	2.35203e-05
		2520	2.36892e-05
		2521.75	2.38588e-05
		2523.5	2.40281e-05
		2525.25	2.4197e-05
		2527	2.43654e-05
		2528.75	2.4533e-05
		2530.5	2.46996e-05
		2532.25	2.48651e-05
		2534	2.50293e-05
		2535.75	2.5192e-05
		2537.5	2.53538e-05
		2539.25	2.5513e-05
		2541	2.56703e-05
		2542.75	2.58254e-05
		2544.5	2.59782e-05
		2546.25	2.61284e-05
		2548	2.6276e-05
		2549.75	2.64207e-05
		2551.5	2.65625e-05
		2553.25	2.67011e-05
		2555	2.68365e-05
		2556.75	2.69684e-05
		2558.5	2.70967e-05
		2560.25	2.72214e-05
		2562	2.73422e-05
		2563.75	2.7459e-05
		2565.5	2.75717e-05
		2567.25	2.76803e-05
		2569	2.77845e-05
		2570.75	2.78843e-05
		2572.5	2.79796e-05
		2574.25	2.80695e-05
		2576	2.81555e-05
		2577.75	2.82366e-05
		2579.5	2.83128e-05
		2581.25	2.83841e-05
		2583	2.84503e-05
		2584.75	2.85114e-05
		2586.5	2.85673e-05
		2588.25	2.8618e-05
		2590	2.86635e-05
		2591.75	2.87037e-05
		2593.5	2.87386e-05
		2595.25	2.8768e-05
		2597	2.87921e-05
		2598.75	2.88107e-05
		2600.5	2.88239e-05
		2602.25	2.88317e-05
		2604	2.88339e-05
		2605.75	2.88307e-05
		2607.5	2.88221e-05
		2609.25	2.8808e-05
		2611	2.87885e-05
		2612.75	2.87637e-05
		2614.5	2.87334e-05
		2616.25	2.86979e-05
		2618	2.86571e-05
		2619.75	2.8611e-05
		2621.5	2.85598e-05
		2623.25	2.85034e-05
		2625	2.8442e-05
		2626.75	2.83755e-05
		2628.5	2.83042e-05
		2630.25	2.8228e-05
		2632	2.8147e-05
		2633.75	2.80614e-05
		2635.5	2.79711e-05
		2637.25	2.78763e-05
		2639	2.77772e-05
		2640.75	2.76737e-05
		2642.5	2.7566e-05
		2644.25	2.74542e-05
		2646	2.73385e-05
		2647.75	2.72175e-05
		2649.5	2.70936e-05
		2651.25	2.69667e-05
		2653	2.68363e-05
		2654.75	2.67025e-05
		2656.5	2.65654e-05
		2658.25	2.64252e-05
		2660	2.6282e-05
		2661.75	2.61359e-05
		2663.5	2.59871e-05
		2665.25	2.58357e-05
		2667	2.56818e-05
		2668.75	2.55256e-05
		2670.5	2.53672e-05
		2672.25	2.52068e-05
		2674	2.50444e-05
		2675.75	2.48804e-05
		2677.5	2.47147e-05
		2679.25	2.45475e-05
		2681	2.43791e-05
		2682.75	2.42094e-05
		2684.5	2.40387e-05
		2686.25	2.38671e-05
		2688	2.36947e-05
		2689.75	2.35217e-05
		2691.5	2.33483e-05
		2693.25	2.31745e-05
		2695	2.30005e-05
		2696.75	2.28264e-05
		2698.5	2.26524e-05
		2700.25	2.24786e-05
		2702	2.2305e-05
		2703.75	2.2132e-05
		2705.5	2.19595e-05
		2707.25	2.17877e-05
		2709	2.16167e-05
		2710.75	2.14466e-05
		2712.5	2.12776e-05
		2714.25	2.11097e-05
		2716	2.0943e-05
		2717.75	2.07777e-05
		2719.5	2.06139e-05
		2721.25	2.04515e-05
		2723	2.02909e-05
		2724.75	2.01319e-05
		2726.5	1.99747e-05
		2728.25	1.98194e-05
		2730	1.96661e-05
		2731.75	1.95148e-05
		2733.5	1.93655e-05
		2735.25	1.92184e-05
		2737	1.90735e-05
		2738.75	1.89308e-05
		2740.5	1.87904e-05
		2742.25	1.86524e-05
		2744	1.85166e-05
		2745.75	1.83833e-05
		2747.5	1.82524e-05
		2749.25	1.81239e-05
		2751	1.79978e-05
		2752.75	1.78741e-05
		2754.5	1.77529e-05
		2756.25	1.76341e-05
		2758	1.75178e-05
		2759.75	1.74032e-05
		2761.5	1.72917e-05
		2763.25	1.71825e-05
		2765	1.70757e-05
		2766.75	1.69712e-05
		2768.5	1.68689e-05
		2770.25	1.67688e-05
		2772	1.66708e-05
		2773.75	1.6575e-05
		2775.5	1.64806e-05
		2777.25	1.63888e-05
		2779	1.62989e-05
		2780.75	1.62109e-05
		2782.5	1.61246e-05
		2784.25	1.604e-05
		2786	1.59569e-05
		2787.75	1.58754e-05
		2789.5	1.57953e-05
		2791.25	1.57165e-05
		2793	1.56389e-05
		2794.75	1.55625e-05
		2796.5	1.54871e-05
		2798.25	1.54126e-05
		2800	1.53389e-05
		2801.75	1.5266e-05
		2803.5	1.51937e-05
		2805.25	1.51219e-05
		2807	1.50505e-05
		2808.75	1.49794e-05
		2810.5	1.49085e-05
		2812.25	1.48377e-05
		2814	1.47669e-05
		2815.75	1.4696e-05
		2817.5	1.46248e-05
		2819.25	1.45533e-05
		2821	1.44814e-05
		2822.75	1.44084e-05
		2824.5	1.43353e-05
		2826.25	1.42616e-05
		2828	1.41871e-05
		2829.75	1.41117e-05
		2831.5	1.40346e-05
		2833.25	1.39573e-05
		2835	1.38787e-05
		2836.75	1.3799e-05
		2838.5	1.37179e-05
		2840.25	1.36355e-05
		2842	1.35517e-05
		2843.75	1.34664e-05
		2845.5	1.33796e-05
		2847.25	1.32911e-05
		2849	1.32011e-05
		2850.75	1.31094e-05
		2852.5	1.30159e-05
		2854.25	1.29208e-05
		2856	1.28238e-05
		2857.75	1.27251e-05
		2859.5	1.26245e-05
		2861.25	1.25222e-05
		2863	1.24179e-05
		2864.75	1.23119e-05
		2866.5	1.2204e-05
		2868.25	1.20943e-05
		2870	1.1982e-05
		2871.75	1.18687e-05
		2873.5	1.17536e-05
		2875.25	1.16367e-05
		2877	1.15181e-05
		2878.75	1.13977e-05
		2880.5	1.12756e-05
		2882.25	1.11519e-05
		2884	1.10266e-05
		2885.75	1.08998e-05
		2887.5	1.07714e-05
		2889.25	1.06415e-05
		2891	1.05103e-05
		2892.75	1.03777e-05
		2894.5	1.02438e-05
		2896.25	1.01087e-05
		2898	9.97249e-06
		2899.75	9.83517e-06
		2901.5	9.69682e-06
		2903.25	9.55754e-06
		2905	9.41677e-06
		2906.75	9.27589e-06
		2908.5	9.1343e-06
		2910.25	8.99207e-06
		2912	8.84929e-06
		2913.75	8.70603e-06
		2915.5	8.56237e-06
		2917.25	8.41841e-06
		2919	8.27422e-06
		2920.75	8.12988e-06
		2922.5	7.98548e-06
		2924.25	7.8411e-06
		2926	7.69683e-06
		2927.75	7.55275e-06
		2929.5	7.40893e-06
		2931.25	7.26547e-06
		2933	7.12177e-06
		2934.75	6.9793e-06
		2936.5	6.83742e-06
		2938.25	6.6962e-06
		2940	6.55571e-06
		2941.75	6.41603e-06
		2943.5	6.27722e-06
		2945.25	6.13937e-06
		2947	6.0019e-06
		2948.75	5.86619e-06
		2950.5	5.73164e-06
		2952.25	5.59829e-06
		2954	5.46622e-06
		2955.75	5.33548e-06
		2957.5	5.20612e-06
		2959.25	5.07821e-06
		2961	4.95178e-06
		2962.75	4.8269e-06
		2964.5	4.7036e-06
		2966.25	4.58193e-06
		2968	4.46194e-06
		2969.75	4.34365e-06
		2971.5	4.22711e-06
		2973.25	4.11235e-06
		2975	3.9994e-06
		2976.75	3.88828e-06
		2978.5	3.77903e-06
		2980.25	3.67167e-06
		2982	3.56621e-06
		2983.75	3.46205e-06
		2985.5	3.3605e-06
		2987.25	3.26091e-06
		2989	3.16327e-06
		2990.75	3.06761e-06
		2992.5	2.97392e-06
		2994.25	2.88221e-06
		2996	2.79248e-06
		2997.75	2.70472e-06
		2999.5	2.61895e-06
		3001.25	2.5345e-06
		3003	2.45273e-06
		3004.75	2.3729e-06
		3006.5	2.29502e-06
		3008.25	2.21907e-06
		3010	2.14575e-06
		3011.75	2.07369e-06
		3013.5	2.00352e-06
		3015.25	1.93522e-06
		3017	1.86878e-06
		3018.75	1.80417e-06
		3020.5	1.74138e-06
		3022.25	1.68037e-06
		3024	1.62113e-06
		3025.75	1.56364e-06
		3027.5	1.50786e-06
		3029.25	1.45311e-06
		3031	1.40073e-06
		3032.75	1.34998e-06
		3034.5	1.30084e-06
		3036.25	1.25327e-06
		3038	1.20726e-06
		3039.75	1.16276e-06
		3041.5	1.11976e-06
		3043.25	1.07823e-06
		3045	1.03812e-06
		3046.75	9.99428e-07
		3048.5	9.62109e-07
		3050.25	9.26138e-07
		3052	8.91487e-07
		3053.75	8.58128e-07
		3055.5	8.26032e-07
		3057.25	7.95174e-07
		3059	7.65525e-07
		3060.75	7.3639e-07
		3062.5	7.09125e-07
		3064.25	6.82992e-07
		3066	6.57966e-07
		3067.75	6.34023e-07
		3069.5	6.11142e-07
		3071.25	5.893e-07
		3073	5.68478e-07
		3074.75	5.48656e-07
		3076.5	5.29814e-07
		3078.25	5.11935e-07
		3080	4.95002e-07
		3081.75	4.79001e-07
		3083.5	4.63915e-07
		3085.25	4.49733e-07
		3087	4.36442e-07
		3088.75	4.2403e-07
		3090.5	4.12488e-07
		3092.25	4.01807e-07
		3094	3.9198e-07
		3095.75	3.83001e-07
		3097.5	3.74864e-07
		3099.25	3.67566e-07
		3101	3.61104e-07
		3102.75	3.55477e-07
		3104.5	3.50685e-07
		3106.25	3.46728e-07
		3108	3.4361e-07
		3109.75	3.41333e-07
		3111.5	3.39901e-07
		3113.25	3.39321e-07
		3115	3.396e-07
		3116.75	3.40125e-07
		3118.5	3.42207e-07
		3120.25	3.45167e-07
		3122	3.49017e-07
		3123.75	3.53769e-07
		3125.5	3.59436e-07
		3127.25	3.66031e-07
		3129	3.73569e-07
		3130.75	3.82065e-07
		3132.5	3.91534e-07
		3134.25	4.01993e-07
		3136	4.13456e-07
		3137.75	4.25942e-07
		3139.5	4.39466e-07
		3141.25	4.54046e-07
		3143	4.697e-07
		3144.75	4.86443e-07
		3146.5	5.04294e-07
		3148.25	5.23268e-07
		3150	5.43382e-07
		3151.75	5.64652e-07
		3153.5	5.87094e-07
		3155.25	6.10721e-07
		3157	6.35547e-07
		3158.75	6.61587e-07
		3160.5	6.8885e-07
		3162.25	7.17349e-07
		3164	7.47092e-07
		3165.75	7.78088e-07
		3167.5	8.10343e-07
		3169.25	8.43862e-07
		3171	8.78648e-07
		3172.75	9.14702e-07
		3174.5	9.52023e-07
		3176.25	9.90609e-07
		3178	1.03045e-06
		3179.75	1.07155e-06
		3181.5	1.11389e-06
		3183.25	1.15745e-06
		3185	1.20223e-06
		3186.75	1.24821e-06
		3188.5	1.29536e-06
		3190.25	1.34366e-06
		3192	1.39309e-06
		3193.75	1.44361e-06
		3195.5	1.49452e-06
		3197.25	1.5472e-06
		3199	1.60085e-06
		3200.75	1.65544e-06
		3202.5	1.71093e-06
		3204.25	1.76726e-06
		3206	1.82439e-06
		3207.75	1.88226e-06
		3209.5	1.94081e-06
		3211.25	1.99998e-06
		3213	2.05971e-06
		3214.75	2.11993e-06
		3216.5	2.18057e-06
		3218.25	2.24155e-06
		3220	2.30281e-06
		3221.75	2.36426e-06
		3223.5	2.42583e-06
		3225.25	2.48743e-06
		3227	2.54898e-06
		3228.75	2.61038e-06
		3230.5	2.67156e-06
		3232.25	2.73242e-06
		3234	2.79287e-06
		3235.75	2.85281e-06
		3237.5	2.91217e-06
		3239.25	2.97083e-06
		3241	3.0287e-06
		3242.75	3.0857e-06
		3244.5	3.14172e-06
		3246.25	3.196e-06
		3248	3.24982e-06
		3249.75	3.30239e-06
		3251.5	3.3536e-06
		3253.25	3.40338e-06
		3255	3.45162e-06
		3256.75	3.49823e-06
		3258.5	3.54315e-06
		3260.25	3.58627e-06
		3262	3.62753e-06
		3263.75	3.66684e-06
		3265.5	3.70412e-06
		3267.25	3.73932e-06
		3269	3.77168e-06
		3270.75	3.80252e-06
		3272.5	3.83107e-06
		3274.25	3.85728e-06
		3276	3.8811e-06
		3277.75	3.90247e-06
		3279.5	3.92136e-06
		3281.25	3.93772e-06
		3283	3.95153e-06
		3284.75	3.96276e-06
		3286.5	3.97138e-06
		3288.25	3.97737e-06
		3290	3.98073e-06
		3291.75	3.98145e-06
		3293.5	3.97952e-06
		3295.25	3.97494e-06
		3297	3.96774e-06
		3298.75	3.95792e-06
		3300.5	3.94549e-06
		3302.25	3.93049e-06
		3304	3.91295e-06
		3305.75	3.89289e-06
		3307.5	3.87036e-06
		3309.25	3.8454e-06
		3311	3.81806e-06
		3312.75	3.7884e-06
		3314.5	3.75646e-06
		3316.25	3.72232e-06
		3318	3.68603e-06
		3319.75	3.64767e-06
		3321.5	3.60731e-06
		3323.25	3.56502e-06
		3325	3.52088e-06
		3326.75	3.47432e-06
		3328.5	3.42676e-06
		3330.25	3.37694e-06
		3332	3.32629e-06
		3333.75	3.27422e-06
		3335.5	3.22082e-06
		3337.25	3.16618e-06
		3339	3.1104e-06
		3340.75	3.05356e-06
		3342.5	2.99577e-06
		3344.25	2.93711e-06
		3346	2.87768e-06
		3347.75	2.81758e-06
		3349.5	2.75689e-06
		3351.25	2.69572e-06
		3353	2.63415e-06
		3354.75	2.57227e-06
		3356.5	2.51017e-06
		3358.25	2.44794e-06
		3360	2.38566e-06
		3361.75	2.32341e-06
		3363.5	2.26129e-06
		3365.25	2.19936e-06
		3367	2.1377e-06
		3368.75	2.07639e-06
		3370.5	2.01549e-06
		3372.25	1.95507e-06
		3374	1.8952e-06
		3375.75	1.83595e-06
		3377.5	1.77736e-06
		3379.25	1.71949e-06
		3381	1.6624e-06
		3382.75	1.60614e-06
		3384.5	1.55074e-06
		3386.25	1.49626e-06
		3388	1.44274e-06
		3389.75	1.3902e-06
		3391.5	1.33868e-06
		3393.25	1.28821e-06
		3395	1.23882e-06
		3396.75	1.19053e-06
		3398.5	1.14336e-06
		3400.25	1.09733e-06
		3402	1.05245e-06
		3403.75	1.00873e-06
		3405.5	9.66187e-07
		3407.25	9.2482e-07
		3409	8.84635e-07
		3410.75	8.45632e-07
		3412.5	8.07811e-07
		3414.25	7.71167e-07
		3416	7.35695e-07
		3417.75	7.01387e-07
		3419.5	6.68234e-07
		3421.25	6.36224e-07
		3423	6.05344e-07
		3424.75	5.75579e-07
		3426.5	5.46913e-07
		3428.25	5.19329e-07
		3430	4.92808e-07
		3431.75	4.67329e-07
		3433.5	4.42873e-07
		3435.25	4.19417e-07
		3437	3.96939e-07
		3438.75	3.75415e-07
		3440.5	3.54822e-07
		3442.25	3.35135e-07
		3444	3.1633e-07
		3445.75	2.98381e-07
		3447.5	2.81263e-07
		3449.25	2.6495e-07
		3451	2.49418e-07
		3452.75	2.34639e-07
		3454.5	2.2059e-07
		3456.25	2.07243e-07
		3458	1.94574e-07
		3459.75	1.82558e-07
		3461.5	1.7117e-07
		3463.25	1.60386e-07
		3465	1.50181e-07
		3466.75	1.40531e-07
		3468.5	1.31414e-07
		3470.25	1.22807e-07
		3472	1.14687e-07
		3473.75	1.07032e-07
		3475.5	9.98223e-08
		3477.25	9.30359e-08
		3479	8.66531e-08
		3480.75	8.06545e-08
		3482.5	7.50211e-08
		3484.25	6.97347e-08
		3486	6.47776e-08
		3487.75	6.01329e-08
		3489.5	5.5784e-08
		3491.25	5.17152e-08
		3493	4.79112e-08
		3494.75	4.43574e-08
		3496.5	4.10399e-08
		3498.25	3.79453e-08
[truncated: 1 more rows]

## Sheet: PlotDat8
Source sheet	ZirconData	0	0	87.5	0	0	0
Plot name	ProbDens4	1.75	0	175	0	3498.25	0
Plot Type	16	3.5	0	175	772
1st free col	9	5.25	0	87.5	772
Sigma Level	2	7	0	87.5	0
Absolute Errs	TRUE	8.75	0	ErrBox	ErrBox
Symbol Type	1	10.5	0	175	0
Inverse Plot	FALSE	12.25	0	262.5	0
Color Plot	TRUE	14	0	262.5	552
3D plot	FALSE	15.75	0	175	552
Linear	FALSE	17.5	0	175	0
Data Range	AA2:AB1397	19.25	0	ErrBox	ErrBox
Filled Symbols	FALSE	21	0	262.5	0
ConcAge	FALSE	22.75	0	350	0
ConcSwap	TRUE	24.5	0	350	16
1st Symbol-row	1	26.25	0	262.5	16
		28	0	262.5	0
		29.75	0	ErrBox	ErrBox
		31.5	0	350	0
		33.25	0	437.5	0
		35	0	437.5	2
		36.75	0	350	2
		38.5	0	350	0
		40.25	0	ErrBox	ErrBox
		42	0	437.5	0
		43.75	0	525	0
		45.5	0	525	7
		47.25	0	437.5	7
		49	0	437.5	0
		50.75	0	ErrBox	ErrBox
		52.5	0	525	0
		54.25	0	612.5	0
		56	0	612.5	1
		57.75	0	525	1
		59.5	0	525	0
		61.25	0	ErrBox	ErrBox
		63	0	700	0
		64.75	0	787.5	0
		66.5	0	787.5	3
		68.25	0	700	3
		70	0	700	0
		71.75	0	ErrBox	ErrBox
		73.5	0	787.5	0
		75.25	0	875	0
		77	0	875	3
		78.75	0	787.5	3
		80.5	0	787.5	0
		82.25	0	ErrBox	ErrBox
		84	2.53462e-08	875	0
		85.75	1.17764e-06	962.5	0
		87.5	1.83934e-05	962.5	2
		89.25	9.6627e-05	875	2
		91	0.000172601	875	0
		92.75	0.000134673	ErrBox	ErrBox
		94.5	0.000309366	962.5	0
		96.25	0.00176124	1050	0
		98	0.00700078	1050	2
		99.75	0.0168045	962.5	2
		101.5	0.0276114	962.5	0
		103.25	0.0264609	ErrBox	ErrBox
		105	0.0155094	1312.5	0
		106.75	0.00758218	1400	0
		108.5	0.00450611	1400	1
		110.25	0.00333228	1312.5	1
		112	0.00177012	1312.5	0
		113.75	0.000982422	ErrBox	ErrBox
		115.5	0.000870211	1487.5	0
		117.25	0.00097899	1575	0
		119	0.00123735	1575	1
		120.75	0.00240462	1487.5	1
		122.5	0.00359593	1487.5	0
		124.25	0.00337356	ErrBox	ErrBox
		126	0.00249122	1575	0
		127.75	0.00191699	1662.5	0
		129.5	0.00148858	1662.5	4
		131.25	0.00103748	1575	4
		133	0.000654239	1575	0
		134.75	0.000520054	ErrBox	ErrBox
		136.5	0.000842341	1662.5	0
		138.25	0.00111165	1750	0
		140	0.00100847	1750	3
		141.75	0.000934777	1662.5	3
		143.5	0.00130791	1662.5	0
		145.25	0.00311142	ErrBox	ErrBox
		147	0.00727306	1750	0
		148.75	0.0124601	1837.5	0
		150.5	0.0141021	1837.5	3
		152.25	0.0125521	1750	3
		154	0.0101729	1750	0
		155.75	0.00787973	ErrBox	ErrBox
		157.5	0.00708148	1837.5	0
		159.25	0.00831587	1925	0
		161	0.0106108	1925	2
		162.75	0.0130244	1837.5	2
		164.5	0.0145946	1837.5	0
		166.25	0.014917	ErrBox	ErrBox
		168	0.0129106	2012.5	0
		169.75	0.0102884	2100	0
		171.5	0.00810789	2100	3
		173.25	0.00613531	2012.5	3
		175	0.00473078	2012.5	0
		176.75	0.00411648	ErrBox	ErrBox
		178.5	0.00353876	2100	0
		180.25	0.00294075	2187.5	0
		182	0.00243516	2187.5	1
		183.75	0.0020739	2100	1
		185.5	0.00178156	2100	0
		187.25	0.00147118	ErrBox	ErrBox
		189	0.00128234	2275	0
		190.75	0.00125826	2362.5	0
		192.5	0.00127777	2362.5	5
		194.25	0.00135233	2275	5
		196	0.00176981	2275	0
		197.75	0.0027467	ErrBox	ErrBox
		199.5	0.00412105	2362.5	0
		201.25	0.00555714	2450	0
		203	0.00709814	2450	1
		204.75	0.00900568	2362.5	1
		206.5	0.0116866	2362.5	0
		208.25	0.0144061	ErrBox	ErrBox
		210	0.0156174	2450	0
		211.75	0.0153653	2537.5	0
		213.5	0.0148843	2537.5	2
		215.25	0.0146922	2450	2
		217	0.0140287	2450	0
		218.75	0.0120194	ErrBox	ErrBox
		220.5	0.00877645	2537.5	0
		222.25	0.00553806	2625	0
		224	0.0035326	2625	2
		225.75	0.00285471	2537.5	2
		227.5	0.00293688	2537.5	0
		229.25	0.00314299	ErrBox	ErrBox
		231	0.00308468	2625	0
		232.75	0.00278751	2712.5	0
		234.5	0.00240109	2712.5	4
		236.25	0.00198096	2625	4
		238	0.00157409	2625	0
		239.75	0.00126055	ErrBox	ErrBox
		241.5	0.00108395	2712.5	0
		243.25	0.00104515	2800	0
		245	0.00110793	2800	2
		246.75	0.00123128	2712.5	2
		248.5	0.0014043	2712.5	0
		250.25	0.00160327	ErrBox	ErrBox
		252	0.00175912	2887.5	0
		253.75	0.00181052	2975	0
		255.5	0.00174048	2975	1
		257.25	0.00155186	2887.5	1
		259	0.00126613	2887.5	0
		260.75	0.00094121	ErrBox	ErrBox
		262.5	0.000650917	3237.5	0
		264.25	0.000444175	3325	0
		266	0.000328915	3325	1
		267.75	0.000283537	3237.5	1
		269.5	0.000275241	3237.5	0
		271.25	0.000275174	ErrBox	ErrBox
		273	0.000268229
		274.75	0.000253154
		276.5	0.000233757
		278.25	0.00021092
		280	0.000182736
		281.75	0.000149288
		283.5	0.000114883
		285.25	8.56304e-05
		287	6.57578e-05
		288.75	5.59158e-05
		290.5	5.39292e-05
		292.25	5.65658e-05
		294	6.09276e-05
		295.75	6.50365e-05
		297.5	6.78613e-05
		299.25	6.91188e-05
		301	6.90897e-05
		302.75	6.84882e-05
		304.5	6.83009e-05
		306.25	6.95431e-05
		308	7.29e-05
		309.75	7.84053e-05
		311.5	8.53574e-05
		313.25	9.25941e-05
		315	9.90356e-05
		316.75	0.000104182
		318.5	0.000108264
		320.25	0.000111961
		322	0.000115892
		323.75	0.000120207
		325.5	0.000124487
		327.25	0.00012797
		329	0.000129944
		330.75	0.000130231
		332.5	0.000129716
		334.25	0.000130631
		336	0.000135746
		337.75	0.00014573
		339.5	0.000156232
		341.25	0.000158707
		343	0.000146512
		344.75	0.000120942
		346.5	9.03896e-05
		348.25	6.35996e-05
		350	4.44392e-05
		351.75	3.2121e-05
		353.5	2.4284e-05
		355.25	1.91885e-05
		357	1.61415e-05
		358.75	1.50968e-05
		360.5	1.62132e-05
		362.25	1.9551e-05
		364	2.48437e-05
		365.75	3.1368e-05
		367.5	3.79563e-05
		369.25	4.32104e-05
		371	4.58741e-05
		372.75	4.52317e-05
		374.5	4.13368e-05
		376.25	3.49817e-05
		378	2.73991e-05
		379.75	1.98589e-05
		381.5	1.33189e-05
		383.25	8.26866e-06
		385	4.75783e-06
		386.75	2.54826e-06
		388.5	1.29027e-06
		390.25	6.51699e-07
		392	3.80255e-07
		393.75	3.1753e-07
		395.5	3.78299e-07
		397.25	5.28935e-07
		399	7.65698e-07
		400.75	1.10271e-06
		402.5	1.5621e-06
		404.25	2.1742e-06
		406	2.97152e-06
		407.75	3.98939e-06
		409.5	5.26361e-06
		411.25	6.82884e-06
		413	8.71692e-06
		414.75	1.09552e-05
		416.5	1.35651e-05
		418.25	1.65616e-05
		420	1.99482e-05
		421.75	2.37197e-05
		423.5	2.78582e-05
		425.25	3.23324e-05
		427	3.70986e-05
		428.75	4.21037e-05
		430.5	4.72912e-05
		432.25	5.26101e-05
		434	5.80228e-05
		435.75	6.35074e-05
		437.5	6.90482e-05
		439.25	7.46097e-05
		441	8.00978e-05
		442.75	8.53155e-05
		444.5	8.9935e-05
		446.25	9.35053e-05
		448	9.55087e-05
		449.75	9.54632e-05
		451.5	9.30462e-05
		453.25	8.82013e-05
		455	8.11884e-05
		456.75	7.25569e-05
		458.5	6.30457e-05
		460.25	5.34436e-05
		462	4.4445e-05
		463.75	3.65547e-05
		465.5	3.00466e-05
		467.25	2.49795e-05
		469	2.12617e-05
		470.75	1.87251e-05
		472.5	1.7199e-05
		474.25	1.65645e-05
		476	1.67842e-05
		477.75	1.79039e-05
		479.5	2.00255e-05
		481.25	2.32532e-05
		483	2.76236e-05
		484.75	3.30317e-05
		486.5	3.91874e-05
		488.25	4.56143e-05
		490	5.17169e-05
		491.75	5.68908e-05
		493.5	6.06599e-05
		495.25	6.27886e-05
		497	6.33291e-05
		498.75	6.25912e-05
		500.5	6.10515e-05
		502.25	5.92253e-05
		504	5.75584e-05
		505.75	5.63484e-05
		507.5	5.57119e-05
		509.25	5.55852e-05
		511	5.57478e-05
		512.75	5.58618e-05
		514.5	5.55277e-05
		516.25	5.43558e-05
		518	5.20462e-05
		519.75	4.84617e-05
		521.5	4.36697e-05
		523.25	3.79382e-05
		525	3.16834e-05
		526.75	2.53826e-05
		528.5	1.94794e-05
		530.25	1.43112e-05
		532	1.00648e-05
		533.75	6.78125e-06
		535.5	4.38545e-06
		537.25	2.73166e-06
		539	1.64844e-06
		540.75	9.72616e-07
		542.5	5.68748e-07
		544.25	3.35601e-07
		546	2.03871e-07
		547.75	1.28938e-07
		549.5	8.65398e-08
		551.25	6.08236e-08
		553	4.42095e-08
		554.75	3.27839e-08
		556.5	2.42036e-08
		558.25	1.93109e-08
		560	1.623e-08
		561.75	1.6104e-08
		563.5	2.08025e-08
		565.25	3.42108e-08
		567	6.36714e-08
		568.75	1.22135e-07
		570.5	2.31078e-07
		572.25	4.23997e-07
		574	7.49876e-07
		575.75	1.27549e-06
		577.5	2.08426e-06
		579.25	3.27324e-06
		581	4.93725e-06
		582.75	7.15275e-06
		584.5	9.95273e-06
		586.25	1.33012e-05
		588	1.70735e-05
		589.75	2.10491e-05
		591.5	2.49245e-05
		593.25	2.83465e-05
		595	3.09638e-05
		596.75	3.24854e-05
		598.5	3.27344e-05
		600.25	3.16811e-05
		602	2.94495e-05
		603.75	2.62927e-05
		605.5	2.25463e-05
		607.25	1.85692e-05
		609	1.46891e-05
		610.75	1.11603e-05
		612.5	8.14401e-06
		614.25	5.70796e-06
		616	3.84242e-06
		617.75	2.48433e-06
		619.5	1.54275e-06
		621.25	9.20155e-07
		623	5.27118e-07
		624.75	2.90025e-07
		626.5	1.53266e-07
		628.25	7.77919e-08
		630	3.79232e-08
		631.75	1.77564e-08
		633.5	7.98523e-09
		635.25	3.44906e-09
		637	1.43085e-09
		638.75	0
		640.5	0
		642.25	0
		644	0
		645.75	0
		647.5	0
		649.25	0
		651	0
		652.75	0
		654.5	0
		656.25	0
		658	0
		659.75	0
		661.5	0
		663.25	0
		665	0
		666.75	0
		668.5	0
		670.25	0
		672	0
		673.75	0
		675.5	0
		677.25	0
		679	0
		680.75	0
		682.5	0
		684.25	1.35901e-09
		686	2.75193e-09
		687.75	5.42872e-09
		689.5	1.04328e-08
		691.25	1.9532e-08
		693	3.69531e-08
		694.75	6.67627e-08
		696.5	1.15794e-07
		698.25	1.97217e-07
		700	3.26898e-07
		701.75	5.29165e-07
		703.5	8.36589e-07
		705.25	1.29204e-06
		707	1.94997e-06
		708.75	2.87702e-06
		710.5	4.15153e-06
		712.25	5.86172e-06
		714	8.10182e-06
		715.75	1.09661e-05
		717.5	1.454e-05
		719.25	1.8889e-05
		721	2.40437e-05
		722.75	2.99842e-05
		724.5	3.66233e-05
		726.25	4.37928e-05
		728	5.12351e-05
		729.75	5.86061e-05
		731.5	6.54915e-05
		733.25	7.14385e-05
		735	7.60016e-05
		736.75	7.87965e-05
		738.5	7.95536e-05
		740.25	7.8161e-05
		742	7.46874e-05
		743.75	6.9378e-05
		745.5	6.26256e-05
		747.25	5.49186e-05
		749	4.67793e-05
		750.75	3.87013e-05
		752.5	3.10993e-05
		754.25	2.42764e-05
		756	1.84126e-05
		757.75	1.35729e-05
		759.5	9.72771e-06
		761.25	6.78133e-06
		763	4.60037e-06
		764.75	3.03858e-06
		766.5	1.95523e-06
		768.25	1.22644e-06
		770	7.50483e-07
		771.75	4.48424e-07
		773.5	2.61997e-07
		775.25	1.50777e-07
		777	8.53372e-08
		778.75	4.80912e-08
		780.5	2.7461e-08
		782.25	1.57192e-08
		784	9.88053e-09
		785.75	7.37139e-09
		787.5	6.16675e-09
		789.25	5.04478e-09
		791	5.21489e-09
		792.75	5.39055e-09
		794.5	6.39118e-09
		796.25	7.12059e-09
		798	9.2856e-09
		799.75	1.1884e-08
		801.5	1.61185e-08
		803.25	2.30145e-08
		805	3.41748e-08
		806.75	5.20557e-08
		808.5	8.03381e-08
		810.25	1.24411e-07
		812	1.91963e-07
		813.75	2.93679e-07
		815.5	4.4397e-07
		817.25	6.61681e-07
		819	9.70626e-07
		820.75	1.39979e-06
		822.5	1.98297e-06
		824.25	2.75874e-06
		826	3.76556e-06
		827.75	5.04167e-06
		829.5	6.62085e-06
		831.25	8.52737e-06
		833	1.07719e-05
		834.75	1.33482e-05
		836.5	1.62308e-05
		838.25	1.93759e-05
		840	2.2725e-05
		841.75	2.62119e-05
		843.5	2.97709e-05
		845.25	3.33474e-05
		847	3.69042e-05
		848.75	4.04252e-05
		850.5	4.39074e-05
		852.25	4.73519e-05
		854	5.07416e-05
		855.75	5.40211e-05
		857.5	5.70793e-05
		859.25	5.97449e-05
		861	6.17982e-05
		862.75	6.30001e-05
		864.5	6.31357e-05
		866.25	6.20595e-05
		868	5.97347e-05
		869.75	5.62521e-05
		871.5	5.18256e-05
		873.25	4.67625e-05
		875	4.14182e-05
		876.75	3.61438e-05
		878.5	3.12405e-05
		880.25	2.69284e-05
		882	2.33338e-05
		883.75	2.0494e-05
		885.5	1.83747e-05
		887.25	1.68933e-05
		889	1.59402e-05
		890.75	1.5401e-05
		892.5	1.51672e-05
		894.25	1.51446e-05
		896	1.52534e-05
		897.75	1.54307e-05
		899.5	1.56269e-05
		901.25	1.58041e-05
		903	1.59335e-05
		904.75	1.59942e-05
		906.5	1.59744e-05
		908.25	1.58661e-05
		910	1.56706e-05
		911.75	1.53929e-05
		913.5	1.5045e-05
		915.25	1.46441e-05
		917	1.42127e-05
		918.75	1.37776e-05
		920.5	1.33694e-05
		922.25	1.30218e-05
		924	1.27702e-05
		925.75	1.26507e-05
		927.5	1.2699e-05
		929.25	1.29481e-05
		931	1.34271e-05
		932.75	1.41586e-05
		934.5	1.51588e-05
		936.25	1.64323e-05
		938	1.79729e-05
		939.75	1.97619e-05
		941.5	2.17675e-05
		943.25	2.3945e-05
		945	2.62378e-05
		946.75	2.85795e-05
		948.5	3.08965e-05
		950.25	3.31129e-05
		952	3.51506e-05
		953.75	3.69389e-05
		955.5	3.84157e-05
		957.25	3.95292e-05
		959	4.0245e-05
		960.75	4.05448e-05
		962.5	4.04275e-05
		964.25	3.99092e-05
		966	3.90208e-05
		967.75	3.78057e-05
		969.5	3.63165e-05
		971.25	3.46113e-05
		973	3.27506e-05
		974.75	3.07935e-05
		976.5	2.87952e-05
		978.25	2.68048e-05
		980	2.48641e-05
		981.75	2.30064e-05
		983.5	2.12569e-05
		985.25	1.96325e-05
		987	1.81434e-05
		988.75	1.67931e-05
		990.5	1.55799e-05
		992.25	1.44996e-05
		994	1.35434e-05
		995.75	1.27011e-05
		997.5	1.19613e-05
		999.25	1.13123e-05
		1001	1.07421e-05
		1002.75	1.02395e-05
		1004.5	9.79347e-06
		1006.25	9.39424e-06
		1008	9.03282e-06
		1009.75	8.70133e-06
		1011.5	8.39289e-06
		1013.25	8.10172e-06
		1015	7.823e-06
		1016.75	7.55288e-06
		1018.5	7.28834e-06
		1020.25	7.02714e-06
		1022	6.7671e-06
		1023.75	6.50877e-06
		1025.5	6.25064e-06
		1027.25	5.99268e-06
		1029	5.73516e-06
		1030.75	5.47856e-06
		1032.5	5.22354e-06
		1034.25	4.97089e-06
		1036	4.72145e-06
		1037.75	4.47609e-06
		1039.5	4.23567e-06
		1041.25	4.00102e-06
		1043	3.77293e-06
		1044.75	3.55152e-06
		1046.5	3.33879e-06
		1048.25	3.13442e-06
		1050	2.93889e-06
		1051.75	2.75258e-06
		1053.5	2.57577e-06
		1055.25	2.40866e-06
		1057	2.25134e-06
		1058.75	2.10384e-06
		1060.5	1.96612e-06
		1062.25	1.83806e-06
		1064	1.71947e-06
		1065.75	1.61014e-06
		1067.5	1.50979e-06
		1069.25	1.4181e-06
		1071	1.33473e-06
		1072.75	1.25932e-06
		1074.5	1.19146e-06
		1076.25	1.13077e-06
		1078	1.07682e-06
		1079.75	1.02922e-06
		1081.5	9.87544e-07
		1083.25	9.51393e-07
		1085	9.2037e-07
		1086.75	8.9409e-07
		1088.5	8.72182e-07
		1090.25	8.54292e-07
		1092	8.4008e-07
		1093.75	8.29228e-07
		1095.5	8.21435e-07
		1097.25	8.16421e-07
		1099	8.13923e-07
		1100.75	8.137e-07
		1102.5	8.15528e-07
		1104.25	8.19203e-07
		1106	8.24537e-07
		1107.75	8.31362e-07
		1109.5	8.39523e-07
		1111.25	8.48882e-07
		1113	8.59313e-07
		1114.75	8.70706e-07
		1116.5	8.82961e-07
		1118.25	8.9599e-07
		1120	9.09716e-07
		1121.75	9.24069e-07
		1123.5	9.38989e-07
		1125.25	9.54423e-07
		1127	9.70326e-07
		1128.75	9.86656e-07
		1130.5	1.00338e-06
		1132.25	1.02046e-06
		1134	1.03789e-06
		1135.75	1.05636e-06
		1137.5	1.07444e-06
		1139.25	1.09279e-06
		1141	1.11141e-06
		1142.75	1.13028e-06
		1144.5	1.1494e-06
		1146.25	1.16808e-06
		1148	1.1878e-06
		1149.75	1.2077e-06
		1151.5	1.2278e-06
		1153.25	1.24809e-06
		1155	1.26857e-06
		1156.75	1.28997e-06
		1158.5	1.31087e-06
		1160.25	1.33195e-06
		1162	1.35321e-06
		1163.75	1.37466e-06
		1165.5	1.39629e-06
		1167.25	1.4181e-06
		1169	1.44009e-06
		1170.75	1.46226e-06
		1172.5	1.4846e-06
		1174.25	1.50711e-06
		1176	1.52979e-06
		1177.75	1.55264e-06
		1179.5	1.57565e-06
		1181.25	1.59883e-06
		1183	1.62217e-06
		1184.75	1.64566e-06
		1186.5	1.66931e-06
		1188.25	1.69311e-06
		1190	1.71707e-06
		1191.75	1.74116e-06
		1193.5	1.76541e-06
		1195.25	1.78979e-06
		1197	1.81432e-06
		1198.75	1.83898e-06
		1200.5	1.86377e-06
		1202.25	1.88869e-06
		1204	1.91374e-06
		1205.75	1.93891e-06
		1207.5	1.9642e-06
		1209.25	1.98961e-06
		1211	2.01514e-06
		1212.75	2.04077e-06
		1214.5	2.06651e-06
		1216.25	2.09235e-06
		1218	2.1183e-06
		1219.75	2.14434e-06
		1221.5	2.17048e-06
		1223.25	2.19671e-06
		1225	2.22302e-06
		1226.75	2.24942e-06
		1228.5	2.27664e-06
		1230.25	2.30324e-06
		1232	2.32991e-06
		1233.75	2.35666e-06
		1235.5	2.38348e-06
		1237.25	2.41037e-06
		1239	2.43731e-06
		1240.75	2.46432e-06
		1242.5	2.49139e-06
		1244.25	2.51851e-06
		1246	2.54568e-06
		1247.75	2.57289e-06
		1249.5	2.60015e-06
		1251.25	2.62746e-06
		1253	2.6548e-06
		1254.75	2.68217e-06
		1256.5	2.70958e-06
		1258.25	2.73702e-06
		1260	2.76449e-06
		1261.75	2.79198e-06
		1263.5	2.81949e-06
		1265.25	2.84702e-06
		1267	2.87457e-06
		1268.75	2.90214e-06
		1270.5	2.92971e-06
		1272.25	2.9573e-06
		1274	2.98489e-06
		1275.75	3.01249e-06
		1277.5	3.04009e-06
		1279.25	3.0677e-06
		1281	3.0953e-06
		1282.75	3.12291e-06
		1284.5	3.15051e-06
		1286.25	3.1781e-06
		1288	3.20569e-06
		1289.75	3.23327e-06
		1291.5	3.26085e-06
		1293.25	3.28841e-06
		1295	3.31597e-06
		1296.75	3.34351e-06
		1298.5	3.37179e-06
		1300.25	3.39938e-06
		1302	3.42696e-06
		1303.75	3.45454e-06
		1305.5	3.48211e-06
		1307.25	3.50967e-06
		1309	3.53723e-06
		1310.75	3.56479e-06
		1312.5	3.59312e-06
		1314.25	3.62074e-06
		1316	3.64838e-06
		1317.75	3.67602e-06
		1319.5	3.70367e-06
		1321.25	3.73134e-06
		1323	3.75902e-06
		1324.75	3.78672e-06
		1326.5	3.81445e-06
		1328.25	3.8422e-06
		1330	3.86999e-06
		1331.75	3.89781e-06
		1333.5	3.92567e-06
		1335.25	3.95358e-06
		1337	3.98153e-06
		1338.75	4.00954e-06
		1340.5	4.03837e-06
		1342.25	4.06656e-06
		1344	4.09483e-06
		1345.75	4.12318e-06
		1347.5	4.15162e-06
		1349.25	4.18016e-06
		1351	4.20881e-06
		1352.75	4.23758e-06
		1354.5	4.26646e-06
		1356.25	4.29549e-06
		1358	4.32466e-06
		1359.75	4.35398e-06
		1361.5	4.38346e-06
		1363.25	4.41312e-06
		1365	4.44297e-06
		1366.75	4.47301e-06
		1368.5	4.50327e-06
		1370.25	4.53375e-06
		1372	4.56447e-06
		1373.75	4.59544e-06
		1375.5	4.62667e-06
		1377.25	4.65819e-06
		1379	4.69e-06
		1380.75	4.72212e-06
		1382.5	4.75457e-06
		1384.25	4.78737e-06
		1386	4.82052e-06
		1387.75	4.85406e-06
		1389.5	4.888e-06
		1391.25	4.92236e-06
		1393	4.95715e-06
		1394.75	4.9924e-06
		1396.5	5.02814e-06
		1398.25	5.06437e-06
		1400	5.10113e-06
		1401.75	5.13843e-06
		1403.5	5.1763e-06
		1405.25	5.21476e-06
		1407	5.25458e-06
		1408.75	5.29434e-06
		1410.5	5.33476e-06
		1412.25	5.37588e-06
		1414	5.41772e-06
		1415.75	5.46031e-06
		1417.5	5.50367e-06
		1419.25	5.54784e-06
		1421	5.59284e-06
		1422.75	5.63942e-06
		1424.5	5.68623e-06
		1426.25	5.73398e-06
		1428	5.78268e-06
		1429.75	5.83236e-06
		1431.5	5.88307e-06
		1433.25	5.93483e-06
		1435	5.98767e-06
		1436.75	6.04163e-06
		1438.5	6.09673e-06
		1440.25	6.15302e-06
		1442	6.21052e-06
		1443.75	6.26927e-06
		1445.5	6.32929e-06
		1447.25	6.39063e-06
		1449	6.45332e-06
		1450.75	6.51739e-06
		1452.5	6.58287e-06
		1454.25	6.64979e-06
		1456	6.71819e-06
		1457.75	6.78809e-06
		1459.5	6.85954e-06
		1461.25	6.93256e-06
		1463	7.00719e-06
		1464.75	7.08344e-06
		1466.5	7.16136e-06
		1468.25	7.24096e-06
		1470	7.32229e-06
		1471.75	7.40535e-06
		1473.5	7.49019e-06
		1475.25	7.57682e-06
		1477	7.66527e-06
		1478.75	7.75556e-06
		1480.5	7.84771e-06
		1482.25	7.94174e-06
		1484	8.03767e-06
		1485.75	8.13551e-06
		1487.5	8.23529e-06
		1489.25	8.337e-06
		1491	8.44066e-06
		1492.75	8.54629e-06
		1494.5	8.65388e-06
		1496.25	8.76345e-06
		1498	8.87499e-06
		1499.75	8.98851e-06
		1501.5	9.104e-06
		1503.25	9.22146e-06
		1505	9.34161e-06
		1506.75	9.46305e-06
		1508.5	9.58644e-06
		1510.25	9.71176e-06
		1512	9.83899e-06
		1513.75	9.96812e-06
		1515.5	1.00991e-05
		1517.25	1.02319e-05
		1519	1.03666e-05
		1520.75	1.0503e-05
		1522.5	1.06412e-05
		1524.25	1.07811e-05
		1526	1.09227e-05
		1527.75	1.10659e-05
		1529.5	1.12107e-05
		1531.25	1.1357e-05
		1533	1.15047e-05
		1534.75	1.16539e-05
		1536.5	1.18045e-05
		1538.25	1.19564e-05
		1540	1.21095e-05
		1541.75	1.22637e-05
		1543.5	1.24191e-05
		1545.25	1.25755e-05
		1547	1.27328e-05
		1548.75	1.2891e-05
		1550.5	1.305e-05
		1552.25	1.32097e-05
		1554	1.33701e-05
		1555.75	1.35317e-05
		1557.5	1.3693e-05
		1559.25	1.38548e-05
		1561	1.40167e-05
		1562.75	1.41789e-05
		1564.5	1.43411e-05
		1566.25	1.45033e-05
		1568	1.46654e-05
		1569.75	1.48273e-05
		1571.5	1.49888e-05
		1573.25	1.515e-05
		1575	1.53106e-05
		1576.75	1.54705e-05
		1578.5	1.56298e-05
		1580.25	1.57882e-05
		1582	1.59457e-05
		1583.75	1.61022e-05
		1585.5	1.62575e-05
		1587.25	1.64116e-05
		1589	1.65644e-05
		1590.75	1.67158e-05
		1592.5	1.68656e-05
		1594.25	1.70138e-05
		1596	1.71604e-05
		1597.75	1.73051e-05
		1599.5	1.74479e-05
		1601.25	1.75888e-05
		1603	1.77283e-05
		1604.75	1.7865e-05
		1606.5	1.79996e-05
		1608.25	1.81318e-05
		1610	1.82617e-05
		1611.75	1.83891e-05
		1613.5	1.85141e-05
		1615.25	1.86365e-05
		1617	1.87563e-05
		1618.75	1.88734e-05
		1620.5	1.89878e-05
		1622.25	1.90995e-05
		1624	1.92083e-05
		1625.75	1.93143e-05
		1627.5	1.94175e-05
		1629.25	1.95177e-05
		1631	1.96149e-05
		1632.75	1.97092e-05
		1634.5	1.98005e-05
		1636.25	1.98889e-05
		1638	1.99742e-05
		1639.75	2.00565e-05
		1641.5	2.01358e-05
		1643.25	2.02121e-05
		1645	2.02853e-05
		1646.75	2.03556e-05
		1648.5	2.04229e-05
		1650.25	2.04873e-05
		1652	2.05486e-05
		1653.75	2.06071e-05
		1655.5	2.06627e-05
		1657.25	2.07154e-05
		1659	2.07653e-05
		1660.75	2.08123e-05
		1662.5	2.08567e-05
		1664.25	2.0899e-05
		1666	2.0938e-05
		1667.75	2.09744e-05
		1669.5	2.10082e-05
		1671.25	2.10395e-05
		1673	2.10684e-05
		1674.75	2.10948e-05
		1676.5	2.11189e-05
		1678.25	2.11406e-05
		1680	2.11602e-05
		1681.75	2.11775e-05
		1683.5	2.11928e-05
		1685.25	2.1206e-05
		1687	2.12171e-05
		1688.75	2.12264e-05
		1690.5	2.12337e-05
		1692.25	2.12393e-05
		1694	2.12431e-05
		1695.75	2.12451e-05
		1697.5	2.12456e-05
		1699.25	2.12444e-05
		1701	2.12417e-05
		1702.75	2.12376e-05
		1704.5	2.1232e-05
		1706.25	2.1225e-05
		1708	2.12167e-05
		1709.75	2.12072e-05
		1711.5	2.11964e-05
		1713.25	2.11844e-05
		1715	2.11713e-05
		1716.75	2.1157e-05
		1718.5	2.11417e-05
		1720.25	2.11254e-05
		1722	2.1108e-05
		1723.75	2.10897e-05
		1725.5	2.10705e-05
		1727.25	2.10503e-05
		1729	2.10292e-05
		1730.75	2.10073e-05
		1732.5	2.09845e-05
		1734.25	2.09609e-05
		1736	2.09364e-05
		1737.75	2.09111e-05
		1739.5	2.08857e-05
		1741.25	2.08589e-05
		1743	2.08312e-05
		1744.75	2.08027e-05
		1746.5	2.07735e-05
		1748.25	2.07434e-05
		1750	2.07125e-05
		1751.75	2.06809e-05
		1753.5	2.06484e-05
		1755.25	2.06151e-05
		1757	2.05809e-05
		1758.75	2.05459e-05
		1760.5	2.05101e-05
		1762.25	2.04733e-05
		1764	2.04357e-05
		1765.75	2.03972e-05
		1767.5	2.03577e-05
		1769.25	2.03174e-05
		1771	2.0276e-05
		1772.75	2.02344e-05
		1774.5	2.01912e-05
		1776.25	2.01469e-05
		1778	2.01017e-05
		1779.75	2.00554e-05
		1781.5	2.0008e-05
		1783.25	1.99596e-05
		1785	1.99101e-05
		1786.75	1.98595e-05
		1788.5	1.98078e-05
		1790.25	1.97549e-05
		1792	1.97009e-05
		1793.75	1.96458e-05
		1795.5	1.95895e-05
		1797.25	1.9532e-05
		1799	1.94734e-05
		1800.75	1.94136e-05
		1802.5	1.93526e-05
		1804.25	1.92904e-05
		1806	1.9227e-05
		1807.75	1.91624e-05
		1809.5	1.90967e-05
		1811.25	1.90298e-05
		1813	1.89617e-05
		1814.75	1.88924e-05
		1816.5	1.8822e-05
		1818.25	1.87504e-05
		1820	1.86777e-05
		1821.75	1.86039e-05
		1823.5	1.8529e-05
		1825.25	1.8453e-05
		1827	1.8376e-05
		1828.75	1.82979e-05
		1830.5	1.82188e-05
		1832.25	1.81387e-05
		1834	1.80576e-05
		1835.75	1.79756e-05
		1837.5	1.78927e-05
		1839.25	1.78089e-05
		1841	1.77243e-05
		1842.75	1.76388e-05
		1844.5	1.75526e-05
		1846.25	1.74656e-05
		1848	1.7378e-05
		1849.75	1.72896e-05
		1851.5	1.72021e-05
		1853.25	1.71141e-05
		1855	1.70273e-05
		1856.75	1.6943e-05
		1858.5	1.68641e-05
		1860.25	1.67949e-05
		1862	1.67428e-05
		1863.75	1.6719e-05
		1865.5	1.67405e-05
		1867.25	1.68314e-05
		1869	1.70243e-05
		1870.75	1.73611e-05
		1872.5	1.78922e-05
		1874.25	1.86733e-05
		1876	1.97609e-05
		1877.75	2.12033e-05
		1879.5	2.30308e-05
		1881.25	2.52436e-05
		1883	2.78019e-05
		1884.75	3.06184e-05
		1886.5	3.35574e-05
		1888.25	3.64417e-05
		1890	3.90672e-05
		1891.75	4.1226e-05
		1893.5	4.27313e-05
		1895.25	4.34439e-05
		1897	4.32914e-05
		1898.75	4.22796e-05
		1900.5	4.04914e-05
		1902.25	3.80743e-05
		1904	3.52197e-05
		1905.75	3.21369e-05
		1907.5	2.90271e-05
		1909.25	2.60627e-05
		1911	2.33726e-05
		1912.75	2.10372e-05
		1914.5	1.90903e-05
		1916.25	1.75258e-05
		1918	1.63119e-05
		1919.75	1.53978e-05
		1921.5	1.47268e-05
		1923.25	1.42436e-05
		1925	1.38992e-05
		1926.75	1.3653e-05
		1928.5	1.34738e-05
		1930.25	1.33387e-05
		1932	1.32317e-05
		1933.75	1.31429e-05
		1935.5	1.30644e-05
		1937.25	1.29925e-05
		1939	1.2925e-05
		1940.75	1.28604e-05
		1942.5	1.27976e-05
		1944.25	1.27376e-05
		1946	1.26792e-05
		1947.75	1.26225e-05
		1949.5	1.25673e-05
		1951.25	1.25138e-05
		1953	1.2462e-05
		1954.75	1.24119e-05
		1956.5	1.23636e-05
		1958.25	1.23169e-05
		1960	1.2272e-05
		1961.75	1.22282e-05
		1963.5	1.21869e-05
		1965.25	1.21473e-05
		1967	1.21096e-05
		1968.75	1.20736e-05
		1970.5	1.20387e-05
		1972.25	1.20064e-05
		1974	1.19758e-05
		1975.75	1.1947e-05
		1977.5	1.192e-05
		1979.25	1.18947e-05
		1981	1.18711e-05
		1982.75	1.18492e-05
		1984.5	1.18291e-05
		1986.25	1.18113e-05
		1988	1.17946e-05
		1989.75	1.17795e-05
		1991.5	1.1766e-05
		1993.25	1.1754e-05
		1995	1.17436e-05
		1996.75	1.17347e-05
		1998.5	1.17273e-05
		2000.25	1.17212e-05
		2002	1.17165e-05
		2003.75	1.17131e-05
		2005.5	1.1711e-05
		2007.25	1.17101e-05
		2009	1.17104e-05
		2010.75	1.17117e-05
		2012.5	1.17141e-05
		2014.25	1.17174e-05
		2016	1.17217e-05
		2017.75	1.17268e-05
		2019.5	1.17334e-05
		2021.25	1.17399e-05
		2023	1.17471e-05
		2024.75	1.17549e-05
		2026.5	1.17631e-05
		2028.25	1.17718e-05
		2030	1.17807e-05
		2031.75	1.17899e-05
		2033.5	1.17993e-05
		2035.25	1.18088e-05
		2037	1.18183e-05
		2038.75	1.18277e-05
		2040.5	1.1837e-05
		2042.25	1.1846e-05
		2044	1.18556e-05
		2045.75	1.18641e-05
		2047.5	1.18721e-05
		2049.25	1.18804e-05
		2051	1.18873e-05
		2052.75	1.18944e-05
		2054.5	1.19001e-05
		2056.25	1.1905e-05
		2058	1.1909e-05
		2059.75	1.19122e-05
		2061.5	1.19144e-05
		2063.25	1.19156e-05
		2065	1.19157e-05
		2066.75	1.19148e-05
		2068.5	1.19126e-05
		2070.25	1.19093e-05
		2072	1.19047e-05
		2073.75	1.18989e-05
		2075.5	1.18918e-05
		2077.25	1.18834e-05
		2079	1.18736e-05
		2080.75	1.18624e-05
		2082.5	1.18507e-05
		2084.25	1.18369e-05
		2086	1.18216e-05
		2087.75	1.18051e-05
		2089.5	1.17871e-05
		2091.25	1.17678e-05
		2093	1.17479e-05
		2094.75	1.1726e-05
		2096.5	1.17029e-05
		2098.25	1.16784e-05
		2100	1.16528e-05
		2101.75	1.16259e-05
		2103.5	1.1598e-05
		2105.25	1.15689e-05
		2107	1.15388e-05
		2108.75	1.15085e-05
		2110.5	1.14765e-05
		2112.25	1.14438e-05
		2114	1.14102e-05
		2115.75	1.1376e-05
		2117.5	1.13405e-05
		2119.25	1.13052e-05
		2121	1.12694e-05
		2122.75	1.12333e-05
		2124.5	1.11969e-05
		2126.25	1.11604e-05
		2128	1.11238e-05
		2129.75	1.10872e-05
		2131.5	1.10507e-05
		2133.25	1.10145e-05
		2135	1.09787e-05
		2136.75	1.09433e-05
		2138.5	1.09085e-05
		2140.25	1.08744e-05
		2142	1.08411e-05
		2143.75	1.0808e-05
		2145.5	1.07767e-05
		2147.25	1.07466e-05
		2149	1.07177e-05
		2150.75	1.06902e-05
		2152.5	1.06642e-05
		2154.25	1.06399e-05
		2156	1.06172e-05
		2157.75	1.05964e-05
		2159.5	1.05769e-05
		2161.25	1.05602e-05
		2163	1.05456e-05
		2164.75	1.05334e-05
		2166.5	1.05235e-05
		2168.25	1.05161e-05
		2170	1.05113e-05
		2171.75	1.05092e-05
		2173.5	1.05099e-05
		2175.25	1.05134e-05
		2177	1.05199e-05
		2178.75	1.05295e-05
		2180.5	1.05422e-05
		2182.25	1.05581e-05
		2184	1.05772e-05
		2185.75	1.05997e-05
		2187.5	1.06256e-05
		2189.25	1.0655e-05
		2191	1.06878e-05
		2192.75	1.07243e-05
		2194.5	1.07643e-05
		2196.25	1.08079e-05
		2198	1.08552e-05
		2199.75	1.09062e-05
		2201.5	1.09609e-05
		2203.25	1.10193e-05
		2205	1.10815e-05
		2206.75	1.11473e-05
		2208.5	1.12169e-05
		2210.25	1.12902e-05
		2212	1.13665e-05
		2213.75	1.14473e-05
		2215.5	1.15324e-05
		2217.25	1.16204e-05
		2219	1.17119e-05
		2220.75	1.18063e-05
		2222.5	1.19049e-05
		2224.25	1.20069e-05
		2226	1.21122e-05
		2227.75	1.22208e-05
		2229.5	1.23325e-05
		2231.25	1.24474e-05
		2233	1.25652e-05
		2234.75	1.26859e-05
		2236.5	1.28102e-05
		2238.25	1.29366e-05
		2240	1.30655e-05
		2241.75	1.31969e-05
		2243.5	1.33306e-05
		2245.25	1.34659e-05
		2247	1.36039e-05
		2248.75	1.3744e-05
		2250.5	1.38858e-05
		2252.25	1.40293e-05
		2254	1.41743e-05
		2255.75	1.43206e-05
		2257.5	1.44682e-05
		2259.25	1.46167e-05
		2261	1.47655e-05
		2262.75	1.49156e-05
		2264.5	1.50663e-05
		2266.25	1.52167e-05
		2268	1.5368e-05
		2269.75	1.55193e-05
		2271.5	1.56704e-05
		2273.25	1.58212e-05
		2275	1.59715e-05
		2276.75	1.6121e-05
		2278.5	1.62698e-05
		2280.25	1.64174e-05
		2282	1.65639e-05
		2283.75	1.67089e-05
		2285.5	1.68524e-05
		2287.25	1.69941e-05
		2289	1.71339e-05
		2290.75	1.7271e-05
		2292.5	1.74065e-05
		2294.25	1.75396e-05
		2296	1.76701e-05
		2297.75	1.77979e-05
		2299.5	1.79229e-05
		2301.25	1.80448e-05
		2303	1.81636e-05
		2304.75	1.82791e-05
		2306.5	1.83911e-05
		2308.25	1.84996e-05
		2310	1.86044e-05
		2311.75	1.87055e-05
		2313.5	1.88026e-05
		2315.25	1.88965e-05
		2317	1.89856e-05
		2318.75	1.90706e-05
		2320.5	1.9152e-05
		2322.25	1.92285e-05
		2324	1.93006e-05
		2325.75	1.93682e-05
		2327.5	1.94314e-05
		2329.25	1.94901e-05
		2331	1.95441e-05
		2332.75	1.95937e-05
		2334.5	1.96386e-05
		2336.25	1.96789e-05
		2338	1.97146e-05
		2339.75	1.97457e-05
		2341.5	1.97722e-05
		2343.25	1.97942e-05
		2345	1.98116e-05
		2346.75	1.98246e-05
		2348.5	1.98331e-05
		2350.25	1.98373e-05
		2352	1.98379e-05
		2353.75	1.98335e-05
		2355.5	1.98251e-05
		2357.25	1.98125e-05
		2359	1.9796e-05
		2360.75	1.97756e-05
		2362.5	1.97515e-05
		2364.25	1.97236e-05
		2366	1.96923e-05
		2367.75	1.96575e-05
		2369.5	1.96195e-05
		2371.25	1.95783e-05
		2373	1.95341e-05
		2374.75	1.9487e-05
		2376.5	1.94372e-05
		2378.25	1.93848e-05
		2380	1.933e-05
		2381.75	1.9273e-05
		2383.5	1.92139e-05
		2385.25	1.91528e-05
		2387	1.909e-05
		2388.75	1.90256e-05
		2390.5	1.89598e-05
		2392.25	1.88926e-05
		2394	1.88244e-05
		2395.75	1.87553e-05
		2397.5	1.86847e-05
		2399.25	1.86143e-05
		2401	1.85434e-05
		2402.75	1.84723e-05
		2404.5	1.84004e-05
		2406.25	1.83292e-05
		2408	1.82583e-05
		2409.75	1.81878e-05
		2411.5	1.81178e-05
		2413.25	1.80484e-05
		2415	1.798e-05
		2416.75	1.79124e-05
		2418.5	1.7846e-05
		2420.25	1.77816e-05
		2422	1.77179e-05
		2423.75	1.76558e-05
		2425.5	1.75952e-05
		2427.25	1.75364e-05
		2429	1.74795e-05
		2430.75	1.74246e-05
		2432.5	1.73717e-05
		2434.25	1.7321e-05
		2436	1.72726e-05
		2437.75	1.72265e-05
		2439.5	1.71829e-05
		2441.25	1.71418e-05
		2443	1.71032e-05
		2444.75	1.70673e-05
		2446.5	1.7034e-05
		2448.25	1.70036e-05
		2450	1.69759e-05
		2451.75	1.6951e-05
		2453.5	1.6929e-05
		2455.25	1.69099e-05
		2457	1.68937e-05
		2458.75	1.68805e-05
		2460.5	1.68702e-05
		2462.25	1.68628e-05
		2464	1.68585e-05
		2465.75	1.68571e-05
		2467.5	1.68586e-05
		2469.25	1.68631e-05
		2471	1.68705e-05
		2472.75	1.68809e-05
		2474.5	1.68941e-05
		2476.25	1.69102e-05
		2478	1.69291e-05
		2479.75	1.69508e-05
		2481.5	1.69753e-05
		2483.25	1.70025e-05
		2485	1.70324e-05
		2486.75	1.70649e-05
		2488.5	1.70999e-05
		2490.25	1.71375e-05
		2492	1.71775e-05
		2493.75	1.722e-05
		2495.5	1.72648e-05
		2497.25	1.73119e-05
		2499	1.73612e-05
		2500.75	1.74126e-05
		2502.5	1.74662e-05
		2504.25	1.75218e-05
		2506	1.75793e-05
		2507.75	1.76386e-05
		2509.5	1.76998e-05
		2511.25	1.77627e-05
		2513	1.78273e-05
		2514.75	1.78934e-05
		2516.5	1.79611e-05
		2518.25	1.80301e-05
		2520	1.80998e-05
		2521.75	1.81715e-05
		2523.5	1.82443e-05
		2525.25	1.83183e-05
		2527	1.83933e-05
		2528.75	1.84692e-05
		2530.5	1.85459e-05
		2532.25	1.86234e-05
		2534	1.87016e-05
		2535.75	1.87804e-05
		2537.5	1.88598e-05
		2539.25	1.89395e-05
		2541	1.90196e-05
		2542.75	1.90999e-05
		2544.5	1.91805e-05
		2546.25	1.92611e-05
		2548	1.93417e-05
		2549.75	1.94222e-05
		2551.5	1.95026e-05
		2553.25	1.95827e-05
		2555	1.96625e-05
		2556.75	1.97418e-05
		2558.5	1.98206e-05
		2560.25	1.98988e-05
		2562	1.99763e-05
		2563.75	2.00531e-05
		2565.5	2.0129e-05
		2567.25	2.02039e-05
		2569	2.02777e-05
		2570.75	2.03505e-05
		2572.5	2.0422e-05
		2574.25	2.04916e-05
		2576	2.05604e-05
		2577.75	2.06278e-05
		2579.5	2.06937e-05
		2581.25	2.07579e-05
		2583	2.08203e-05
		2584.75	2.0881e-05
		2586.5	2.09397e-05
		2588.25	2.09965e-05
		2590	2.10513e-05
		2591.75	2.1104e-05
		2593.5	2.11545e-05
		2595.25	2.12028e-05
		2597	2.12486e-05
		2598.75	2.12921e-05
		2600.5	2.1333e-05
		2602.25	2.13713e-05
		2604	2.14071e-05
		2605.75	2.14401e-05
		2607.5	2.14703e-05
		2609.25	2.14977e-05
		2611	2.15222e-05
		2612.75	2.15438e-05
		2614.5	2.15623e-05
		2616.25	2.15778e-05
		2618	2.15902e-05
		2619.75	2.15995e-05
		2621.5	2.16056e-05
		2623.25	2.16085e-05
		2625	2.16081e-05
		2626.75	2.16044e-05
		2628.5	2.15973e-05
		2630.25	2.15869e-05
		2632	2.15732e-05
		2633.75	2.1556e-05
		2635.5	2.15355e-05
		2637.25	2.15115e-05
		2639	2.1484e-05
		2640.75	2.14531e-05
		2642.5	2.14188e-05
		2644.25	2.1381e-05
		2646	2.13398e-05
		2647.75	2.12938e-05
		2649.5	2.12451e-05
		2651.25	2.11938e-05
		2653	2.11391e-05
		2654.75	2.1081e-05
		2656.5	2.10195e-05
		2658.25	2.09547e-05
		2660	2.08867e-05
		2661.75	2.08153e-05
		2663.5	2.07408e-05
		2665.25	2.06631e-05
		2667	2.05822e-05
		2668.75	2.04983e-05
		2670.5	2.04114e-05
		2672.25	2.03214e-05
		2674	2.02286e-05
		2675.75	2.01329e-05
		2677.5	2.00345e-05
		2679.25	1.99333e-05
		2681	1.98294e-05
		2682.75	1.9723e-05
		2684.5	1.96141e-05
		2686.25	1.95027e-05
		2688	1.9389e-05
		2689.75	1.92731e-05
		2691.5	1.91549e-05
		2693.25	1.90347e-05
		2695	1.89124e-05
		2696.75	1.87882e-05
		2698.5	1.86622e-05
		2700.25	1.85344e-05
		2702	1.8405e-05
		2703.75	1.8274e-05
		2705.5	1.81416e-05
		2707.25	1.80078e-05
		2709	1.78728e-05
		2710.75	1.77366e-05
		2712.5	1.75994e-05
		2714.25	1.74612e-05
		2716	1.73222e-05
		2717.75	1.71824e-05
		2719.5	1.70419e-05
		2721.25	1.69009e-05
		2723	1.67595e-05
		2724.75	1.66178e-05
		2726.5	1.64758e-05
		2728.25	1.63337e-05
		2730	1.61915e-05
		2731.75	1.60495e-05
		2733.5	1.59076e-05
		2735.25	1.5766e-05
		2737	1.56247e-05
		2738.75	1.54839e-05
		2740.5	1.53438e-05
		2742.25	1.52042e-05
		2744	1.50654e-05
		2745.75	1.49275e-05
		2747.5	1.47905e-05
		2749.25	1.46545e-05
		2751	1.45197e-05
		2752.75	1.4386e-05
		2754.5	1.42536e-05
		2756.25	1.41226e-05
		2758	1.3993e-05
		2759.75	1.38642e-05
		2761.5	1.37376e-05
		2763.25	1.36127e-05
		2765	1.34895e-05
		2766.75	1.33681e-05
		2768.5	1.32484e-05
		2770.25	1.31306e-05
		2772	1.30147e-05
		2773.75	1.29007e-05
		2775.5	1.2788e-05
		2777.25	1.2678e-05
		2779	1.25701e-05
		2780.75	1.24643e-05
		2782.5	1.23605e-05
		2784.25	1.22588e-05
		2786	1.21592e-05
		2787.75	1.20618e-05
		2789.5	1.19665e-05
		2791.25	1.18733e-05
		2793	1.17822e-05
		2794.75	1.16932e-05
		2796.5	1.16063e-05
		2798.25	1.15215e-05
		2800	1.14387e-05
		2801.75	1.13579e-05
		2803.5	1.12791e-05
		2805.25	1.12023e-05
		2807	1.11273e-05
		2808.75	1.10542e-05
		2810.5	1.0983e-05
		2812.25	1.09134e-05
		2814	1.08456e-05
		2815.75	1.07794e-05
		2817.5	1.07148e-05
		2819.25	1.06517e-05
		2821	1.059e-05
		2822.75	1.0529e-05
		2824.5	1.04701e-05
		2826.25	1.04123e-05
		2828	1.03556e-05
		2829.75	1.03e-05
		2831.5	1.02447e-05
		2833.25	1.0191e-05
		2835	1.0138e-05
		2836.75	1.00858e-05
		2838.5	1.00341e-05
		2840.25	9.98298e-06
		2842	9.93225e-06
		2843.75	9.88185e-06
		2845.5	9.83168e-06
		2847.25	9.78166e-06
		2849	9.73169e-06
		2850.75	9.68169e-06
		2852.5	9.63156e-06
		2854.25	9.58122e-06
		2856	9.53058e-06
		2857.75	9.47955e-06
		2859.5	9.42806e-06
		2861.25	9.37603e-06
		2863	9.32337e-06
		2864.75	9.27001e-06
		2866.5	9.21588e-06
		2868.25	9.1609e-06
		2870	9.10502e-06
		2871.75	9.04816e-06
		2873.5	8.99026e-06
		2875.25	8.93128e-06
		2877	8.87115e-06
		2878.75	8.80984e-06
		2880.5	8.74728e-06
		2882.25	8.68344e-06
		2884	8.61829e-06
		2885.75	8.55179e-06
		2887.5	8.48391e-06
		2889.25	8.41463e-06
		2891	8.34393e-06
		2892.75	8.27179e-06
		2894.5	8.1982e-06
		2896.25	8.12315e-06
		2898	8.04665e-06
		2899.75	7.9687e-06
		2901.5	7.88929e-06
		2903.25	7.80845e-06
		2905	7.72551e-06
		2906.75	7.6419e-06
		2908.5	7.55691e-06
		2910.25	7.47055e-06
		2912	7.38286e-06
		2913.75	7.29388e-06
		2915.5	7.20364e-06
		2917.25	7.11218e-06
		2919	7.01955e-06
		2920.75	6.9258e-06
		2922.5	6.83098e-06
		2924.25	6.73515e-06
		2926	6.63835e-06
		2927.75	6.54064e-06
		2929.5	6.4421e-06
		2931.25	6.34278e-06
		2933	6.24204e-06
		2934.75	6.14142e-06
		2936.5	6.04022e-06
		2938.25	5.93851e-06
		2940	5.83635e-06
		2941.75	5.73381e-06
		2943.5	5.63098e-06
		2945.25	5.52792e-06
		2947	5.42403e-06
		2948.75	5.32077e-06
		2950.5	5.21751e-06
		2952.25	5.11431e-06
		2954	5.01125e-06
		2955.75	4.90839e-06
		2957.5	4.80581e-06
		2959.25	4.70359e-06
		2961	4.60178e-06
		2962.75	4.50045e-06
		2964.5	4.39968e-06
		2966.25	4.29953e-06
		2968	4.20006e-06
		2969.75	4.10133e-06
		2971.5	4.00341e-06
		2973.25	3.90634e-06
		2975	3.81019e-06
		2976.75	3.71502e-06
		2978.5	3.62086e-06
		2980.25	3.52778e-06
		2982	3.43581e-06
		2983.75	3.34501e-06
		2985.5	3.25541e-06
		2987.25	3.16705e-06
		2989	3.07997e-06
		2990.75	2.99421e-06
		2992.5	2.9098e-06
		2994.25	2.82676e-06
		2996	2.74512e-06
		2997.75	2.66491e-06
		2999.5	2.58615e-06
		3001.25	2.50817e-06
		3003	2.43243e-06
		3004.75	2.35818e-06
		3006.5	2.28543e-06
		3008.25	2.2142e-06
		3010	2.14526e-06
		3011.75	2.07717e-06
		3013.5	2.01062e-06
		3015.25	1.94561e-06
		3017	1.88214e-06
		3018.75	1.82022e-06
		3020.5	1.75983e-06
		3022.25	1.70098e-06
		3024	1.64365e-06
		3025.75	1.58783e-06
		3027.5	1.53352e-06
		3029.25	1.48001e-06
		3031	1.42872e-06
		3032.75	1.3789e-06
		3034.5	1.33053e-06
		3036.25	1.28359e-06
		3038	1.23806e-06
		3039.75	1.19394e-06
		3041.5	1.1512e-06
		3043.25	1.10982e-06
		3045	1.06978e-06
		3046.75	1.03106e-06
		3048.5	9.93646e-07
		3050.25	9.57511e-07
		3052	9.22636e-07
		3053.75	8.88999e-07
		3055.5	8.56579e-07
		3057.25	8.25356e-07
		3059	7.95307e-07
		3060.75	7.66413e-07
		3062.5	7.38653e-07
		3064.25	7.12006e-07
		3066	6.86453e-07
		3067.75	6.61975e-07
		3069.5	6.38552e-07
		3071.25	6.16168e-07
		3073	5.94804e-07
		3074.75	5.74445e-07
		3076.5	5.55073e-07
		3078.25	5.36674e-07
		3080	5.19234e-07
		3081.75	5.02739e-07
		3083.5	4.87177e-07
		3085.25	4.72538e-07
		3087	4.5881e-07
		3088.75	4.45984e-07
		3090.5	4.34052e-07
		3092.25	4.23008e-07
		3094	4.12844e-07
		3095.75	4.03558e-07
		3097.5	3.95144e-07
		3099.25	3.876e-07
		3101	3.80926e-07
		3102.75	3.75121e-07
		3104.5	3.70187e-07
		3106.25	3.66124e-07
		3108	3.62938e-07
		3109.75	3.60633e-07
		3111.5	3.59213e-07
		3113.25	3.58687e-07
		3115	3.59062e-07
		3116.75	3.60347e-07
		3118.5	3.62552e-07
		3120.25	3.65688e-07
		3122	3.69767e-07
		3123.75	3.74802e-07
		3125.5	3.80806e-07
		3127.25	3.87793e-07
		3129	3.9578e-07
		3130.75	4.04781e-07
		3132.5	4.14813e-07
		3134.25	4.25893e-07
		3136	4.38038e-07
		3137.75	4.51266e-07
		3139.5	4.65594e-07
		3141.25	4.81041e-07
		3143	4.97626e-07
		3144.75	5.15365e-07
		3146.5	5.34276e-07
		3148.25	5.54379e-07
		3150	5.75689e-07
		3151.75	5.98223e-07
		3153.5	6.21999e-07
		3155.25	6.4703e-07
		3157	6.73333e-07
		3158.75	7.00921e-07
		3160.5	7.29805e-07
		3162.25	7.59998e-07
		3164	7.9151e-07
		3165.75	8.24349e-07
		3167.5	8.58522e-07
		3169.25	8.94033e-07
		3171	9.30887e-07
		3172.75	9.69085e-07
		3174.5	1.00863e-06
		3176.25	1.0495e-06
		3178	1.09172e-06
		3179.75	1.13526e-06
		3181.5	1.18011e-06
		3183.25	1.22627e-06
		3185	1.27371e-06
		3186.75	1.32242e-06
		3188.5	1.37238e-06
		3190.25	1.42355e-06
		3192	1.47591e-06
		3193.75	1.52944e-06
		3195.5	1.58338e-06
		3197.25	1.63918e-06
		3199	1.69603e-06
		3200.75	1.75386e-06
		3202.5	1.81265e-06
		3204.25	1.87233e-06
		3206	1.93286e-06
		3207.75	1.99417e-06
		3209.5	2.0562e-06
		3211.25	2.11889e-06
		3213	2.18217e-06
		3214.75	2.24597e-06
		3216.5	2.31021e-06
		3218.25	2.37482e-06
		3220	2.43972e-06
		3221.75	2.50483e-06
		3223.5	2.57006e-06
		3225.25	2.63532e-06
		3227	2.70052e-06
		3228.75	2.76558e-06
		3230.5	2.8304e-06
		3232.25	2.89487e-06
		3234	2.95892e-06
		3235.75	3.02243e-06
		3237.5	3.08531e-06
		3239.25	3.14745e-06
		3241	3.20877e-06
		3242.75	3.26915e-06
		3244.5	3.32851e-06
		3246.25	3.38601e-06
		3248	3.44304e-06
		3249.75	3.49873e-06
		3251.5	3.55299e-06
		3253.25	3.60572e-06
		3255	3.65683e-06
		3256.75	3.70622e-06
		3258.5	3.7538e-06
		3260.25	3.79949e-06
		3262	3.8432e-06
		3263.75	3.88485e-06
		3265.5	3.92435e-06
		3267.25	3.96163e-06
		3269	3.99592e-06
		3270.75	4.02859e-06
		3272.5	4.05885e-06
		3274.25	4.08661e-06
		3276	4.11184e-06
		3277.75	4.13449e-06
		3279.5	4.1545e-06
		3281.25	4.17184e-06
		3283	4.18647e-06
		3284.75	4.19836e-06
		3286.5	4.20749e-06
		3288.25	4.21384e-06
		3290	4.2174e-06
		3291.75	4.21816e-06
		3293.5	4.21611e-06
		3295.25	4.21127e-06
		3297	4.20364e-06
		3298.75	4.19323e-06
		3300.5	4.18007e-06
		3302.25	4.16418e-06
		3304	4.14559e-06
		3305.75	4.12434e-06
		3307.5	4.10047e-06
		3309.25	4.07403e-06
		3311	4.04506e-06
		3312.75	4.01363e-06
		3314.5	3.9798e-06
		3316.25	3.94363e-06
		3318	3.90518e-06
		3319.75	3.86454e-06
		3321.5	3.82178e-06
		3323.25	3.77697e-06
		3325	3.73021e-06
		3326.75	3.68088e-06
		3328.5	3.63049e-06
		3330.25	3.57771e-06
		3332	3.52405e-06
		3333.75	3.46889e-06
		3335.5	3.41232e-06
		3337.25	3.35443e-06
		3339	3.29533e-06
		3340.75	3.23511e-06
		3342.5	3.17388e-06
		3344.25	3.11173e-06
		3346	3.04877e-06
		3347.75	2.9851e-06
		3349.5	2.9208e-06
		3351.25	2.85599e-06
		3353	2.79076e-06
		3354.75	2.7252e-06
		3356.5	2.65941e-06
		3358.25	2.59348e-06
		3360	2.52749e-06
		3361.75	2.46155e-06
		3363.5	2.39573e-06
		3365.25	2.33012e-06
		3367	2.26479e-06
		3368.75	2.19984e-06
		3370.5	2.13532e-06
		3372.25	2.07131e-06
		3374	2.00788e-06
		3375.75	1.9451e-06
		3377.5	1.88303e-06
		3379.25	1.82172e-06
		3381	1.76124e-06
		3382.75	1.70163e-06
		3384.5	1.64294e-06
		3386.25	1.58522e-06
		3388	1.52851e-06
		3389.75	1.47285e-06
		3391.5	1.41827e-06
		3393.25	1.3648e-06
		3395	1.31247e-06
		3396.75	1.26131e-06
		3398.5	1.21134e-06
		3400.25	1.16257e-06
		3402	1.11502e-06
		3403.75	1.06871e-06
		3405.5	1.02363e-06
		3407.25	9.79805e-07
		3409	9.3723e-07
		3410.75	8.95909e-07
		3412.5	8.55838e-07
		3414.25	8.17016e-07
		3416	7.79435e-07
		3417.75	7.43088e-07
		3419.5	7.07964e-07
		3421.25	6.7405e-07
		3423	6.41334e-07
		3424.75	6.098e-07
		3426.5	5.7943e-07
		3428.25	5.50205e-07
		3430	5.22107e-07
		3431.75	4.95114e-07
		3433.5	4.69204e-07
		3435.25	4.44353e-07
		3437	4.20538e-07
		3438.75	3.97735e-07
		3440.5	3.75918e-07
		3442.25	3.5506e-07
		3444	3.35137e-07
		3445.75	3.16121e-07
		3447.5	2.97985e-07
		3449.25	2.80703e-07
		3451	2.64247e-07
		3452.75	2.4859e-07
		3454.5	2.33705e-07
		3456.25	2.19565e-07
		3458	2.06143e-07
		3459.75	1.93412e-07
		3461.5	1.81347e-07
		3463.25	1.69922e-07
		3465	1.5911e-07
		3466.75	1.48887e-07
		3468.5	1.39227e-07
		3470.25	1.30108e-07
		3472	1.21506e-07
		3473.75	1.13396e-07
		3475.5	1.05757e-07
		3477.25	9.85673e-08
		3479	9.1805e-08
		3480.75	8.54497e-08
		3482.5	7.94814e-08
		3484.25	7.38807e-08
		3486	6.86289e-08
		3487.75	6.3708e-08
		3489.5	5.91006e-08
		3491.25	5.47899e-08
		3493	5.07597e-08
		3494.75	4.69947e-08
		3496.5	4.34799e-08
		3498.25	4.02013e-08
[truncated: 1 more rows]

## Sheet: Summary
Table A. Sample summary
	Sample	Lithology	**Easting	**Northing	Age (Ma)	*+/-
Ritter Range pendant	HLA-47-B	dacite	309349	4165799	101.3	0.6
	VT15-17-B	hypabyssal dacite	310899	4173760	101.3	0.6
	VT17-2	hypabyssal rhyolite	310612	4173478	101.3	0.9
	NF16-1	rhyolite	304014	4168126	101.9	0.9
	VT16-9	rhyolite	308429	4172229	102.6	0.9
	DL16-58	dacite	304689	4177677	103.3	0.6
	VT16-8	rhyodacite	308743	4172530	103.4	1.9
	VT17-4-B	hypabyssal andesite	311412	4173713	124.2	6.9
	NF16-26-A	rhyolite	303696	4167394	149.2	0.9
	NF16-24	rhyolite	301628	4168597	149.6	0.8
	VT17-1-B	dacite	310158	4173481	151.5	1.1
	EM16-51	rhyolite	308684	4177735	152.4	0.8
	NF16-5	andesite	303859	4167779	158	1.6
	VT17-3-B	andesite	311270	4173727	162.5	1
	VT16-1-B	rhyodacite	313332	4174190	163.4	1.3
	VT15-8	rhyolite	312974	4174470	165.8	1.7
	VT15-7-C	andesite	313156	4174224	166.2	0.8
	VT17-7-B	andesite	312405	4173927	168	0.9
	VT17-6	dacite	311921	4173959	173.1	1.2
	VT17-8-B	dacite	312532	4173972	179.5	1.4
	VT17-5-B	andesite	311681	4173823	201.5	3.6
	VT16-4	rhyodacite	312587	4174005	204.4	1.2
	VT15-15-B	rhyodacite	311528	4173770	206	1.4
	VT16-6	andesite	312613	4174043	209.7	1.9
	VT15-19-A	rhyodacite	309618	4173289	209.9	0.7
	VT15-21-B	andesite	309847	4173327	210.6	1
	VT15-1-B	hypabyssal rhyolite	314507	4174477	215.2	1
	MD17-603	rhyodacite	302977	4198438	216.2	1.1
	VT15-3-B	rhyodacite	314306	4174216	216.2	1
	VT15-2-B	rhyolite	314456	4174402	218.7	0.7
	NR15-3	hypabyssal dacite	308309	4185775	232.6	1.4
Iron Mountain pendant	IMP35B	rhyolite	280037	4152150	-	-
	IMP51A	andesite	280848	4153708	-	-
	IMP55	andesite	278285	4151947	-
Western Metamorphic Belt	WMB5	basalt	230086	4158273	155.2	2.7
	WMB23	andesite	217063	4159339	156.3	3.8
	WMB2	basaltic andesite	231603	4155984	253.3	1.7
	WMB3	basalt	231603	4155984	-
	WMB11	basalt	215526	4177912	-
	WMB17	rhyolite	205606	4177808	-
	WMB18	rhyolite	202955	4174256	-
	WMB22	basalt	209254	4157946	-
	*uncertainty given at 95% confidence interval
	**UTM coordinates given in NAD27 zone 11
	*** - indicates no reliable age estimate

## Sheet: Whole-rock geochemistry
Table B. Whole-rock geochemistry data
WR Sample Name	Zircon Sample Name	Domain	SiO2	Al2O3	Fe2O3(T)	MnO	MgO	CaO	Na2O	K2O	TiO2	P2O5	Total	Sc	Be	V	Cr	Co	Ni	Cu	Zn	Ga	Ge	As	Rb	Sr	Y	Zr	Nb	Mo	Ag	In	Sn	Sb	Cs	Ba	La	Ce	Pr	Nd	Sm	Eu	Gd	Tb	Dy	Ho	Er	Tm	Yb
IMP55	IMP55	IMP	58.5458	20.0526	5.00032	0.112944	3.08028	5.20567	4.29186	2.44369	0.831675	0.21562	99.7805	18.8682		141.135	23.6155		10.2676	4.10704	108.837	18.1326			75.9056	548.295	24.8592	193.159	8.75129							582.504	22.8146	44.1304	5.45708	22.3171	4.78243	1.55952	4.95682	0.701751	4.33789		2.47748		2.46247
IMP35B	IMP35B	IMP	76.6507	13.4691	1.44973	0.0411271	1.19269	2.66298	0.637471	3.65003	0.0616907	0.0205636	99.8361	4.49867		15.6138	3.08454		0	2.05636	32.9017	13.43			136.321	151.031	16.9979	96.2153	14.8567							847.556	32.8599	57.1123	6.16963	21.3907	3.6691	0.596905	2.91807	0.413628	2.73332		1.59869		1.77408
IMP51A	IMP51A	IMP	56.5325	16.128	8.61217	0.179201	6.24039	7.7267	2.29798	0.69572	1.09629	0.242448	99.7514	28.0959		209.282	261.422		68.5178	10.5412	195.012	15.9433			19.1845	618.481	21.4082	176.587	11.0499							286.83	22.0506	41.794	5.22907	20.9306	4.44478	1.01252	4.31194	0.618446	3.7619		2.11379		2.01346
VT15-17-b	VT15-17-b	RRP	65.29	16.14	3.83	0.127	1.05	2.75	4.28	3.79	0.592	0.21	98.64	8	2	50	< 20	9	< 20	< 10	70	16	1.3	6	130	320	22.2	242	8.7	< 2	0.8	< 0.1	1	3.4	3.6	1234	31.8	61.8	6.79	26.3	5.07	1.24	4.2	0.67	3.98	0.77	2.34	0.359	2.43
VT15-23	VT17-2	RRP	75.79	12.56	1.16	0.031	0.13	0.35	4.46	4.33	0.089	0.005	99.06	2	2	5	20	< 1	< 20	< 10	< 30	10	1.3	< 5	130	87	16	88	3.6	4	< 0.5	< 0.1	< 1	1	1.7	1076	29.6	52.7	5.47	18.2	3.13	0.448	2.33	0.41	2.52	0.52	1.59	0.246	1.63
NF16-1	NF16-1	RRP	72.9209	14.6571	1.51834	0.0404891	0.212568	0.495991	4.29184	5.36481	0.22269	0.0303668	99.755	7.13632		15.3144	3.03668		0	0	28.3424	14.6821			122.746	71.862	35.2448	329.032	17.7574							1105.93	37.1703	69.0561	7.85918	29.8474	5.77963	0.72783	5.35396	0.807674	5.19822		3.44292		3.58244
VT15-24	VT16-9	RRP	72.1	14.06	2.62	0.05	0.06	0.85	4.62	5.33	0.166	0.005	100.1	6	2	6	< 20	1	< 20	10	< 30	15	1.3	< 5	146	98	29.5	243	4.4	< 2	0.7	0.3	15	1.7	2.5	1839	37.5	70.9	8.05	30.6	6.04	1.25	5.2	0.84	5.07	1	2.88	0.456	3.08
DL16-58	DL16-58	RRP	69.75	15.41	3.58	0.082	0.81	1.55	4.02	3.59	0.536	0.13	100.1	8	2	24	< 20	4	< 20	< 10	240	18	1.6	7	128	210	26.7	197	9.9	< 2	0.9	< 0.1	2	1.2	12.1	801	33	64.7	7.29	29.9	5.61	1.27	4.25	0.78	4.58	0.89	2.46	0.382	2.67
VT16-8	VT16-8	RRP	69.27	14.5	3.27	0.05	0.29	1.45	5.56	3.61	0.261	0.11	98.99	4	2	5	50	2	< 20	< 10	30	18	1.5	< 5	84	148	25.1	181	7.3	< 2	0.8	< 0.1	1	2.5	1.6	1515	31.2	59.5	6.48	25.1	4.35	0.92	3.76	0.64	3.72	0.79	2.42	0.374	2.5
VT17-4-B	VT17-4-B	RRP	57.37	14.88	7.88	0.156	1.31	6.28	1.54	7.33	1.105	0.33	99.99	20	3	187	30	14	< 20	< 10	60	17	1.5	10	243	207	25.2	106	5.8	< 2	< 0.5	< 0.1	1	11.4	11.5	1214	29.5	53.6	6.36	24.5	5.26	1.5	5.02	0.75	4.44	0.86	2.54	0.365	2.54
NF16-26-b	NF16-26-a	RRP	73.67	14.01	2.79	0.108	0.79	2.27	3.65	2.6	0.317	0.06	100.6	6	2	28	< 20	3	< 20	< 10	60	14	1	11	91	202	22.8	160	8.4	< 2	< 0.5	< 0.1	1	0.8	8.9	955	28.9	57	6.08	20.7	4.08	0.784	3.97	0.63	3.92	0.81	2.49	0.368	2.63
NF16-24	NF16-24	RRP	73.32	13.26	1.88	0.074	0.57	1.08	4.51	3.79	0.19	0.03	99.51	5	2	12	< 20	2	< 20	20	40	15	1.4	< 5	109	83	22	152	7.5	< 2	< 0.5	< 0.1	1	0.4	2	1148	28.6	54.8	5.89	20	3.85	0.578	3.55	0.57	3.57	0.77	2.28	0.357	2.57
VT17-1-B	VT17-1-B	RRP	66.45	16.19	4.79	0.132	1.59	3.36	4.36	2.04	0.713	0.16	100.4	16	2	59	< 20	6	< 20	20	90	17	1.3	< 5	89	489	34.1	177	6.5	< 2	0.6	< 0.1	1	0.8	6.1	804	23.1	46.8	5.71	23.6	5.27	1.4	5.45	0.91	5.49	1.14	3.38	0.511	3.44
EM16-51	EM16-51	RRP	72.07	13.84	2.72	0.092	0.85	1.66	2.66	3.38	0.291	0.1	99.32	6	2	25	< 20	4	< 20	10	60	15	1.3	5	105	329	22.5	157	5.1	< 2	0.7	< 0.1	1	1.7	5	949	22	41.9	4.65	16.8	3.5	0.807	2.9	0.54	3.57	0.74	2.42	0.374	2.71
NF16-5	NF16-5	RRP	57.13	16.22	8.28	0.146	4.06	5.59	3.11	2.95	1.256	0.39	100.2	20	2	165	70	21	40	< 10	130	20	1.7	67	101	450	30.2	209	15.7	4	0.5	< 0.1	2	28.7	13.5	2747	32.8	64.6	7.63	28.4	5.84	1.6	5.91	0.9	5.4	1.03	2.98	0.456	3.05
VT17-3-B	VT17-3-B	RRP	58.2	17.03	6.93	0.102	1.81	1.39	0.81	10.11	0.813	0.23	98.51	18	2	155	30	14	< 20	10	40	18	2	6	451	198	16.1	142	5.5	< 2	< 0.5	< 0.1	< 1	4.2	20.9	2450	19.4	36.2	4.33	17	3.67	1.04	3.16	0.5	2.72	0.57	1.69	0.237	1.6
VT16-1-B	VT16-1-B	RRP	69.74	15.35	3.28	0.116	1.11	3.77	2.02	3.6	0.254	0.12	100.1	5	2	41	< 20	3	< 20	< 10	60	12	1.1	< 5	135	217	13.8	106	6	< 2	< 0.5	< 0.1	1	0.7	14.2	1371	24.7	44.6	4.67	15.5	2.82	0.73	2.36	0.38	2.36	0.46	1.54	0.218	1.57
VT15-8	VT15-8	RRP	70.68	14.38	2.81	0.064	2.13	0.65	4.34	2.24	0.118	0.04	98.84	5	2	16	20	4	< 20	< 10	90	14	1.4	< 5	96	243	17.7	112	6.4	< 2	< 0.5	< 0.1	1	1.1	19.8	2043	32.4	59	6.15	21.9	4.07	0.728	3.49	0.53	3.07	0.62	1.98	0.315	2.2
VT15-7-c	VT15-7-c	RRP	56.76	18.15	7.58	0.185	3.8	3.43	5.11	3.37	0.749	0.28	100.1	18	2	168	20	20	< 20	< 10	150	18	1.8	< 5	114	469	16.2	124	5.3	< 2	< 0.5	< 0.1	< 1	1.2	26.8	1697	21.5	40.3	4.68	19.4	3.95	1.38	3.49	0.53	2.99	0.58	1.71	0.255	1.67
VT17-7-B	VT17-7-B	RRP	57.72	20	5.96	0.106	2.34	1.5	3.79	5.26	0.555	0.13	99.28	14	2	105	< 20	8	< 20	< 10	60	22	1.5	< 5	276	331	22.7	177	9.9	< 2	< 0.5	< 0.1	1	0.6	18	724	35.5	68.3	7.61	27.3	5.16	1.24	4.25	0.65	3.89	0.83	2.61	0.408	2.99
VT17-6	VT17-6	RRP	67.81	15.78	4.22	0.036	0.42	1.21	5.52	3.51	0.372	0.14	99.51	8	2	48	30	5	< 20	< 10	60	12	0.9	< 5	98	178	12.5	99	7.5	< 2	< 0.5	< 0.1	< 1	4.7	3.8	919	23.7	43.9	4.5	15.6	3.01	0.66	2.25	0.35	2.15	0.44	1.21	0.184	1.31
VT17-8-B	VT17-8-B	RRP	64.91	13.48	6.69	0.06	3.34	1.07	3.38	4.87	0.647	0.19	99.5	14	2	126	40	21	< 20	< 10	60	13	1.1	< 5	162	108	15.2	249	6.2	< 2	0.7	< 0.1	1	1.3	15.8	783	22.6	42.1	4.84	18.8	3.64	0.924	3.24	0.49	2.84	0.54	1.54	0.247	1.65
VT17-5-B	VT17-5-B	RRP	60.05	18.34	5.95	0.151	0.65	5.28	4.37	1.97	0.841	0.51	98.86	16	2	77	< 20	10	< 20	30	70	20	1.6	< 5	56	243	37.1	176	7.3	< 2	0.6	< 0.1	2	1.4	6.8	764	28.6	56.6	7	29.1	6.63	1.72	6.84	1.07	6.44	1.31	3.74	0.554	3.61
VT16-4	VT16-4	RRP	68.97	14.89	4.07	0.119	1.62	3	2.19	2.97	0.419	0.08	99.84	9	1	64	< 20	6	< 20	< 10	70	16	1.3	15	115	373	25.7	171	8.4	< 2	< 0.5	< 0.1	2	1.9	20.1	1767	25.3	51.4	5.17	18.8	3.94	0.946	3.87	0.64	4.02	0.82	2.57	0.401	2.76
VT15-15-b	VT15-15-b	RRP	70.06	14.37	3.89	0.061	0.83	1.86	2.09	4.28	0.386	0.09	98.97	7	2	73	< 20	3	< 20	< 10	< 30	12	1.3	< 5	155	183	18.2	167	5.4	< 2	< 0.5	< 0.1	1	1.4	16.5	880	22	41.2	4.6	16.7	3.26	0.824	2.96	0.49	3.05	0.65	1.98	0.31	2.3
VT16-6	VT16-6	RRP	60.72	14.73	6.62	0.265	5.07	5.93	1.68	2.57	0.567	0.12	99.67	20	< 1	126	60	21	40	< 10	90	16	2.1	78	165	415	15.7	86	6.3	< 2	< 0.5	< 0.1	< 1	4.9	55	1066	14.9	30	3.48	13	2.86	0.785	2.77	0.44	2.78	0.57	1.67	0.26	1.76
VT15-19-a	VT15-19-a	RRP	69.68	14.15	3.72	0.088	0.81	3.87	2.44	4.22	0.397	0.1	99.99	7	1	55	50	5	< 20	< 10	40	15	1.7	7	159	163	19.4	141	7.4	< 2	0.6	< 0.1	2	6.9	5.4	765	34.4	63.6	6.73	23.8	4.46	0.966	3.6	0.61	3.75	0.8	2.44	0.365	2.55
VT15-21-b	VT15-21-b	RRP	61.65	19.7	4.81	0.09	1.74	4.73	1.75	4.01	0.567	0.09	100.4	10	2	95	30	10	< 20	< 10	70	18	2.3	< 5	202	180	23.7	177	13.6	< 2	0.5	< 0.1	2	3.3	18.6	1772	33.4	66.9	7.37	27.8	5.03	1.23	4.2	0.7	4.18	0.85	2.61	0.398	2.65
VT15-1-b	VT15-1-b	RRP	66.85	14.75	5.29	0.082	2.54	6.63	0.26	1.99	0.318	0.09	100.7	6	2	57	< 20	5	< 20	30	< 30	16	1.7	6	137	111	16.3	114	3.2	3	< 0.5	< 0.1	1	0.7	15.2	514	28.4	49.2	5.09	17.8	3.19	1.06	2.68	0.41	2.38	0.48	1.41	0.218	1.6
MD17-603	MD17-603	RRP	69.37	13.72	5.75	0.123	1.75	3.28	0.71	3.13	0.534	0.16	99.8	11	2	57	< 20	6	< 20	< 10	100	15	1.9	39	207	136	18.9	97	5.2	< 2	< 0.5	< 0.1	< 1	1.2	29.9	1270	13.8	27.4	3.37	13.7	3.28	0.915	3.14	0.51	3.12	0.65	1.94	0.308	2.09
VT15-3-b	VT15-3-b	RRP	70.12	16.62	2.47	0.121	0.67	1.95	1.66	4.38	0.246	0.07	99.85	4	2	29	20	1	< 20	< 10	40	16	1.1	< 5	168	182	13.2	100	6.9	< 2	< 0.5	< 0.1	1	0.8	13.9	2066	26	40.9	4.12	13.8	2.36	0.56	2.1	0.35	2.19	0.44	1.38	0.22	1.6
VT15-2-b	VT15-2-b	RRP	74.98	13.21	2.1	0.18	0.37	2.07	1.37	4.49	0.118	0.04	99.87	2	2	12	< 20	1	< 20	< 10	40	13	1.2	< 5	198	122	14.1	111	6.2	< 2	< 0.5	< 0.1	2	1.6	14.4	2131	38.4	59.4	5.88	19.7	3.1	0.564	2.37	0.38	2.32	0.47	1.48	0.23	1.6
NR15-3	NR15-3	RRP	65.42	16.23	4.7	0.139	1.67	2.85	2.69	4.97	0.332	0.14	99.97	6	2	53	30	7	< 20	< 10	80	16	1.1	< 5	188	225	11.2	105	7.9	< 2	< 0.5	< 0.1	1	1.8	13.8	2626	32.6	53.9	5.36	18.6	3.07	0.965	2.34	0.34	2	0.4	1.15	0.181	1.28
WMB11	WMB11	WMB	51.2	17.64	9.37	0.154	4.57	6.39	2.89	2.56	0.516	0.11	98.71	35		323	50	24	30	220	90	17	1.7	< 5	60	336	12.8	32	1.1				< 1		1.7	292	7.4	13	1.68	7.66	2.03	0.684	2.12	0.35	2.16	0.43	1.33	0.194	1.33
WMB17	WMB17	WMB	72.28	15.41	1.97	0.019	0.7	0.62	3.84	2.34	0.204	0.07	99.5	4		35	< 20	4	< 20	30	30	18	0.8	< 5	50	391	4.9	55	0.4				< 1		2.9	699	5.28	9.3	1.3	4.9	0.99	0.335	1	0.14	0.82	0.16	0.44	0.063	0.39
WMB18	WMB18	WMB	71.04	12.41	4.3	0.061	2.15	0.92	3	2.65	0.553	0.09	98.97	14		15	< 20	2	< 20	< 10	70	16	1.3	< 5	21	77	54.6	193	2.6				2		0.5	242	14.4	36.5	5.31	23.8	6.68	1.68	7.85	1.47	9.26	1.93	5.73	0.918	6.19
WMB22	WMB22	WMB	49.04	15.8	10.86	0.178	8.2	8.63	3.08	0.23	1.037	0.1	100.6	38		283	300	42	130	20	100	16	1.7	< 5	3	168	17.8	48	0.8				< 1		0.4	63	3.47	9.61	1.54	7.67	2.42	0.942	2.97	0.52	3.31	0.67	1.86	0.281	1.9
WMB3	WMB3	WMB	51.32	18.23	7.86	0.151	5.53	8.76	3.08	1.97	0.55	0.17	99.9	33		243	50	24	20	110	70	16	1.6	7	32	774	16	46	1.6				< 1		0.7	541	12.7	25.7	3.26	14.1	3.12	1.07	3.06	0.45	2.73	0.55	1.59	0.252	1.63
WMB5	WMB5	WMB	51.62	16.64	8.6	0.154	5.48	9.97	2.82	1.66	0.572	0.23	99.54	41		317	100	23	20	100	70	16	1.5	9	30	897	15.5	48	1.3				< 1		0.4	542	13	26.8	3.47	14.8	3.45	1.15	3.1	0.48	2.75	0.54	1.5	0.226	1.51
WMB23	WMB23	WMB	61.12	17.48	6.41	0.063	2.72	1.68	1.55	2.73	0.828	0.16	99.06	21		193	130	10	30	20	120	22	1.6	< 5	65	198	25	139	8.8				2		2.5	940	26.6	54.6	6.38	25.2	5.31	1.13	4.49	0.73	4.53	0.9	2.63	0.394	2.62
WMB2	WMB2	WMB	53.73	17.33	7.43	0.131	4.7	8.91	2.08	2.13	0.528	0.24	99.59	29		261	50	21	< 20	110	60	16	1.3	6	33	696	17.6	51	1.5				< 1		0.8	452	15.9	31.4	3.85	16.1	3.41	1.11	3.04	0.46	2.83	0.56	1.65	0.24	1.64
[truncated: 20 more columns]

[truncated: 2 more sheets: Zircon analyses, Combined data]
